# Supplementary material for: Cenomanian to Coniacian Water-mass Evolution in the Cretaceous Western Interior Seaway of North America and Equatorial Atlantic
Source: Copernicus journal article supplement (doi:10.5194/cp-2016-111), 2016-11-25
Supplement: Supplementary file 1 [file cp-2016-111-supplement.zip]

Archive with 2 entries (2 files):
- Eldrett et al. Supplemental Information -discussion paper.pdf
- Supplementary Datafile.xlsx
