# Supplementary material for: Cenomanian to Coniacian Water-mass Evolution in the Cretaceous Western Interior Seaway of North America and Equatorial Atlantic
Source: Copernicus journal article supplement (doi:10.5194/cp-2016-111), 2016-11-25
Supplement: Supplementary file 1 [file cp-2016-111-supplement.zip › Supplementary Datafile.xlsx]

## Sheet: Isotopes
IONA				INNES				Well X				Portland				Site 1260				Site 1261
Age (Ma)	Depth (m)	δ13C organic (‰ PDB)		Age (Ma)	Depth (m)	δ13C organic (‰ PDB)		Age (Ma)	Depth (m)	δ13C organic (‰ PDB)		Age (Ma)	Depth (m)	δ13C organic (‰ PDB)		Age (Ma)	Depth (m.c.d)	δ13C organic (‰ PDB)		Age (Ma)	Depth (m.c.d)	δ13C organic (‰ PDB)
89.3524	3.62	-26.15		89.8663	12.24	-25.59		93.9801	1620.24	-24.8		90.6316	71.35	-25.87		80.7348	417.455	-27.15		91.4163	602.17	-27.53
89.3766	4.77	-26.24		89.9095	13.58	-25.69		94.0179	1620.62	-24.52		90.644	71.82	-26.33		81.0967	417.655	-27.55		91.4941	603.15	-27.75
89.4029	5.85	-24.49		89.9874	17.45	-26.14		94.03	1620.74	-24.22		90.6583	72.36	-26		81.6396	417.955	-27.45		91.5592	603.97	-27.51
89.4234	6.69	-26.09		90.0508	18.5	-25.81		94.0481	1620.93	-24.07		90.671	72.84	-25.46		82.0015	418.155	-27.82		91.5989	604.47	-27.19
89.4535	7.91	-26.71		90.17	22.5	-25.37		94.0678	1621.12	-24		90.6844	73.35	-26.68		82.3634	418.355	-26.9		91.6767	605.45	-26.91
89.475	8.78	-25.41		90.3309	24.24	-25.99		94.0995	1621.44	-23.99		90.6971	73.83	-25.39		83.3586	418.905	-27.44		91.7164	605.95	-27.25
89.5068	10.1	-25.78		90.434	25.35	-25.98		94.1388	1621.84	-23.7		90.7106	74.34	-26.48		83.811	419.155	-27.92		91.7299	606.12	-26.22
89.5237	10.79	-25.9		90.4925	25.98	-26.25		94.1479	1621.93	-23.74		90.7372	75.35	-26.19		84.1729	419.355	-27.66		91.7617	606.52	-24.54
89.5539	12.03	-25.49		90.5622	26.73	-26.72		94.1827	1622.28	-23.45		90.7504	75.85	-26.59		84.4443	419.505	-27.69		91.7815	606.77	-26.64
89.5732	12.84	-25.01		90.7462	28.71	-26.5		94.2023	1622.48	-23.3		90.7642	76.37	-26.14		84.8967	419.755	-27.69		91.8014	607.02	-26.89
89.6045	14.15	-26.32		90.7877	29.38	-26.87		94.2357	1622.89	-23.42		90.776	76.82	-26.36		85.8738	420.295	-27.61		91.8212	607.27	-26.86
89.6181	14.69	-26.64		90.8369	30.22	-27.14		94.2554	1623.35	-23.4		90.803	77.84	-25.98		86.2357	420.495	-27.51		91.8411	607.52
89.6467	15.84	-25.98		90.9213	31.52	-26.83		94.256	1623.36	-23.42		90.8175	78.39	-26.05		86.5976	420.695	-27.96		91.8609		-26.65
89.6593	16.38	-26.31		90.9823	32.15	-26.85		94.2642	1623.55	-23.37		90.8299	78.86	-26.48		87.1405	420.995	-27.84		91.8808	608.02	-24.12
89.6942	17.78	-25.89		91.0938	33.3	-27.12		94.2961	1624.26	-23.42						87.5928	421.245	-28.11		91.885	608.62	-26.92
89.7155	18.67	-26.39		91.2197	34.6	-26.73		94.3021	1624.37	-23.49		91.6369	79.58	-29.25		88.0271	421.485	-27.56		91.9	609.06	-27.62
89.7495	20.05	-26.13		91.2924	35.35	-27.14		94.3216	1624.72	-23.34		91.6636	80.59	-29.04		88.389	421.685	-27.42		91.91	610	-24.46
89.7645	20.65	-26.55		91.367	36.12	-26.71		94.3378	1625.01	-23.23		91.6868	81.47	-28		88.7509	421.885	-27.79		91.915	610.6	-26.21
89.7968	21.93	-25.89		91.4668	37.15	-27.76		94.3469	1625.29	-23.65		91.7151	82.54	-29.72		88.959	422	-27.6		92.1261	611.11	-26.77
89.8253	23.12	-25.85		91.5104	37.6	-26.4		94.36	1625.68	-23.97		91.7399	83.48	-26.42		89.1128	422.085	-27.57		92.2055	612.11	-26.71
89.8366	23.57	-26.22		91.5792	38.31	-26.59		94.3667	1625.93	-23.66		91.7681	84.55	-30.32		89.3933	422.24	-27.51		92.2421	612.57	-26.63
89.8688	24.87	-26.24		91.6742	39.29	-26.04		94.3775	1626.32	-23.62		91.7964	85.62	-26.54		89.4747	422.285	-27.83		92.2818	613.07	-26.81
89.8956	25.93	-25.38		91.7285	39.85	-26.19		94.3858	1626.63	-23.15		91.8228	86.62	-27.12		89.8366	422.485	-27.6		92.3215	613.57	-27.27
89.909	26.47	-26.38		91.774	40.32	-26.57		94.3937	1626.92	-23.49		91.8478	87.57	-30.82		89.8818	422.51	-27.2		92.3612	614.07
89.9364	27.6	-25.95		91.7963	40.55	-26.57		94.4	1627.14	-23.66		91.8719	88.48	-26.78		89.9361	422.54	-27.46		92.4009	614.57	-27
89.9575	28.44	-26.31		91.8438	41.04	-26.69		94.4143	1627.63	-23.41		91.9001	89.55	-28.98		90.3523	422.77	-27.73		92.4644	615.37
89.989	29.73	-25.53		91.8593	41.2	-26.24		94.4242	1627.97	-22.26		91.926	90.53	-28		90.4609	422.83	-27.7		92.5017	615.84	-27.11
90.0089	30.59	-26.66		91.9155	41.78	-27.16		94.4271	1628.07	-23.38		91.9524	91.53	-26.96		90.479	422.84	-27.3		92.5414	616.34	-27.06
90.0295	31.42	-26.43		91.9416	42.05	-27.1		94.43	1628.17	-22.55		91.9767	92.45	-26.19		90.6599	422.94	-27.65		92.56	616.84	-24.22
90.0523	32.34	-26.67		91.9542	42.18	-25.84		94.4414	1628.42	-22.65		92.0055	93.54	-26.09		90.8409	423.04	-27.49		93.21	619.4	-27.19
90.0549	33.09	-26.33						94.4582	1628.81	-22.93		92.0313	94.52	-26.25		90.8499	423.045	-27.4		93.2375	619.9	-27.25
90.0764	33.96	-26.1		94.125	42.51	-24.47		94.4709	1629.1	-23.29		92.0577	95.52	-28.09		90.9314	423.09	-27.3		93.283	620.6	-26.78
90.1027	35.03	-25.69		94.1312	42.63	-24.34		94.4816	1629.34	-22.9		92.0836	96.5	-29.09		91.0218	423.14	-27.19		93.3149	621.09	-27.3
90.1282	36.08	-25.92		94.1421	42.84	-24.45		94.4991	1629.74	-23.7		92.1103	97.51	-29.31		91.2028	423.24	-27.22		93.3474	621.59	-26.95
90.1471	36.85	-26.31		94.1478	42.95	-23.87		94.5098	1629.98	-23.59		92.139	98.6	-26.93		91.2118	423.245	-27.7		93.3799	622.09	-27.21
90.1727	37.89	-26.39		94.1722	43.42	-23.84		94.5286	1630.41	-23.45		92.1633	99.52	-27.72		91.2933	423.29	-26.9		93.4078	622.52	-27.12
90.1933	38.74	-26.17		94.1773	43.52	-23.71		94.54	1630.66	-23.68		92.1897	100.52	-26.73		91.3837	423.34	-27.28		93.4111	622.57
90.2164	39.67	-25.98		94.1908	43.78	-23.83		94.5514	1630.92	-23.43		92.1913	100.58	-26.19		91.5647	423.44	-27.49		93.4403	623.02	-26.78
90.2335	40.35	-26.2		94.197	43.9	-23.66		94.5608	1631.14	-23.33		92.2061	101.14	-27.24		91.5737	423.445	-27.47		93.4728	623.52	-26.37
90.2517	41.08			94.2115	44.18	-23.05		94.5662	1631.26	-23.36		92.2156	101.5	-26.29		91.76	423.54	-27.52		93.5053	624.02	-26.95
90.2606	41.44	-26.6		94.2203	44.35	-23.59		94.5829	1631.64	-24.38		92.2341	102.2	-27.28		91.8361	423.59	-26		93.5378	624.52	-26.94
90.2668	41.69	-26.16		94.2343	44.62	-23.29		94.5876	1631.75	-24.06		92.2412	102.47	-26.41		91.9266	423.64	-26.47		93.5703	625.02	-27.12
90.272	41.89	-26.75		94.2436	44.8	-23.44		94.5916	1631.84	-24.78		92.245	102.74	-27.21		91.95	423.645	-27.13		93.5996	625.47	-26.9
90.2753	42.05	-26.07		94.2478	44.88	-23.26		94.6071	1632.19	-23.93		92.2676	103.47	-27.27		92.0473	423.68	-27.1		93.6321	625.97	-27.03
90.3185	42.53	-26.86		94.253	44.98	-23.04		94.6151	1632.37	-23.47		92.2679	103.48	-26.35		92.1908	423.74	-27.45		93.6646	626.47	-27.14
90.3247	42.63			94.2711	45.33	-23.6		94.6319	1632.75	-23.49		92.2834	104.07	-27.32		92.2865	423.78	-27.5		93.7068	627.12
90.3296	42.77	-26.04		94.3017	45.92	-23.56		94.65	1632.97	-23.15		92.2969	104.58	-27.29		92.43	423.84	-27.58		93.7231	627.37	-26.59
90.3717	43.23	-26.19		94.351	46.44	-23.61		94.665	1633.24	-23.71		92.3077	104.99	-27.26		92.56	423.9	-24.6		93.7338	627.535
90.4185	43.78	-27.17		94.3535	46.92	-23.49		94.69	1633.7	-23.87		92.3336	105.97	-27.2		92.6249	423.94	-24.73		93.7555	627.87	-26.87
90.4516	44.18	-27.15		94.3628	47.1	-23.35		94.705	1633.97	-23.66		92.3463	106.45	-27.19		92.7442	424.03	-24.2		93.7809	628.26	-26.34
90.4855	44.6	-26.51		94.3706	47.25	-23.36		94.7083	1634.03	-23.63		92.359	106.93	-27.44		92.9165	424.16	-24.6		93.8134	628.76	-25.95
90.5718	45.66	-25.71		94.3762	47.36	-23.34		94.7217	1634.28	-24.55		92.3714	107.4	-27.08		93.0756	424.28	-24.7		93.8459	629.26	-25.42
90.5758	45.72	-24.66		94.3835	47.5	-23.17		94.74	1634.61	-24.47		92.3854	107.93	-27.15		93.1153	424.31	-25.38		93.8784	629.76	-24.66
90.667	46.28	-26.84		94.4146	48.1	-23.11		94.7458	1634.76	-24.61		92.397	108.37	-26.84		93.126	424.325	-25.44		93.9047	630.165
90.6964	46.65	-27.1		94.4265	48.33	-22.87		94.7643	1635.25	-24.83		92.4096	108.85	-27.21		93.13	424.33	-25.2		93.9096	630.24	-22.97
90.6839	47.09	-27		94.43	48.43	-22.47		94.7759	1635.56	-25.57		92.4234	109.37	-27.31		93.214	424.395	-26.94		94.02	630.96	-21.36
90.7276	47.59	-26.58		94.4668	48.75	-22.52		94.7822	1635.72	-25.53		92.4368	109.88	-26.95		93.2297	424.41	-27.25		93.9922	631.46	-21.67
90.7276	48.06	-25.75		94.4872	49.27	-22.82		94.795	1636.06	-25.36		92.45	110.38	-27		93.2507	424.43	-26.8		94.048	631.86	-21.25
90.7276	48.35			94.5085	49.81	-23.82		94.81	1636.46	-25.36		92.4627	110.86	-27.21		93.3187	424.495	-27.41		94.1317	632.46	-21.78
90.7523	48.45			94.5247	50.22	-22.88		94.8161	1636.59	-25.77		92.4754	111.34	-26.66		93.3344	424.51	-27.17		94.221	633.1	-22.51
90.7682	48.7	-26.05		94.5357	50.5	-23.79		94.8242	1636.78	-25.86		92.4841	111.67	-26.92		93.3658	424.54	-27.2		94.2991	633.66
90.8303	49.44	-26.42		94.5463	50.77	-24.77		94.8458	1637.26	-25.98		92.5018	112.34	-26.77		93.4234	424.595	-26.1		94.3451	633.99	-22.21
90.87	49.88	-27.64		94.56	51.08	-27.23		94.8728	1637.89	-26.32		92.515	112.84	-26.86		93.4391	424.61	-27.5		94.4037	634.41	-23.18
90.9029	50.4			94.5674	51.25	-24.76		94.889	1638.24	-26.37		92.5279	113.33	-26.77		93.4601	424.63	-27.3		94.43	634.8	-22.49
90.9198	50.63	-27.27		94.5902	51.65	-24.02		94.9038	1638.57	-26.38		92.5414	113.84	-26.54		93.5281	424.695	-27.05		94.5553	635.55	-23.46
90.9349	50.81	-28.26		94.6045	51.9	-24.48		94.9187	1638.91	-26.66		92.5546	114.34	-26.48		93.5438	424.71	-27.26		94.5926	635.84	-26.44
90.9875	51.44	-27.29		94.62	52.13	-23.78		94.9443	1639.49	-26.39		92.5675	114.83	-26.95		93.5438	424.71	-27.2		94.6081	635.96	-24.34
90.9966	51.54	-27.19		94.6286	52.43	-23.24		94.9639	1639.93	-26.86		92.5802	115.31	-26.49		93.6328	424.795	-26.7		94.6698	636.44
91.0875	52.57	-27.38		94.6338	52.6	-23.7		94.9794	1640.28	-26.62		92.5934	115.81	-26.78		93.6486	424.81	-27.18		94.65	636.51	-23.71
91.1546	53.27	-27.16		94.6368	52.7	-23.99		95.0037	1640.83	-26.36		92.6066	116.31	-26.96		93.6486	424.81	-27.2		94.7932	636.8	-24.56
91.2026	53.75	-27.01		94.6383	52.75	-24.3		95.0266	1641.35	-26.71		92.619	116.78	-26.49		93.7376	424.895	-26.68		94.87	637	-27.69
91.2763	54.5	-26.94		94.6444	52.95	-23.63		95.0442	1641.74	-26.8		92.6311	117.24	-26.5		93.7533	424.91	-26.52		94.9059	637.29	-27.6
91.3	54.76	-27.21		94.65	53.12	-24.41		95.0901	1642.78	-26.6		92.6446	117.75	-26.78		93.7533	424.91	-26.6		94.913	637.57
91.3417	55.16	-27.64		94.6576	53.33	-24.59		95.113	1643.3	-26.89		92.6573	118.23	-26.48		93.8423	424.995	-23.83		94.9134	637.585
91.409	55.82	-27.64		94.665	53.65	-25.58		95.1252	1643.57	-26.77		92.6705	118.73	-26.08		93.858	425.01	-23.93		94.9143	637.62	-27.38
91.4713	56.43	-27.16						95.1319	1643.73	-26.96		92.6837	119.23	-26.39		93.858	425.01	-23.8		94.922	637.92	-28.08
91.4903	56.61	-27.49		94.89	53.98	-26.46		95.1461	1644.05	-26.88		92.6974	119.75	-26.34		93.9522	425.1	-26.1		94.9309	638.27	-27.85
91.539	57.09	-27.04		94.9203	54.3	-26.35		95.1718	1644.62	-26.67		92.709	120.19	-26.34		93.9627	425.11	-25.51		94.9373	638.52	-28.2
91.5614	57.3	-26.64		94.9446	54.55	-26.7		95.1927	1645.1	-26.84		92.7241	120.76	-26.49		94.02	425.18	-21.7		94.9584	639.35	-27.32
91.6828	58.44	-27.47		95.0226	55.35	-26.82		95.244	1646.26	-26.68		92.7365	121.23	-26.36		94.0619	425.21	-23.67		94.9635	639.55	-26.22
91.7152	58.74	-26.9		95.0607	55.74	-26.74		95.2892	1647.28	-26.92		92.7505	121.76	-26.49		94.1114	425.245	-22.33		94.9686	639.75	-27.4
91.7597	59.17	-26.57		95.0938	56.08	-27.03		95.3135	1647.83	-26.85		92.76	122.27	-25.43		94.1467	425.27	-22.2		94.9773	640.09	-27.95
91.8331	59.88	-26.58		95.1172	56.32	-27.13		95.3709	1649.12	-26.89		92.782	122.75	-25.55		94.2033	425.31	-22.37		94.9872	640.48	-27.77
91.8806	60.35	-26.62		95.1445	56.6	-26.84		95.4107	1650.02	-26.97		92.8114	123.24	-25.54		94.2528	425.345	-22.24		94.993	640.705	-27.87
91.9352	60.93	-26.07		95.2011	57.18	-26.69		95.4593	1651.12	-26.86		92.8414	123.74	-25.92		94.274	425.36	-22.3		95.0031	641.1	-27.86
91.9541	61.14	-26.22		95.2371	57.55	-26.7		95.5187	1652.46	-27.15		92.8702	124.22	-26.45		94.3447	425.41	-22.13		95.0082	641.3	-28.12
91.9985	61.63	-27.47		95.279	57.98	-26.65		95.6287	1654.94	-26.88		92.8996	124.71	-26.38		94.3941	425.445	-22.08		95.0166	641.63	-27.79
92.0528	62.23	-26.83		95.2976	58.17	-26.82		95.7124	1656.83	-26.66		92.9278	125.18	-25.95		94.43	425.47	-22		95.0201	641.77	-27.36
92.0756	62.49	-27.12		95.32	58.4	-27.04		95.7677	1658.08	-26.84		92.956	125.65	-26.08		94.4228	425.51	-22.35		95.0252	641.97	-27.44
92.1443	63.27	-27.14		95.3268	58.47	-27.23		95.8595	1660.15	-27.03		92.9854	126.14	-26.1		94.4348	425.545	-22.55		95.031	642.195	-27.87
92.1989	63.9	-27		95.36	58.8	-27.26		95.9418	1662.01	-27.26		93.0124	126.59	-25.88		94.4434	425.57	-22.9		95.0426	642.65	-27.33
92.2446	64.5	-27.06		95.3687	59.1	-27.1		95.9621	1662.47	-27.27		93.0424	127.09	-26.32		94.4572	425.61	-24.45		95.0474	642.84	-27.26
92.2705	64.9	-26.96		95.41	60.58	-27.1		95.9661	1662.56	-27.47		93.0712	127.57	-26.49		94.4743	425.66	-22.8		95.0553	643.15	-27.47
92.2836	65.12	-27.45		95.4361	60.85	-27.31		95.9938	1663.19	-27.41		93.1006	128.06	-26.29		94.5121	425.77	-24.3		95.0655	643.55
92.3237	65.8	-27.25		95.4724	61.2	-27.12		96.012	1663.6	-27.62		93.1288	128.53	-26.07		94.5396	425.85	-23.7		95.0722	643.81	-27.86
92.3532	66.3	-27.1		95.4921	61.39	-27.1		96.0842	1665.23	-27.65		93.1564	128.99	-26.3		94.5603	425.91	-23.9		95.0852	644.32	-27.91
92.3641	66.49	-26.26		95.5378	61.83	-26.94		96.197	1667.77	-27.31		93.1858	129.48	-26.45		94.5723	425.945	-25.34		95.0928	644.62	-28.04
92.4039	67.2	-26.61		95.5958	62.39	-27.24		96.2597	1669.19	-27.2		93.2152	129.97	-26.75		94.5775	425.96	-24.9		95.0974	644.8	-27.7
92.4217	67.53	-26.58		95.6467	62.88	-26.88		96.3394	1670.99	-27.26		93.2452	130.47	-26.51		94.5946	426.01	-23.58		95.1038	645.05	-27.43
92.4519	68.09	-26.74		95.7068	63.46	-26.61		96.3967	1672.29	-27.14		93.2734	130.94	-26.62		94.5946	426.01	-23.5		95.1089	645.25	-27.65
92.4924	68.87	-26.07		95.7431	63.81	-26.87		96.4379	1673.21	-27.13		93.3016	131.41	-26.43		94.6067	426.045	-25.31		95.1165	645.55	-27.9
92.5001	69.03	-26.02		95.7867	64.23	-26.83						93.3316	131.91	-27.08		94.6118	426.06	-25.2		95.1201	645.69	-27.19
				95.8852	65.49	-27.43						93.3592	132.37	-26.84		94.65	426.11	-22.7		95.1249	645.88	-27.51
92.7284	69.86	-25.76		95.9122	65.85	-27.09						93.3862	132.82	-26.77		94.649	426.11	-22.4		95.1316	646.14	-27.68
92.7571	70.45	-23.82		95.9871	66.85	-27						93.418	133.35	-27.28		94.6805	426.145	-27.09		95.1433	646.6	-27.76
92.7672	70.66	-25.96		96.0844	68.15	-27.01						93.445	133.8	-27.01		94.703	426.17	-27.3		95.1563	647.11	-27.9
92.7923	71.15	-25.39		96.1556	69.1	-27.11						93.4744	134.29	-27.05		94.721	426.19	-26.3		95.1645	647.43	-27.51
92.8254	71.83	-25.57		96.1683	69.27	-27.34						93.502	134.75	-27.53		94.74	426.21	-24.06		95.1714	647.7	-28.86
92.8548	72.51	-25.03		96.23	70.08	-26.98						93.5314	135.24	-27.01		94.737	426.21	-23.9		95.178	647.96	-27.94
92.8685	72.77	-25.27		96.2701	70.85	-27.22						93.5614	135.74	-27.42		94.765	426.25	-23.8		95.1789	647.995
92.892	73.23	-25.22		96.2895	71.25	-27.27						93.5896	136.21	-27.34		94.793	426.29	-26.9		95.192	648.51	-28.24
92.9095	73.6	-25.36		96.3074	71.62	-27.1						93.6178	136.68	-27.07		94.81	426.31	-24.75		95.1984	648.76	-28.12
92.94	74.25	-25.1		96.3273	72.03	-27.02						93.6388	137.03	-27.7		94.8432	426.31	-24.7		95.2032	648.95	-27.93
92.9532	74.5	-25.56		96.3766	73.05	-27.02						93.6436	137.11	-27.26		94.9547	426.34	-27.2		95.2096	649.2	-27.21
92.9831	75.06	-24.98		96.395	73.43	-27.56						93.6466	137.16	-25.75		94.94	426.345	-25.11		95.2185	649.55	-28.25
93.0252	75.88	-25.49		96.4531	74.63	-27.4						93.6472	137.17	-27.05		94.9294	426.38	-28.2
93.0519	76.41	-24.79		96.4904	75.4	-26.59						93.6496	137.21	-26.57		94.9314	426.41	-28.38
93.0613	76.59	-24.79		96.5252	76.12	-26.15						93.6526	137.26	-25.23		94.9314	426.41	-28.3
93.1032	77.42	-25.3		96.562	76.88	-27.21						93.6556	137.31	-25.48		94.9334	426.44	-28.4
93.1107	77.6	-25.91		96.6	77.73	-27.24						93.6586	137.36	-25.44		94.9381	426.51	-27.98
93.1334	78.05	-25.28										93.6616	137.41	-27.7		94.9381	426.51	-28.3
93.1449	78.28	-25.89		96.827	79.65	-27.33						93.6646	137.46	-28.18		94.9405	426.545	-28.33
93.2072	79.51	-25.91		96.8611	79.95	-26.14						93.6706	137.56	-28.05		94.9435	426.59	-28.3
93.2151	79.65	-26.25										93.6778	137.68	-27.28		94.9449	426.61	-28.22
93.2493	80.25	-25.65		97.0116	80.4	-27.48						93.7084	138.19	-27.23		94.9496	426.68	-28.1
93.2638	80.48	-26.28		97.0286	80.51	-27.16						93.7102	138.22	-27.54		94.9516	426.71	-28.36
93.3154	81.25	-25.9		97.0425	80.6	-26.66						93.7132	138.27	-26.76		94.957	426.79	-28.8
93.3254	81.4	-26.49		97.0484	80.64	-26.79						93.7318	138.58	-27.51		94.9583	426.81	-28.26
93.3254	81.45											93.7348	138.63	-26.84		94.963	426.88	-28.1
93.3254	81.6			97.4606	80.73	-26.4						93.739	138.7	-26.75		94.965	426.91	-28.26
93.3265	81.65			97.478	81.2	-26.16						93.7438	138.78	-27.47		94.9691	426.97	-28.5
93.3835	82.46	-25.17		97.4987	81.78	-26.57						93.7468	138.83	-25.79		94.9718	427.01	-28.67
93.3988	82.67	-26.11										93.766	139.15	-27		94.9765	427.08	-28.6
93.4298	83.11	-25.53										93.7678	139.18	-27.38		94.9785	427.11	-28.79
93.445	83.32	-26.03										93.781	139.4	-25.74		94.9846	427.2	-28.58
93.5006	84.1	-25.03										93.7972	139.67	-26.82		94.9913	427.3	-27.84
93.5149	84.3	-26.12										93.799	139.7	-25.92		94.992	427.31	-27.95
93.5665	85.02	-25.55										93.802	139.75	-26.89		94.9943	427.345	-25.06
93.5866	85.31	-26.14										93.805	139.8	-26.11		94.9987	427.41	-28.58
93.6641	86.46											93.808	139.85	-26.93		95.001	427.445	-28.92
93.6772	86.65	-25.86										93.811	139.9	-27.39		95.0027	427.47	-28.6
93.6901	86.84	-26.06										93.817	140	-26.64		95.0054	427.51	-28.73
93.7484	87.74	-25.09										93.82	140.05	-27.68		95.0078	427.545	-28.46
93.7575	87.88	-25.73										93.823	140.1	-25.99		95.0122	427.61	-28.68
93.8084	88.77	-25.55										93.826	140.15	-25.96		95.0175	427.69	-28.19
93.8163	88.915	-26.39										93.8416	140.41	-26.09		95.0189	427.71	-28.16
93.8373	89.32	-25.72										93.8446	140.46	-26.71		95.0256	427.81	-28.06
93.852	89.6	-26.21										93.8506	140.56	-26.14		95.029	427.86	-28
93.9037	90.57	-25.7										93.853	140.6	-27.14		95.0313	427.895	-28.79
93.9179	90.83	-25.95										93.856	140.65	-25.98		95.0323	427.91	-28.51
93.9554	91.56	-25.41										93.8812	141.07	-26.1		95.0367	427.975	-28.54
93.9656	91.74	-25.79										93.8842	141.12	-24.29		95.0377	427.99	-28.61
93.9692	91.8											93.8932	141.27	-25.8		95.0381	427.995	-28.4
94.016	92.73	-24.48										93.8992	141.37	-25.68		95.0391	428.01	-28.78
94.0207	92.815	-24.86										93.9166	141.66	-25.75		95.0431	428.07	-28.6
94.0259	92.94	-25.36										93.919	141.7	-25.78		95.0451	428.1	-28.66
94.0491	93.44											93.9256	141.81	-25.82		95.0502	428.175	-28.89
94.0659	93.76	-25.16										93.9346	141.96	-25.64		95.0505	428.18	-28.78
94.0894	94.22	-25.22										93.952	142.25	-25.86		95.0532	428.22	-28.71
94.096	94.34											93.9568	142.33	-24.27		95.0579	428.29	-28.47
94.104	94.5											93.9628	142.43	-26.32		95.07	428.47	-28.2
94.1159	94.73	-24.97										93.982	142.75	-26.31		95.0848	428.69	-28.65
94.1365	95.15	-24.68										93.985	142.8	-25.45		95.0906	428.775	-28.63
94.1444	95.31	-24.41										93.988	142.85	-25.49		95.104	428.975	-28.03
94.1828	96.1	-23.91										93.991	142.9	-25.68		95.105	428.99	-28.24
94.2147	96.75	-23.07										94.02	143.31	-23.97		95.1104	429.07	-27.5
94.2264	96.98	-23.39										94.0377	143.41	-24.7		95.1175	429.175	-28.08
94.2487	97.41	-23.3										94.0455	143.46	-24.61		95.1252	429.29	-28.07
94.2696	97.82	-23.33										94.0533	143.51	-23.99		95.1309	429.375	-27.59
94.2847	98.08	-23.34										94.0611	143.56	-26.04		95.1407	429.52	-27.9
94.3114	98.56	-23.44										94.1081	143.86	-25.01		95.1444	429.575	-28.16
94.3401	99.1											94.1159	143.91	-24.16		95.1454	429.59	-28.8
94.3499	99.3	-23.38										94.1237	143.96	-24.77		95.1579	429.775	-28.53
94.3748	99.82	-23.36										94.1316	144.01	-23.96		95.1743	430.02	-28.1
94.4017	100.3	-23.2										94.1394	144.06	-23.98		95.178	430.075	-28.59
94.42	100.66											94.1472	144.11	-24.22		95.206	430.49	-28
94.42	100.72											94.1535	144.15	-24.67		95.2083	430.525	-28.42
94.4297	100.9	-22.26										94.1597	144.19	-24.31		95.2218	430.725	-28.43
94.4544	101.35	-22.61										94.1848	144.35	-22.93		95.2453	431.075	-28.45
94.4792	101.83	-22.61										94.1926	144.4	-23.73		95.2464	431.09	-28.3
94.4928	102.21	-23.61										94.2004	144.45	-24.58		95.2588	431.275	-28.69
94.5322	102.95	-22.82										94.2051	144.48	-23.28		95.2655	431.375	-28.35
94.537	103.06	-23										94.2129	144.53	-24.21		95.2723	431.475	-28.58
94.5464	103.22	-23.26										94.2521	144.78	-24		95.2733	431.49	-28.4
94.5511	103.33	-23.83										94.2583	144.82	-23.41		95.279	431.575	-28.48
94.5571	103.44	-23.03										94.2662	144.87	-23.63		95.2857	431.675	-28.13
94.5632	103.56	-22.42										94.274	144.92	-23.02		95.2925	431.775	-28.09
94.5713	103.75	-23.23										94.2818	144.97	-22.65		95.2941	431.8	-28.1
94.574	103.82	-22.96										94.2881	145.01	-23.2		95.2992	431.875	-28.37
94.5819	104	-23.5										94.2975	145.07	-23.03		95.3059	431.975	-27.95
94.5914	104.18	-24.74										94.3115	145.16	-24.64		95.3126	432.075	-27.25
94.6043	104.44	-23.12										94.3272	145.26	-23.39		95.3194	432.175	-27.07
94.6123	104.6	-22.87										94.335	145.31	-23.44		95.3261	432.275	-27.37
94.6238	104.83	-23.02										94.3444	145.37	-23.21		95.3328	432.375	-28.34
94.6517	105.4	-22.61										94.3585	145.46	-24.29		95.353	432.675	-27.29
94.6663	105.69	-24.44										94.4164	145.83	-24.12		95.3598	432.775	-28.11
94.6797	105.96	-24.01										94.4242	145.88	-22.83		95.3665	432.875	-25
94.6944	106.27											94.43	145.93	-22.14		95.3732	432.975	-28.34
94.7032	106.45	-25.84										94.4493	146.04	-23.28		95.3799	433.075	-27.42
94.7266	106.94	-25.56														95.3867	433.175	-27.68
94.7377	107.17	-24.47										94.4663	146.39	-24.43		95.3934	433.275	-27.64
94.7462	107.339											94.4805	146.49	-25.32		95.4001	433.375	-27.67
94.7476	107.35	-25.4										94.507	146.799	-25.02		95.4089	433.505	-26.48
94.7696	107.82	-26.32										94.5071	146.8	-25.38		95.4156	433.605	-27.85
94.7872	108.2	-25.62										94.5113	146.849	-24.43		95.4223	433.705	-27.92
94.8106	108.77	-24.78										94.5114	146.85	-24.24		95.4291	433.805	-27.89
94.831	109.22	-25.9										94.5174	146.92	-23.44		95.4661	434.355	-27.16
94.8585	109.8	-26.58										94.5178	146.924	-23.51		95.4728	434.455	-28.37
94.8701	110.01	-26.79										94.5389	147.17	-25.4		95.5098	435.005	-26.62
94.8956	110.49	-26.44										94.543	147.218	-23.19		95.5166	435.105	-28.71
94.9443	111.36	-26.43										94.5432	147.22	-23.39		95.53	435.305	-28.28
94.9748	111.88	-26.73										94.5473	147.268	-25.85		95.5368	435.405	-25.95
95.0084	112.45	-27.19										94.5475	147.27	-23.76		95.5435	435.505	-28.43
95.0226	112.77	-26.79										94.6075	147.968	-25.25		95.5502	435.605	-27.85
95.0374	113.07	-27.11										94.6076	147.97	-25.13		95.5569	435.705	-28.43
95.0592	113.42	-27										94.6119	148.02	-22.97		95.567	435.855	-28.1
95.0951	114.04	-26.94										94.6154	148.06	-23.25		95.5738	435.955	-28.09
95.1016	114.22											94.616	148.068	-25.19		95.5906	436.205	-28.15
95.115	114.45	-26.91										94.6162	148.07	-25.41		95.594	436.255	-28.75
95.1716	115.45	-26.95										94.6196	148.11	-25.95		95.6007	436.355	-27.36
95.1883	115.79	-27.08										94.6199	148.113	-25.96		95.6559	437.175	-27.76
95.2072	116.15	-26.98										94.65	148.53	-23.87		95.6592	437.225	-28.7
95.2337	116.76	-26.64										94.7155	148.53			95.6626	437.275	-28.54
95.2554	117.21	-27.14										94.7209	148.698	-24.72		95.666	437.325	-27.81
95.2694	117.51	-26.78										94.721	148.7	-24.66		95.6693	437.375	-28.28
95.2978	118.16	-26.92										94.7226	148.75	-24.49		95.6727	437.425	-28.41
95.3201	118.61	-26.8										94.7227	148.752	-24.53		95.6794	437.525	-28.15
95.3241	118.75											94.7242	148.8	-25.03		95.6828	437.575	-28.22
95.3597	119.49	-26.89										94.7259	148.85	-26.39		95.6862	437.625	-28.14
95.3739	119.77	-27.32										94.7291	148.95	-26.34		95.6895	437.675	-28.43
95.4054	120.4	-26.58										94.7307	149	-27.31		95.6929	437.725	-28.33
95.4194	120.67	-27.35										94.7308	149.002	-25.86		95.6963	437.775	-29.31
95.426	120.79	-27.31										94.7325	149.057	-27.31		95.6996	437.825	-28.5
95.4406	121.09	-27.03										94.7326	149.06	-26.93		95.703	437.875	-28.43
95.4632	121.51	-26.85										94.7388	149.25	-27.39		95.7164	438.075	-28.33
95.4965	122.18	-27.19										94.7452	149.45	-26.48		95.7198	438.125	-28.33
95.5329	122.91	-27.37										94.7549	149.75	-27.62		95.7501	438.575	-28.5
95.5442	123.14	-27.1										94.7711	150.25	-27.56		95.7703	438.875	-27.87
95.5716	123.68	-26.82										94.7872	150.75	-27.47		95.7737	438.925	-28.19
95.5888	124.03	-27.04										94.7898	150.83	-26.78		95.777	438.975	-28.43
95.617	124.55	-27.23										94.7948	150.986	-26.49		95.7804	439.025	-28.05
95.6265	124.85											94.8018	151.201	-26.25		95.7837	439.075	-27.91
95.6318	125											94.81	151.221	-26.52		95.7871	439.125	-28.12
95.6377	125.13	-27.25										94.8059	151.25	-27.63		95.7905	439.175	-28.07
95.6562	125.5	-27.49										94.8094	151.281	-26.5		95.7938	439.225	-28.29
95.6882	126.1	-27.36										94.8634	151.75	-27.38		95.8039	439.375	-28.93
95.7002	126.33	-27.39										94.868	151.79	-26.8		95.8073	439.425	-28.71
95.7394	127.2											94.9135	152.185	-26.34		95.8107	439.475	-28.74
95.7456	127.31	-26.64										94.94	152.35	-27.25		95.814	439.525	-28.7
95.7703	127.77	-26.98										94.9376	152.41	-27.07		95.8174	439.575	-28.17
95.7991	128.36	-27.53										94.9515	152.75	-27.61		95.8208	439.625	-28.42
95.827	128.87	-27.45										94.9719	153.25	-27.42		95.8241	439.675	-28.69
95.8409	129.11	-27.39										94.9924	153.75	-27.76		95.8275	439.725	-28.84
95.8493	129.27	-27.46										95.0128	154.25	-27.37		95.8309	439.775	-28.36
95.8953	130.17	-27.54										95.0333	154.75	-27.4		95.8342	439.825	-28.38
95.9215	130.74	-27.44										95.0578	155.35	-27.45		95.8376	439.875	-28.72
95.9557	131.52	-27.02										95.0599	155.4	-26.99		95.841	439.925	-28.85
95.9672	131.74	-27.4										95.0619	155.45	-27.06		95.8443	439.975	-28.81
96.002	132.45	-27.6										95.0783	155.85	-27.57		95.8645	440.275	-28.28
96.0182	132.76	-27.19										95.0987	156.35	-28.06		95.8679	440.325	-28.65
96.0422	133.26	-27.33										95.1192	156.85	-27.79		95.8712	440.375	-29.54
96.0644	133.68	-27.22										95.1282	157.07	-26.64		95.8746	440.425	-28.87
96.1142	134.65	-27.45										95.1396	157.35	-27.94		95.878	440.475	-28.77
96.1277	134.9	-27.23										95.1601	157.85	-27.21		95.8813	440.525	-28.75
96.1462	135.25	-27.49										95.1805	158.35	-27.35		95.8847	440.575	-28.74
96.1623	135.55	-27.85										95.1895	158.57	-26.84		95.8881	440.625	-28.62
96.1943	136.14	-27.64										95.201	158.85	-27.01		95.8914	440.675	-28.88
96.2136	136.49											95.2214	159.35	-27.45		95.8948	440.725	-28.81
96.2338	136.88	-27.49										95.2419	159.85	-27.18		95.8982	440.775	-29.03
96.2414	137.07											95.2509	160.07	-26.99		95.9015	440.825	-29.17
96.2538	137.31	-27.66										95.2623	160.35	-27.38		95.915	441.025	-28.74
96.2835	137.85	-27.35										95.2787	160.75	-27.59		95.9183	441.075	-28.71
96.3035	138.26	-27.61										95.2991	161.25	-27.4		95.9217	441.125	-29
96.3225	138.65	-27.47										95.3204	161.77	-27.89		95.9352	441.325	-28.82
96.3566	139.27	-27.21										95.3384	162.21	-27.41		95.9385	441.375	-29.2
96.387	139.86	-26.42										95.3597	162.73	-26.92		96.1492	444.505	-28.57
96.4152	140.39	-27.14										95.3719	163.03	-26.31		96.1626	444.705	-28.86
96.426	140.6	-27.05										95.3793	163.21	-27.19		96.1694	444.805	-28.52
96.4494	141.15	-27.13										95.4001	163.72	-27.24		96.1761	444.905	-28.55
96.4818	141.77	-25.45										95.4194	164.19	-26.84		96.1828	445.005	-28.48
96.5048	142.27	-26.23										95.4357	164.59	-26.36		96.1896	445.105	-28.47
96.5254	142.71	-24.98										95.4415	164.73	-27.08		96.1963	445.205	-28.25
96.5559	143.37	-26.85										95.4623	165.24	-27.23		96.203	445.305	-28.49
96.5728	143.73	-26.8										95.4836	165.76	-27.34		96.2098	445.405	-28.54
96.5801	143.89											95.502	166.21	-27.47		96.2165	445.505	-28.77
96.5957	144.21	-27.4										95.5343	167	-27.19		96.2232	445.605	-28.46
96.6171	144.63	-27.6										95.5547	167.5	-27.44		96.2299	445.705	-28.6
96.6304	144.885	-27.88										95.5605	167.64	-26.61		96.2367	445.805	-27.92
96.6521	145.33	-27.54										95.5752	168	-27.32		96.2458	445.94	-28.52
96.6741	145.75	-27.75										95.5956	168.5	-27.45		96.2501	446.005	-27.83
96.7028	146.46	-27.67										95.6161	169	-27.77		96.3376	447.305	-27.81
96.715	146.7	-27.52										95.6239	169.19	-27.01		96.36	447.435	-28.1
96.742	147.23	-26.99										95.6365	169.5	-27.42		96.375	447.535	-27.29
96.7741	147.86	-27.5										95.657	170	-27.09		96.3872	447.635	-26.3
96.7929	148.23	-27.06										95.6774	170.5	-26.94		96.3994	447.735	-27.42
96.827	148.9	-27.3										95.686	170.71	-26.38		96.4117	447.835	-25.9
96.857	149.49	-26.78										95.6979	171	-27.05		96.4239	447.935	-28.24
96.8611	149.57	-26.29										95.7183	171.5	-27.17		96.4361	448.035	-28.2
96.8906	150.15	-27.15										95.7388	172	-27.25		96.4483	448.135	-28.19
96.8957	150.25	-27.12										95.7494	172.26	-26.45		96.4605	448.235	-28.3
96.9085	150.5	-27.3										95.7592	172.5	-27.14		96.4727	448.335	-28.25
96.924	150.805	-27.03										95.7768	172.93	-27.04		96.4849	448.435	-28.3
96.9441	151.2											95.8	173.36	-27.09	X	96.4971	448.535	-28.02
96.9772	151.85	-27.6										95.9297	173.76	-26.49		96.5093	448.635	-27.7
97.023	152.75	-27.66										95.9676	173.88	-26.71		96.5215	448.735	-26.9
97.0342	152.97	-25.98										96.0815	174.24	-27.37		96.5362	448.855	-27.6
97.0382	153.05	-27.15										96.2049	174.63	-27.2		96.5606	449.055	-24
97.0484	153.25											96.36	175.13	-26.62		96.57	449.155	-28.32
97.4606	153.51	-26.02										96.3597	175.29	-25.89		96.585	449.255	-28.6
97.4844	154.5											96.361	175.38	-26.64		96.5972	449.355	-28.28
97.4893	154.7	-26.45										96.3646	175.63	-26.83		96.6095	449.455	-28.1
97.5073	155.45	-26.42										96.3719	176.13	-26.19		96.6217	449.555	-28.31
97.5259	156.22	-26.29										96.3791	176.63	-26.31		96.6339	449.655	-28.1
97.5502	157.23	-25.85										96.3796	176.66	-25.82		96.6461	449.755	-28.79
97.5802	158.475	-26.5										96.3864	177.13	-25.82		96.6583	449.855	-28.8
97.603	159.435	-25.92										96.3936	177.63	-26		96.7316	450.455	-28.88
97.6158	159.95	-26.15										96.4004	178.1	-25.87		96.7621	450.705	-28.2
97.6397	160.94	-26.25										96.4009	178.13	-26.06		96.7743	450.805	-28.18
97.6601	161.79	-26.33										96.4038	178.33	-25.34		96.7865	450.905	-28.5
97.6903	163.04	-26.3										96.4135	179	-26.03		96.7987	451.005	-28.44
97.7013	163.5	-26.41										96.4207	179.5	-24.54		96.8109	451.105	-28.5
97.7128	163.975	-26.01										96.426	179.86	-25.19		96.8231	451.205	-28.73
97.7409	165.14	-26.12										96.428	180	-25.83		96.8353	451.305	-28.4
97.7495	165.5	-26.26										96.4286	180.04	-25.02		96.8476	451.405	-28.53
97.7826	166.87	-26.45										96.4352	180.5	-25.63		96.8598	451.505	-28.6
97.8139	168.17	-26.03										96.4425	181	-25.95		96.872	451.605	-29
97.84	169.27	-26.11										96.4495	181.48	-24.33		96.8842	451.705	-28.6
97.8455	169.48	-24.67										96.4497	181.5	-25.23		96.8964	451.805	-28.6
97.8696	170.48	-26.31										96.457	182	-25.33		96.8964	451.805	-28.82
97.8944	171.51	-26.44										96.4642	182.5	-25.31		96.9086	451.905	-28.62
97.9186	172.515	-26.01										96.4712	182.98	-24.4		96.9208	452.005	-28.4
97.9421	173.49	-26.17										96.4715	183	-25.24		96.9574	452.305	-28.17
97.9667	174.51	-26.13										96.4787	183.5	-25.57		97.0136	452.765	-28.4
97.9681	174.57											96.486	184	-25.44		97.0258	452.865	-28.43
97.9896	175.46	-26.66										96.4933	184.5	-25.77		97.0624	453.165	-27.61
97.9905	175.5	-26.4										96.4937	184.53	-24.86		97.0869	453.365	-28.24
98.0137	176.46	-26.69										96.4983	184.85	-25.51		97.1113	453.565	-28.3
98.0375	177.45	-26.19										96.5019	185.1	-25.58		97.1357	453.765	-28.6
												96.5056	185.35	-25.13		97.1601	453.965	-28.2
												96.5092	185.6	-25.64		97.3066	455.165	-27.91
												96.5128	185.85	-25.57		97.3677	455.665	-27.96
												96.5147	185.98	-24.98		97.3921	455.865	-28.16
												96.5164	186.1	-25.37		97.4043	455.965	-28.6
												96.5169	186.13	-24.79		97.4165	456.065	-28.33
												96.5201	186.35	-25.71		97.4287	456.165	-28.6
												96.5237	186.6	-25.91		97.4532	456.365	-28.7
												96.5259	186.75	-24.98		97.502	456.765	-28.8
												96.5273	186.85	-25.65		97.5264	456.965	-28.8
												96.531	187.1	-25.5		97.5508	457.165	-28.9
												96.5346	187.35	-25.73		97.5692	457.315	-28.8
												96.5353	187.4	-25.27		97.5936	457.515	-28.9
												96.5382	187.6	-25.86		97.618	457.715	-28.7
												96.5455	188.1	-25.78		97.6424	457.915	-28.9
												96.5527	188.6	-25.99		97.6668	458.115	-28.7
												96.56	189.1	-26.2		97.6913	458.315	-28.8
												96.561	189.17	-26.25		97.7157	458.515	-28.7
												96.57	189.6	-26.69		97.7401	458.715	-27.4
												96.5814	190.58	-26.18		97.7645	458.915	-28.5
												96.5862	190.91	-26.63		97.7889	459.115	-28.8
												96.5934	191.41	-26.98		97.8134	459.315	-29.1
												96.603	192.07	-26.22		97.8378	459.515	-28.9
												96.6062	192.29	-26.96		97.8622	459.715	-28.5
												96.6145	192.86	-26.56		97.8866	459.915	-28.6
												96.6152	192.91	-26.11		97.9171	460.165	-28.7
												96.6226	193.42	-27.04		97.9721	460.615	-29.1
												96.6307	193.98	-27.04		97.9965	460.815	-28.6
												96.6311	194.01	-26.37		98.0209	461.015	-28.6
												96.6403	194.64	-26.68		98.0454	461.215	-28.8
												96.6484	195.2	-26.18		98.0698	461.415	-28.7
												96.6493	195.26	-26.97		98.0942	461.615	-29
												96.6558	195.71	-26.52		98.1186	461.815	-29.6
												96.6671	196.49	-26.25		98.143	462.015	-29.2
												96.6686	196.59	-26.75		98.1675	462.215	-28.9
												96.6835	197.62	-27.32		98.1919	462.415	-28.9
												96.6847	197.7	-26.66		98.2163	462.615	-29
												96.6899	198.06	-26.92		98.2407	462.815	-28.7
												96.6929	198.27	-26.39		98.2651	463.015	-28.8
												96.698	198.62	-26.48		98.2896	463.215	-29.1
												96.7022	198.91	-26.96		98.314	463.415	-28.8
												96.7131	199.66	-26.12		98.3384	463.615	-28.8
												96.7163	199.88	-26.86		98.3689	463.865	-27.67
												96.7232	200.36	-26.4		98.3872	464.015	-28.21
												96.7289	200.75	-26.71		98.4117	464.215	-28.27
																98.4361	464.415	-28.34
												96.7364	201.27	-25.89		98.4605	464.615	-28.3
												96.7384	201.41	-26.71		98.4849	464.815	-28.51
												96.7511	202.28	-26.47		98.5093	465.015	-28.33
												96.7566	202.66	-26.52		98.5338	465.215	-28.39
												96.7571	202.7	-25.87		98.5582	465.415	-28.53
												96.7638	203.16	-26.87		98.5826	465.615	-28.05
												96.7711	203.66	-26.91		98.607	465.815	-26.61
												96.7783	204.16	-27.39		98.6314	466.015	-28.07
												96.7817	204.39	-26.6		98.6339	466.035	-28.6
												96.7856	204.66	-27.42		98.6583	466.235	-28.9
												96.7895	204.93	-26.56		98.6827	466.435	-28.4
												96.7919	205.1	-26.9		98.7071	466.635	-26.9
												96.7928	205.16	-26.49		98.7316	466.835	-28.3
																98.7682	467.135	-28.2
												99.1149	206.68	-25.03		98.7865	467.285	-28.1
												99.124	207.31	-25.24		98.8109	467.485	-27.9
												99.1407	208.46	-24.89		98.8353	467.685	-27.7
												99.1481	208.97	-25.57		98.8598	467.885	-28.2
												99.1571	209.59	-25.42		98.8842	468.085	-28.1
												99.1852	211.53	-25.15		98.933	468.485	-28.2
												99.1863	211.61	-25.01		98.9611	468.715	-28.2
																98.9855	468.915	-28.4
																99.016	469.165	-28.4
																99.0405	469.365	-28.4
																99.0649	469.565	-28.2
																99.0893	469.765	-28.3
																99.1137	469.965	-28.2
																99.1381	470.165	-28.4
																99.1626	470.365	-28.4
																99.187	470.565	-28.5
																99.2114	470.765	-28.6
																99.2358	470.965	-28.5
																99.2602	471.165	-28.3
																99.2847	471.365	-28.6

## Sheet: Iona-1 palynology
Depth	Leiofusa spp.	Micrhystridium spp.	Scuticabolis lapidaris	Veryhachium spp.	TOTAL ACRITARCHS	Cyclopsiella spp.	Palambages spp.	Paralecaniella indentata	?Desmid-like microalgae	Botryococcus spp.	Lecaniella foveata	Pediastrum spp.	Spicadinium akidoton	Crassosphaera spp.	Cymatiosphaera spp.	Leiopsophosphaera spp.	Leiosphaeridia spp.	Leiosphaeridia? spp. (pilae)	Leiosphaeridia? spp. (scabrate)	Pterospermella australiensis	Pterospermella spp.	Pterosphaeridia spp.	Tasmanites spp.	TOTAL ALGAL	Acanthaulax wilsonii	Achomosphaera ramulifera	Achomosphaera sagena	Adnatosphaeridium spp.	Adnatosphaeridium tutulosum	Adnatosphaeridium? chonetum	Alisogymnium euclaense	Alterbidinium montanaense	Alterbidinium spp.	Apteodinium deflandrei	Apteodinium maculatum	Ascodinium cf. ovatum sensu Dodsworth 2016	Atopodinium haromense	Batiacasphaera spp.	Bosedinia cf. sp.1 & sp.3 Prauss 2012	Bosedinia spp.	Bosedinia? spp. (grana)	Callaiosphaeridium asymmetricum	Canningia reticulata s. l.	Cassiculosphaeridia reticulata	Cauca parva	Chatangiella decorosa	Chatangiella spectabilis	Chatangiella spp.	Chichaouadinium? cf. vestitum
	AC	AC	AC	AC		AL	AL	AL	ALFW	ALFW	ALFW	ALFW	ALFW	ALPR	ALPR	ALPR	ALPR	ALPR	ALPR	ALPR	ALPR	ALPR	ALPR		DC	DC	DC	DC	DC	DC	DC	DC	DC	DC	DC	DC	DC	DC	DC	DC	DC	DC	DC	DC	DC	DC	DC	DC	DC
5.85					0																			0
7.91					0						1			1			7				1		3	23		1					3					1			1	2			1				1	1
8.78					0										1		6				4		4	26																									1
10.79					0					1							2				1			7										2														1
12.84					0									2	2		9				8		8	50							1	2				4			5	1			1			1	1	2	3
14.15					0			1		1					2		10				6	1	3	44								1	2	1		1			3				1				2	2	2
15.84		2			2									1			2			1	2		2	14		1							1	1					1	1				1			2	1	1
17.78		1			1		1			1							1						1	5		1								1					1	2				1			3	1
18.67					0			1						1			3				1		1	13		1					1			2					1	2			1	1			2	1	1
20.65		2			2			3									3							12										1	1				1	2		1					1
21.93		1		1	2										1								1	3		1								1					1
24.87			1		1		1	2		1			1 ?		1		5				3		1	25		1								1		1			1	1			2
25.93					0					1							2				1		1	8							1			2			1		1					1					1
28.44		1		1	2			1								1	8			1	3		1	29										1					1	3			2	1			1		1
29.73					0			1							1		6				3			22										1		1			2	1								1
31.42		2			2					2							5				2		1	17										1	1				1	3			1						1
35.03		1		1	2			1							1		1				1		1	9										1		1			4	2		1
37.89		1			1		1																	1															1	2			1	1			2		2
36.08		1			1									1			13				2		2	34		1					5			3		3			15				1					1	4
40.35					0									1							1		1	5							1		1	1					1	1							1	1	2
41.69					0			1		1							2				1		1	10										1					3			1
41.89		1			1		1			1							3				4		4	20										1					2	2			3						1
42.53					0			1						1	2		19			1	19	1	9	97										1					9	10			2				1	1	2
43.23					0			1									6				1		1	17									1			1		1	2	1						1		1	1
44.18					0		1	2						1	2		12				11	1	8	67										1					14	18			2						2
44.6		1			1									1	5		8				10		11	59								1							3	2			6					1	7
45.72					0		1								1		11				26	1	20	99								1				1			9	5			12				1		3
46.65					0					1				3	2		12			1	38	1	31	146												5			3	5			11				1		2
47.59					0			1	1	1				1	2		11				18		12	80												2			12	8			12
48.7					0			2						1		1	6			1	17		14	70		1										1	1		3	3							2		4
49.88					0			1						1	1	1	15				21		19	99															5	3			2						2
50.63					0			1		1						1	17				13		8	73															7	6			1				1		1
51.54					0		1	1							1		17				8		13	68															1	1
52.57					0			1									18				14		26	92										1		1			5	3			1
53.75					0					1				1	1		7				4		5	32															3	3							3	2	2
54.76					0		1			1					1	1	13				8		8	56												1			7	4			1
55.16					0			1		1						2	12				8		12	59												1			12	5			3	1					2
55.82					0			3						1	1		4				11		16	56															9	2				1					1
56.61					0			1								1	8					2	9	33															4	2			1
57.09					0			1								2	6				9		12	48										1					3	2			2
57.3		1		1	2					1							1				2		3	10										1					1				1						1
58.44					0									3			21			1	8		11	77												2			6	1			3						8
58.74		3			3			1		2							1				3		1	13			1												6				1					1	1
59.88					0										1		5				7		4	30										1					3				2
60.35		1			1			1						1	1		9				7		3	41															2				1
60.93					0			2						1	1	2	14				8		5	61												4			36	2			4
61.14					0										1	1	7				5		5	33												13			55				6
61.63		4			4					3		1			2		8				5		4	38												1			12										1
62.49		1			1			1					1 ?	1	1	1	7				4		6	36												1			10	6			1						6
63.27		1		1	2			1						1	1		3				3		1	19										1					7	2			1						1
63.9		2		1	3					1							2				1		1	8		1	1							1					2	1
64.5				2	2			1		1				1			5				2	1	3	24			1							1					2	1
65.12		1		1	2					2				1	1		5				9		9	43												3			12	4									1
65.8		1		1	2												1				1		1	5			1					1							2				1				1	1	2
66.49	1			1	2					2				1	2		2				1		1	15										1					4	1			1
67.53		1		1	2					1							1						1	4			1										1		3	1			1
68.09		1			1										1		4				4	1	2	22		1										2			18	1		1	5
69.03					0										1	1	8				10	1	6	48										1		1			5	2			3
69.86					0										1		5				3		3	21		1	1							1		1			3	2			3						1
70.45					0			1						1		1	19				4		5	57							1					1			3	4			7						8
71.15		1			1									1	2	3	8				8		9	53										1					9	3			4						2
71.83					0					2					1		3				1		1	13										1					6	1			1
72.51					0			1									3				1		1	11		1								1					4				2						1
72.77					0										2	1	11				4		4	40										1		1			5	1			2						3
73.6					0											1	14				7		3	47															4	1			2						3
74.25					0									1		3	18				4		3	55												2	1		6				4						2
74.5					0			1							2	2	18			1	10		7	75												1			8	3							1		2
75.06					0			1							1		4				1		1	15										1		1			6	1			1	1					1
75.88					0										1		3				2	1	3	17									1				1		5	2			1	1					1
76.59					0			1		1						2	4				1		1	18		1											1		1				1						2
77.6					0				1	1				1	4	1	17				15		8	86												2			12	4									4
78.05					0			1							4		4				4	1	2	30													1		1	1				1					1
78.28					0			3						1	2		19				7		13	77										2		1			5	5			1						8
79.51					0									1		1	6				1		2	20		1								1	1				10	2			2
80.25					0										1		8				2		2	24												1			5	4			2	1					1
80.48					0					1		2			1		10	1			5		3	40												2			17	16				1					12
81.4		1			1			2									1							6		1													6	1									3
82.46				1	1												9	1			1		1	23		1								1		1	1		12	4			3						6
82.67					0			1	1	1						1	11	1			8		3	49										1		4			18	5									8
83.32					0			2		2					2	1	11	1			2		4	44												3			16	2			3	1					7
84.1					0					1							4				1		2	13		1	1						1	1			1		10
84.3					0			2							1		11	1			5		2	42										1		2			14	2			2	1					6
85.31					0					1				1	4		7				6		3	40												1			9	3			1						12
86.65					0							1		1		1	9	1			1		1	28		1							1 ?	1		2			9	1			1					1	9
87.74					0					1		1			1		7	4			1		1	29		2								1					4	1			2						13
87.88					0			1						1		1	4				4		5	27												1			2	4			2						20
88.77					0			1							1		5	2		1			1	21		1	1			1						1			3				1						8
89.32		2			2					2					1		4	1			2		2	20		1							1						6	2									13
89.6					0			1							1		8	1			4		1	31												2			6	2									12
90.57		1		1	2			1		1							6	6			2		2	33											1				7	4									5
90.83					0							1				2	12	1			5		2	43										1					4	1			1						4
91.74					0												2				1		1	7		1								1					5	1			1						1
92.73					0							1			1	2	6				2		1	24												1			6	2									2
93.44					0			1		4		1				1	10				1		1	32		1				1						1			11	3				1					2
94.22					0			1							1	2	5				1		2	22															2	2
94.73					0			1									4				1		1	13									1	1		1			9	2									1
95.31					0			1							1	1	4				1		2	18										1					7	4			1						3
96.1					0												7				2		1	19		1								1					2										2
97.41				1	1			1							1		5				2		1	19		1								1		1			4
98.08					0			1						1	1	2	5				4		2	30												2			6	5			1						11
98.56					0					2					1	1	4				2		2	20		1								1		1			4										1
99.82					0			2									3						1	11		1													5	3
100.3				1	1			1							1		1				1			8										1					6	3				1					1
100.9					0			1	1			1			1	1	15				5		7	55															9	1									11
101.83					0				1	1					2		10				3		6	38												3			11										6
102.21					0					1					2	1	6				6		7	38															11	5			1
102.95				1	1										2		4				1		1	15										1		3			4	2			1
103.44			1	1	2					1			1 ?		1		10		1		2		2	31															6	1			1						1
104.18			1	1	2												10		2		1	1	2	30					3							2			7				1
104.83			1		1			1		1							6				2		1	20		1										1			1					1					1
105.69		1	1	1	3										1		3		3		2		2	20		1										1	1		9	1	1								3
106.45		1	1		2			2		1							14		1		4	1	9	54		1							1 ?			2	1		21	3			1						3
106.94			1		1					1						2	15		2		7		9	62		1										2			33	2			1						6
107.17	2		1	1	4			1							1	1	8		1		1		2	28		2								1			1		17	1			1						6
107.82	1		1		2					1				1	2	2	17				7		9	68		1				1						2	1		14	5	1		1						4
108.77					0									1	1	1	34			1	10	1	20	118												6			22	1			2						10
109.22			1		1											1	12				4		1	35										2		8			20	2			1						3
110.01					0			1							2	2	20		1		10		11	83									1			5			17	1			2					1	1
110.49		1	1	1	3										3	5	23		2	1	15	1	7	107		1							1			3			13	2									4
111.36		1			1									1	7	3	17		2	1	22	1	8	116												3			8	1									3
111.88		1	1	1	3									1	3		25		2	2	19	2	6	114												3	1		28										1
112.45					0					1					6	3	32		2	1	20	1	11	142												7			37	5
112.77					0			2						1	2	2	29		2	1	17	2	15	131												8			30	7									4
113.42					0			1		1		1			4		24		3	1	30	1	13	143												4			20	3									3
114.04					0									2		1	47		14		10	1	21	171															15
114.45					0			1							1	2	32		13	2	20	1	14	158												3			14	5								1
115.45					0			1				1		1	3	3	29		6	1	23	2	16	155												20			45	1									1
116.15			1		1			1		1				1	3	1	40		20		15	1	13	178												5			18	13									1
116.76			1		1			3						1	1	5	34		21	2	18	1	11	183												5	1		18	3
117.21					0			1	1						1		27		28	2	12	1	12	157												3			23	2
118.16					0									3	3	6	40		4	1	13	1	16	158												3			13	4			1 ?						2
119.49					0			1						7	7	4	20			2	13	1	6	116												6			23	3									2
119.77					0			1						4	3	3	22				18	1	15	119												14			44	5
120.4					0				1				1 ?	4	2		10			1	9	1	6	61												12			60	3									1
121.09					0									6	2	5	17			1	16	1	7	103												10			58	1									7
121.51					0			1		1				10	6		15			1	19	1	15	122												15			62										3
122.18					0									8	8	1	6				10	1	6	74												8			55										3
122.91					0			1						3	6	2	28				19	1	10	130												3			74										5
123.14					0			1						4	4		18			1	13	1	12	96												7			66	1									3
123.68					0					1				1	5		13			1	8	1	1	60									1			4			74
124.03					0									3	5	1	14			1	11	1	10	82												4			60										3
125.13					0									2	3	1	17				13	1	6	80									1			6			65	1									5
126.33					0			1						1		1	6				5	1	6	36												5			82	2
127.31					0									1		1	5			1	1		2	20												7			82
127.77					0									1			24				2	1	12	68												8			88
128.36					0									1	2		18			1	7	1	7	67										1 ?		4			73
129.27				1	1									1	3		8				8	3	7	53												16			48	1									2
130.17					0									3	1		7			3	6	1	2	44												5			83
130.74					0									1			5				7	1	10	38										1		9			84
131.52					0			1						2	2		5				5	1	6	38												11			60	1
132.45					0									1	2		9			1	9	1	3	49												7			72										1
132.76					0			2						2	8	1	7			1	10	1	3	67												14			49	1
133.68					0									1	5	2	12			3	15	1	7	85												12			25	2
134.65					0		1							3	6		30			2	20	1	12	137												14			33				1						1
135.25					0			1						1	10		27			3	10	1	11	117												6			16	1			7						1
136.14					0									1	3	1	20			1	17	1	11	99												1	1		8	1			23						2
136.88					0									6	3	3	31			1	27	2	21	167												2			46				3						1
137.31					0					1				3	3		25			2	40		15	162												4			38	1			1						2
137.85					0			1						1	1		74			1	11	1	12	192												2			22	1									1
138.65		1			1										1		9				12		12	56		1										4			14	2			1	1					4
139.27					0										4		23			1	30		22	138												2			21	1
139.86					0										1	1	17				29	1	9	107												2			17										3
140.39					0			1							4		11				11		10	64												8													2
141.15					0			1							2		23			1	30		16	130												5			24	4									3
141.77					0										3		23				14	1	10	92												1			7
142.27					0										1	1	31				14	1	18	114												4			23	4									2
142.71					0					1		1			1	3	32				27		14	142												2			7										6
143.37					0			1						1	2	3	40			1	28	2	17	173												1			6										2
144.21		1			1										1		34			1	39		6	156		1													1
144.63					0									1	5	7	31			1	37	1	16	182															1										3
145.75					0										4	1	38			1	22	1	21	155									1			8			22										4
146.46					0			1							2		38			1	32	1	20	170												1			7	3			1						1
146.7				1	1										6		20			1	7	1	8	78												2			5				47
147.23					0					1					3	1	33				13	1	23	126												1			8
147.86			1		1									1	3	5	50			1	14	1	23	173												1			5										1
148.23		1			1										1	1	25				15		38	122												5			9	3									3
148.9					0										1		70				14		14	184															2										1
149.49		1			1										5	1	51			1	14	1	17	163															2										1
149.57					0					3					3	5	49			1	22		11	174															4	2
150.15					0			1		1					1		62			1	20		11	182															11	2									3
150.5					0			1							6	1	47			2	23		12	172												2			5
151.85					0					1					1		48			1	28		20	177																1									1
152.75					0			1							3		58			2	17		15	177															3	1
152.97				1	1			3		1		1			1		31			2	18		18	130												2			5	2									1
153.05		1			1			8							1		28			1	16	1	18	128		1												1	5	3									3
154.7		12		3	15												2						1	5				1											4
157.23		1		1	2																3		1	7		1								1	1	1		1	1			1 ?
159.435		2			2																1			2		1								1		1			2										1
161.79		1		1	2												1						2	4		2								1					1
165.5	1	3		1	5	1									1						1			6										2				1
166.87		2		1	3												5						1	11		1													4						1				1
171.51		1		1	2							1									1			3	1 ?	1								1					1			1			1
174.51				1	1												1			1				4		1
174.57		2		1	3												1						1	3		1							1	1	1														1
177.45		2		1	3			2							1		4				2		1	19		1	1						1			1			11										2
Categories:
AC - ACritacrh
AL - ALgae (miscellaneous)
ALFW - ALgae Fresh/brackish-Water
ALPR - ALgae PRasinophyte
DC - Dinoflagellate Cyst (DinoCyst)
FT - Foraminiferal Test linings
FU - FUngal spores & hyphae
MP - Miscellaneous Palynomorphs
SP - Spores & Pollen
LY - LYcopodium spores added & associated concentration calculation data
OM- Organic Matter (100 kerogen point count)
AB - ABsolute abudance, i.e. concentration
AR - AReoligeracean dinocyst concentration
DG - DinoGymnioidean dinocyst concentration
GC - Gonyaulacoid dinocyst Concentration
PC - Peridinioid dinocyst Concentration
PG - Palynomorph Group (% from initial 100 specimen count)
SG - Sporomorph Group
[truncated: 294 more columns]

## Sheet: Innes-1 palynology
Depth (m)	Leiofusa spp.	Micrhystridium spp.	Scuticabolis lapidaris	Veryhachium spp.	Total Acritarchs	Cyclopsiella spp.	Palambages spp.	Paralecaniella indentata	?Desmid-like microalgae	Botryococcus spp.	Pediastrum spp.	Crassosphaera spp.	Cymatiosphaera spp.	Leiopsophosphaera spp.	Leiosphaeridia spp.	Leiosphaeridia? spp. (pilae)	Leiosphaeridia? spp. (scabrate)	Pterospermella aureolata	Pterospermella australiensis	Pterospermella spp.	Pterosphaeridia spp.	Tasmanites spp.	Total Algae	Acanthaulax wilsonii	Achomosphaera ramulifera	Achomosphaera sagena	Achomosphaera spp.	Adnatosphaeridium spp.	Adnatosphaeridium tutulosum	Adnatosphaeridium? chonetum	Alisogymnium euclaense	Alterbidinium montanaense	Alterbidinium spp.	Apteodinium deflandrei	Apteodinium granulatum	Apteodinium maculatum	Atopodinium haromense	Ascodinium cf. ovatum sensu Dodsworth 2016	Bosedinia cf. sp.1 & sp.3 Prauss 2012	Bosedinia? cf. sp. 1 & sp.3 (antapical node)	Bosedinia cf. sp.1 & 3 + ant. node + A. cf. ovatum	Bosedinia spp.	Callaiosphaeridium asymmetricum	Canningia reticulata s. l.	Cassiculosphaeridia reticulata	Chatangiella spectabilis	Chatangiella spp.	Chichaouadinium? cf. vestitum	Chlamydophorella discreta
	AC	AC	AC	AC		AL	AL	AL	ALFW	ALFW	ALFW	ALPR	ALPR	ALPR	ALPR	ALPR	ALPR	ALPR	ALPR	ALPR	ALPR	ALPR		DC	DC	DC	DC	DC	DC	DC	DC	DC	DC	DC	DC	DC	DC	DC	DC	DC	DC	DC	DC	DC	DC	DC	DC	DC	DC
12.26					0	1		1							1					1			4			1					1	1		2			1		1		1	4		1		1	1
13.58					0		1	1		1					4					1			8			1	1							2							0		1	1		1	1		3
17.45					0							1			7					1		2	11																1		1	1		2	1		1		2
18.5				1	1								1		1								2	1		1	1							2							0			2					1
22.5					0		1			1					1								3			1								1							0		1
24.24		1			1					1			1		1								3				1					1		2							0	1				3	2		2
25.35		1			1					1					1					1		1	4																		0					2	1		1
25.98			1	1	2			1		3			1		4					1	1	1	12									2		1					5		5	2		4		4	2		1
26.73					0					3			1		8		1	1	1	5		5	25											1			1		6		6	2		2		1			2
28.71				1	1		1	1				1	1	1	8			1	2	14		6	36		2									1				1	3		4			2		1	2		2
29.38					0							1	3		9			3	2	45		10	73		1														1		1
30.22					0					1				1	7			2	1	15	1	11	39											1				5	23		28								1
31.52			1		1		1							2	7		1		2	6		2	21											1				4	24		28								2
32.15					0			1					1	1	12			1		13		5	34										1	1					5		5					1
33.3				1	1			2		1	1			6	8			1		11	1	10	41																12		12	1	1						1
34.6			2		2										8			1		2		4	15									1	1						2		2					1	1
35.35				1	1			1					1		12					10		2	26														1		5		5	1		1		1	1	2
36.12				1	1										4					2		1	7		1				1 Rw ?					1					2		2			1	2
37.15				1	1			3		1			1	3	3			1		3		7	22																4		4			1		1
37.6		1	1	2	4										5			1		1		1	8				1												1		1			1		2	1	2	1
38.31		1		1	2								1		2					3		2	8																1		1			1				1
39.29					0								2		9				1	10		1	23																5		5			2		1	1
39.85				1	1								1	2	3			1		2	1	2	12		1		1											1			1		1	1		1
40.32		2			2			1		3					15					6		2	27										1						2		2			1		1
40.55		1		1	2			1					1		4			1		1			8				1						1						3		3			1		1
41.04				1	1								1		13			1	1	11		3	30		1													1	4		5	3						4
41.2		1		2	3					2				2	6					1		1	12																4		4	4		1
41.78		1		1	2								1		16				1	2		4	24																5		5	5		3	1	1	1	2
42.05		1		2	3			2					1		7					1		1	12				1												1		1	1		1
42.18				1	1																		0										1	1							0			1	1	1
42.51		1	1	1	3			1		2			1	1	6					2		2	15				1							1							0	2				1	1		1
42.63					0			1				1			5				1	1		1	10	1										1					4		4	2		1		1
42.84		1			1			2							4					1		1	8																2		2	1		1		1	1
42.95					0									1	1								2															1	1		2			1				1
43.42		1			1			2		1					1		1			2		3	10				1					1		1					2		2	1				1		1
43.52					0			1							5					1		1	8		1																0			1				1
43.78		1			1			1							4					1			6											1					2		2	2		1				1
43.9					0			1							1				1				3		1									2					5		5	1		1
44.18					0					1				1	3					1			6		1									1					1		1			1
44.35		1			1			1		2					2							2	7											1					6		6	1		1					1
44.62				1	1									1	3								4		1														1		1			1
44.8					0								1		1					1		1	4											1					2		2	1		1					1
44.88					0				1	1			1	3	9			1		8		4	28																2		2	2						1
44.98			1		1												1	1		1	1	1	5		1																0			1
45.33			1		1									1	2		1			1		1	6		1									1							0			1					1
45.92					0			1					1		1					1			4		1									1					2		2	2
46.92					0			1						1	4		1		1	2		3	13		1														2		2	3							1
47.1				1	1			2							3							1	6		1									1					3		3	1							1
47.25					0									1	3					4		2	10		1									1					2		2	2							3
47.36					0			1						3	8				1	3		2	18		2						1					1			3		3	2		1
47.5					0									2	3		1			1		1	8		1									1					1		1			1
48.1			1		1			3					1		3		3			2		1	13		1					1				1					12		12	2		1				1
48.33		1			1			1							5		1		1	4		6	18			1													2		2	2						1
48.43				1	1			1	1					1	11			1		4			19							1									1		1	3		1				1
48.75					0									1	8		1	1		2		1	14		1					1								1	3		4	1							2
49.27					0					1	1	1			3				1			3	10		1									1							0	1		1				1	1
49.81					0			1							1					1		1	4															1	4		5	2						1	1
50.22				1	1			1		1					4			1	1	1		1	10		1					1									5		5	1							3
50.5					0								1		15		20			1		1	38		1				2	1									1		1							2
50.77			1	1	2			1		1					8		1			2		1	14						1	1				1					3		3								1
51.08					0										3		11			1		1	16		1	1			1	1				2					1		1
51.25			1		1								2		5		41			1		1	50						4					2					2		2			1					1
51.65			1		1			1					1		8		20						30						1										2		2								1
51.9			1		1										2		4						6		1				1	1				1		1			4		4			1				1	2
52.13		1			1										1		1			1			3								1			1				1	1		2								1
52.43					0										2		3						5		1				1					1							0			3				4	1
52.6			1	1	2									1	1		1	1		1		1	6		1				1									1	2		3			1					1
52.7				1	1										10		1	1	1	5		2	20		1														2		2			2
52.75			1		1		1						1		2		2			3		2	11		3									1					1		1							1	2
52.95				1	1								1		3		8					1	13		2									2							0			1				3	1
53.12					0			2							5		1	1		1		1	11		1									1					2		2	1	1	1					3
53.33	1				1				1	2			1	1	14		4	1		8		5	37															1	8		9	1						1	1
53.65					0					1			1		6			1		1		1	11		1													2	11		13	2		1					2
53.98					0			1	1			1	3	2	19		1	3	1	19		11	62																13		13							2
54.3					0			2		1			3	1	22			2	1	21		9	62															2	14		16							2
54.55					0			2					2	2	17				3	23	1	6	56																16		16	2
55.35					0			1				1	2	6	21			1	1	14	1	11	59															1	7		8
55.74					0					1		1	3	3	31				1	21	1	9	71																10		10	1						1
56.08					0							1	4	7	18				2	11	1	8	52										1						11		11							1
56.32					0								2	1	43		13		2	5		5	71																5		5	2						1
57.18					0			1				1	7	1	31		3		2	28	1	6	81									1							6		6	2
57.55					0							2	1	1	25		3	1	1	18	1	12	65																33		33	1
57.98					0					1		4	6	2	22		1	3		22	1	9	71																42		42	1
58.17					0			1				4	2	6	25				1	12	1	11	63															4	41		45							1
58.4					0			1				1	1	3	32			1	1	15		3	58															3	66		69
58.47				1	1					1		3	1	2	12				1	18	1	10	49															3	75	2	80
58.8					0							2	3	7	19			1	2	16	1	10	61							1								3	43		46
59.1				1	1			1				6	5	4	16				2	8		5	47															2	33	1	36	1
60.58					0					1		1	4	2	17			2	3	7	1	7	45															2	84	2	88
60.85					0					2		2	2	2	7			1	1	6	1	5	29																79	1	80			1
61.2					0					1		2	2	1	17	3			1	10	1	4	42		1									1				2	62	4	68
61.83					0							2	1	6	10				1	3	1	6	30		1													3	61		64
62.39					0							1	1	9	6		1		1	4	1	7	31															5	82	1	88
62.88					0							2	1		8			1	1	2	1	1	17															4	81	2	87	1
63.46					0							1	1	2	7			1	1	4		5	22		1													6	86		92
63.81				1	1								3	1	7				1	4		7	23																60		60							1
64.23					0								1	1	7			1	1	4		1	16															4	87	1	92
65.49					0							3	1	1	9			1	3	15	1	5	39															2	73		75
65.85					0							1	1	1	11			1	1	7	3	4	30		1													1	80		81							1
66.85					0					1		1	1	2	5				1	2	1	2	16		1													3	67	2	72
68.15					0			1				3	1	1	4				1	1	1	1	14															3	83	1	87
69.1					0							1	1	1	2			1	1	1	1	1	10															2	75		77
69.27					0			1	1			4	1		6			1	1	3		1	19		1			1		1								2	61	1	64
70.08					0					1		1		1	2			1	1	1		2	10															5	15	1	21	1
70.85					0			1				3			6			2	1	1	1	1	16															2	7		9
71.25					0			1					1	1	3			1	1	3	1	1	13															1	9	1	11
71.62					0							1	1		7			1	1	4	1	3	19		1			1											10		10
72.03					0							3	1	1	6			1	1	4		3	20															3	6		9
73.05					0							1	2		4			1	1	4	1	2	16															1	4		5	1							1
73.43					0					2		1	2		7			1	1	3		3	20															3	11		14								1
74.63				1	1							1	1	4	25			1	1	16	1	4	54			1												4	7		11
75.4					0					2		2	7	5	31				1	21	1	8	78															1	11		12								1
76.12					0									2	30			1		11		5	49																2		2	1
76.88					0			1					1	2	41			1	2	18	1	13	80															6	16		22
77.74					0			1		1			2		34			3	1	20		12	74															2	9		11	1
78.13					0					1			3	1	27			1	1	11		9	54																6		6	1
79.65					0					3			1	3	38			1	1	8		4	59																9		9	1
79.95					0				1	1				2	36				2	12		14	68																20		20	3
80.4					0					1					35			1	1	11		5	54															1	1		2
80.52					0			2		2				1	37			2	5	15		5	69																11		11	6							1
80.6		4		1	5								2						1	1			4		1									1		1					0
80.65		1		1	2			2							1			1		1		1	6		1														5		5	3							1
80.73		1		1	2																		0		1											1			1		1
81.2		2		3	5										1								1		2									1	1						0
Categories:
AC - ACritacrh
AL - ALgae (miscellaneous)
ALFW - ALgae Fresh/brackish-Water
ALPR - ALgae PRasinophyte
DC - Dinoflagellate Cyst (DinoCyst)
FT - Foraminiferal Test linings
FU - FUngal spores & hyphae
MP - Miscellaneous Palynomorphs
SP - Spores & Pollen
LY - LYcopodium spores added & associated concentration calculation data
OM- Organic Matter (100 kerogen point count)
AB - ABsolute abudance, i.e. concentration
AR - AReoligeracean dinocyst concentration
DG - DinoGymnioidean dinocyst concentration
GC - Gonyaulacoid dinocyst Concentration
PC - Peridinioid dinocyst Concentration
PG - Palynomorph Group (% from initial 100 specimen count)
SG - Sporomorph Group
[truncated: 259 more columns]

## Sheet: Well X palynology
depth (feet)	Depth (m)	Micrhystridium spp.	Veryhachium spp.	?Desmid-like microalgae	Botryococcus spp.	Pediastrum spp.	Crassosphaera spp.	Cymatiosphaera spp.	Leiopsophosphaera spp.	Leiosphaeridia spp.	Pterospermella australiensis	Pterospermella spp.	Pterosphaeridia spp.	Sphaeromorphs? (honeycomb texture)	Tasmanites spp.	Achomosphaera ramulifera	Adnatosphaeridium spp.	Adnatosphaeridium tutulosum	Adnatosphaeridium? chonetum	Ascodinium cf. ovatum sensu Dodsworth 2016	Atopodinium haromense	Bosedinia cf. sp.1 & sp.3 Prauss 2012	Bosedinia spp.	Callaiosphaeridium asymmetricum	Canningia reticulata s. l.	Cassiculosphaeridia reticulata	Chichaouadinium? cf. vestitum	Chlamydophorella spp.	Circulodinium colliveri	Circulodinium distinctum / Tenua hystrix	Cleistosphaeridium / Downiesphaeridium spp.	Codoniella campanulata	Cometodinium spp.	Corculodinium inaffectum sensu H.&T. 2003	Coronifera oceanica	Cribroperidinium spp.	Cyclonephelium compactum	Cyclonephelium membraniphorum	Cyclonephelium vannophorum	Dapsilidinium laminaspinosum	Dapsilidinium spp.	Desmocysta plekta	Dinoflagellate? type D Ioannides 1986	Dinogymnium albertii	Dinogymnium cretaceum	Dinogymnium spp.	Dinopterygium cladoides	Diplofusa gearlensis / Wuroia spp.	Dissiliodinium spp. (grana)
		AC	AC	ALFW	ALFW	ALFW	ALPR	ALPR	ALPR	ALPR	ALPR	ALPR	ALPR	ALPR?	ALPR	DC	DC	DC	DC	DC	DC	DC	DC	DC	DC	DC	DC	DC	DC	DC	DC	DC	DC	DC	DC	DC	DC	DC	DC	DC	DC	DC	DC	DC	DC	DC	DC	DC?	DC
5315.75	1620.24	0	0	0	0	0	0	0	1	5	0	1	0	0	1	1	0	0	0	0	0	0	0	0	0	0	4	0	0	2	1	0	0	3	1	0	1	2	0	0	0	0	0	0	0	0	1	0	0
5317.4	1620.74	0	0	0	2	0	0	0	0	11	0	2	0	5	5	0	0	1	0	0	0	3	1	0	0	0	9	0	0	3	0	0	0	8	0	0	0	0	0	0	0	0	0	0	0	0	0	0	0
5317.95	1620.91	0	0	0	1	0	0	0	0	4	0	2	0	0	1	1	0	0	0	0	0	2	1	0	0	0	3	0	1	4	0	0	0	7	1	0	1	1 ?	0	0	0	0	0	0	0	0	0	0	0
5318.4	1621.05	1	0	0	0	1	0	1	0	5	0	5	0	0	4	0	0	0	0	0	0	1	0	0	0	0	11	0	1	2	2	0	1	2	1	0	0	0	0	0	1	0	0	0	0	0	0	0	0
5319.7	1621.44	0	0	0	0	0	0	2	0	5	0	3	0	0	1	1	0	0	0	0	0	1	1	0	0	0	5	0	0	3	0	0	0	6	1	0	0	0	0	0	0	0	1	0	0	0	1	0	0
5320.9	1621.81	0	0	0	0	0	0	1	0	5	0	4	0	0	3	0	0	0	0	0	0	3	0	0	0	0	6	0	0	3	0	0	0	3	0	0	0	0	0	0	0	0	0	0	0	0	0	0	0
5321.3	1621.93	0	0	0	0	0	0	1	1	12	0	4	0	0	10	0	0	0	1 ?	0	0	1	1	0	0	0	2	0	1	3	0	0	0	7	0	0	0	0	0	0	0	0	0	0	0	0	0	0	0
5322.45	1622.28	0	0	0	0	0	0	0	0	3	0	1	0	0	0	0	0	0	0	0	0	0	0	0	0	0	0	0	0	1	2	0	0	3	1	0	1	3	0	0	0	0	13	0	0	0	0	0	0
5323.1	1622.48	0	0	0	0	0	0	0	0	5	0	1	0	0	1	1	0	0	0	0	0	1	1	0	0	0	1	0	0	3	0	0	0	4	0	0	1	2	0	0	0	0	1	0	0	0	1	0	0
5324.4	1622.88	0	0	0	0	0	1	0	2	14	0	5	0	1	11	0	0	0	0	0	0	4	0	1	0	0	0	0	1	1	0	0	0	8	0	0	2	1	0	0	0	0	0	0	0	0	0	0	0
5325.9	1623.33	0	0	0	0	0	0	1	0	7	0	3	0	0	3	0	0	1	0	0	0	1	0	0	0	0	4	0	0	1	0	0	0	13	1	0	0	0	0	0	0	0	0	0	0	0	0	0	0
5326.65	1623.56	0	0	0	0	0	0	1	3	4	0	7	0	1	22	0	0	0	0	0	0	2	1	0	0	0	4	0	0	3	1	0	0	3	0	0	0	1	0	0	0	0	0	0	0	0	0	0	0
5327.4	1623.79	0	1	0	0	0	0	0	1	1	0	1	0	0	2	0	0	0	0	0	0	0	0	0	1	0	0	0	0	1	0	0	0	1	1	0	1	2	0	0	0	0	0	0	0	0	1	0	0
5329.3	1624.37	0	0	0	0	0	0	0	0	3	0	2	0	0	1	1	0	0	0	0	0	0	1	0	1	0	0	0	0	1	1	0	0	0	0	0	0	1	0	0	0	0	0	0	0	0	1	0	0
5330.4	1624.71	0	0	1	0	0	0	1	4	5	0	3	0	0	10	0	0	0	0	0	0	0	0	0	0	0	0	0	0	2	0	0	0	3	0	0	0	0	0	0	0	0	0	0	0	0	0	0	0
5331.3	1624.98	0	0	0	0	0	0	1	1	7	0	9	0	0	8	0	0	0	0	0	0	0	0	0	0	0	1	0	0	1	0	0	0	8	0	0	0	0	0	0	0	0	0	0	0	0	0	0	0
5332.3	1625.29	0	0	0	1	0	0	1	2	7	0	2	0	0	7	0	0	0	0	0	0	3	0	0	0	0	2	0	1	0	1	0	0	5	0	0	0	0	0	0	0	0	1	0	0	0	0	0	0
5333.6	1625.68	0	0	0	0	0	0	3	1	6	1	4	0	0	8	0	0	0	0	0	0	3	0	0	0	0	0	0	0	4	1	0	0	4	1	0	0	0	0	0	0	0	1	0	0	0	0	0	0
5334.35	1625.91	0	0	0	0	0	0	1	1	3	0	2	0	0	3	0	0	0	0	0	0	0	2	0	0	0	1	0	1	3	1	0	0	5	0	0	1	1	0	0	1	0	0	0	0	0	0	0	0
5335.5	1626.26	0	0	0	0	0	0	1	0	11	1	5	1	0	10	0	0	1	0	0	0	0	0	0	0	0	3	0	1	1	3	0	0	8	1	0	0	0	0	0	0	0	0	0	0	0	0	0	0
5336.65	1626.61	0	0	0	0	0	0	0	0	2	0	1	0	0	1	1	0	0	0	0	0	0	0	0	1	0	1	0	1	1	3	0	1	3	0	0	0	1	1	0	1	0	0	0	0	0	1	0	0
5337.65	1626.92	0	0	0	0	0	0	2	0	15	0	5	0	0	12	1	0	0	0	0	0	2	0	0	0	0	1	0	0	3	0	0	0	9	0	0	0	1	0	0	0	0	0	0	0	0	0	0	0
5338.4	1627.14	0	0	0	0	0	0	2	0	5	0	2	0	0	1	1	0	1	0	0	0	2	0	0	0	0	0	1	0	1	2	0	0	1	1 ?	0	1	1	0	0	1	0	0	0	0	0	1	0	0
5340.2	1627.69	0	1	0	0	0	0	0	0	9	0	3	0	0	15	0	0	0	0	0	0	0	0	0	0	0	2	0	0	2	0	0	0	10	0	0	0	0	0	0	0	0	0	0	0	0	0	0	0
5341.2	1628	0	0	0	0	0	0	2	2	6	0	3	0	0	10	0	0	0	0	0	0	0	0	0	0	0	5	0	0	2	1	0	0	19	0	0	0	0	0	0	0	0	0	0	0	0	0	0	0
5341.7	1628.15	0	0	0	0	0	0	3	3	25	0	11	0	0	24	0	0	0	0	0	0	2	0	0	0	0	2	0	0	0	0	0	0	14	0	0	0	0	0	0	0	0	0	0	0	0	1	0	0
5342.6	1628.42	0	0	0	0	0	0	4	3	17	0	15	0	0	25	0	0	0	0	0	0	0	0	0	0	0	0	0	0	6	0	0	0	14	0	0	1	0	0	0	0	0	0	8	0	2	0	0	0
5343.85	1628.81	0	0	0	0	0	0	1	0	3	0	1	0	0	3	0	0	0	0	0	0	1	0	0	0	0	3	0	0	2	0	0	0	19	0	0	0	0	0	0	0	0	0	0	0	0	1	0	0
5344.75	1629.08	0	1	0	0	0	0	0	0	4	0	5	0	0	3	1	0	0	0	0	0	2	1	0	0	0	1	0	0	6	0	0	0	8	1	0	2	3	0	0	0	0	0	0	0	0	0	0	0
5345.6	1629.34	0	0	0	0	0	0	0	2	6	0	6	1	0	8	0	0	1	0	0	0	1	0	0	0	0	5	0	0	0	1	0	0	13	0	0	0	0	0	0	0	0	0	0	0	0	0	0	0
5346.75	1629.69	0	0	0	0	0	0	1	3	8	0	1	0	0	3	0	0	1	0	0	0	1	0	0	0	0	0	0	0	6	2	0	0	8	0	0	1	1	0	0	0	1	0	1	0	0	1	0	1
5347.8	1630.01	0	0	0	0	0	0	1	0	10	0	5	0	0	4	1	0	0	0	0	0	0	0	0	1	0	1	0	0	6	1	0	0	5	0	1	2	1	0	0	0	0	1	1	0	0	1	0	0
5349.3	1630.47	0	1	0	0	0	0	0	3	3	0	1	0	0	2	0	0	2	2	0	0	2	0	1	0	0	1	1	0	3	2	0	0	3	1	0	1	3	0	1	0	1	0	0	0	1	2	1	1
5350.15	1630.73	0	0	0	0	0	0	1	4	3	0	5	0	0	5	1	0	0	1	0	1	0	0	0	0	0	3	0	0	5	0	0	0	8	1	0	0	1	0	1	0	0	0	0	0	1	1	1	0
5350.7	1630.89	0	0	0	0	0	0	0	0	3	0	3	0	0	6	1	0	1	0	0	0	1	0	0	0	0	2	0	0	2	1	0	0	19	0	0	1	0	0	0	0	0	0	0	0	0	0	0	0
5351.4	1631.11	0	0	0	0	0	0	0	0	4	0	3	0	0	1	1	0	1	0	0	0	1	0	0	0	0	2	0	0	7	1	0	0	12	1	0	0	0	0	0	0	0	0	0	0	0	0	1	0
5352.1	1631.32	0	0	0	0	0	0	0	0	5	0	1	0	0	1	0	0	1	1	0	0	1	1	0	1	0	1	0	0	3	0	1 ?	1	3	1	0	1	1	1	0	0	0	0	1	0	1	1	1	0
5353.1	1631.62	0	0	0	0	0	0	0	0	1	0	0	0	0	0	0	0	1	0	0	0	0	0	1	0	0	1	0	0	5	1	0	0	3	0	0	0	0	0	0	1	0	0	0	0	0	1	1	0
5353.8	1631.84	0	0	0	0	0	0	0	0	2	0	0	0	0	2	0	0	3	0	0	0	1	0	0	0	0	1	1	0	5	2	0	0	2	0	0	1	0	0	1	0	0	0	0	0	0	0	1	0
5354.9	1632.17	0	0	0	0	0	0	0	0	1	0	1	0	0	0	1	1	0	0	0	0	0	1	0	1	0	2	0	0	4	1	0	0	4	1 ?	0	0	1	0	0	0	0	0	0	0	0	0	1	0
5355.7	1632.42	0	0	0	0	0	0	0	1	7	0	5	0	0	5	0	0	0	0	0	0	1	1	0	0	0	2	1	0	2	1	0	0	4	0	0	0	0	0	0	0	0	1	1	0	0	0	0	0
5356.75	1632.74	0	0	0	0	0	0	1	1	2	0	1	0	0	2	0	0	0	0	0	0	1	0	0	1	0	0	0	0	4	0	0	0	3	1	0	0	0	1	0	0	0	0	0	0	0	2	1	0
5357.6	1633	0	0	0	0	0	1	0	2	6	0	1	0	0	5	1	0	1	0	0	0	1	0	0	0	0	3	0	0	2	0	0	0	1	1	0	0	0	0	0	0	0	0	1	0	0	0	1	0
5358.7	1633.33	0	0	0	0	0	0	0	1	12	0	12	0	0	4	1	0	0	0	0	0	0	0	1	1	0	8	0	0	3	0	0	0	1	0	0	1	0	0	0	1	0	0	1	0	1	0	2	0
5359.9	1633.7	0	0	0	0	0	0	0	3	2	0	5	0	0	4	0	0	0	0	0	0	0	0	0	1	1 ?	2	0	0	2	0	0	0	3	0	0	0	0	0	0	1	0	0	1	0	0	1	4	0
5361	1634.03	0	0	0	0	0	1	0	3	4	0	4	0	0	6	0	0	0	0	0	0	3	0	0	1	0	1	0	0	2	0	0	0	5	0	1 ?	0	0	0	1	1	0	0	1	0	0	0	0	0
5362	1634.34	0	0	0	0	0	0	0	1	5	0	1	0	0	4	0	0	0	0	0	0	0	0	0	1	0	2	0	0	2	0	0	0	6	0	1	0	0	0	1	0	0	0	0	0	0	0	1	0
5363	1634.64	1	0	0	0	0	0	1	0	3	0	2	0	0	5	1	0	1	0	0	0	0	0	1	1	0	8	0	1	1	1	0	1	7	1 ?	1	0	0	0	0	0	0	0	0	0	0	1	1	0
5363.35	1634.75	0	0	0	0	0	0	3	2	10	0	2	0	0	3	2	0	0	0	0	0	3	0	0	1	0	5	0	0	1	1	0	0	7	0	0	0	0	1	0	1	0	0	1	0	0	1	1	0
5365	1635.25	0	0	0	0	0	0	1	4	7	1	7	0	0	7	0	0	0	0	1	0	2	0	0	0	0	12	0	0	0	0	0	0	13	0	0	0	0	0	0	0	0	0	0	0	1	0	0	0
5366	1635.56	0	0	0	0	0	1	0	4	14	0	10	0	0	4	0	0	0	0	0	0	2	0	0	1	0	12	0	0	1	0	0	0	8	0	0	0	0	0	0	1	0	0	0	0	0	0	0	0
5366.5	1635.71	0	0	0	0	0	0	0	0	13	1	12	0	0	18	0	0	0	1	2	0	7	0	0	4	0	3	0	0	2	1	0	0	5	1	0	0	0	1	0	1	0	0	1	0	0	0	2	0
5367.6	1636.04	0	0	0	0	0	0	0	3	5	0	5	0	0	10	1	1	1 ?	1	0	0	2	0	0	2	1 ?	5	0	0	5	1	0	0	4	1	0	0	0	0	1	0	0	0	0	0	0	0	1	0
5368.75	1636.39	0	0	0	0	0	0	0	3	7	1	12	0	0	6	0	0	0	0	7	0	65	0	0	0	0	1	1	0	0	0	0	0	1	0	0	0	0	0	0	0	0	0	0	0	0	0	0	0
5369.35	1636.58	0	0	0	0	0	0	2	2	7	0	7	0	0	5	0	0	0	0	5	0	36	0	0	3	0	6	1	0	1	0	0	0	3	0	0	0	0	1	2	1	0	0	0	0	0	0	1	0
5370	1636.78	0	0	0	0	0	0	1	3	10	1	16	0	0	10	0	0	0	0	0	0	5	0	0	1	0	2	0	1	4	0	0	0	13	1	1	0	0	0	0	0	0	0	0	0	0	1	1	0
5371.75	1637.31	1	1	0	0	0	0	1	8	5	0	4	0	0	3	1	0	0	0	0	0	13	1	0	5	0	9	0	0	3	1	0	0	6	0	0	0	1	1	0	1	0	0	0	0	0	1	4	0
5373.6	1637.87	0	0	0	0	0	0	1	5	7	0	9	0	0	11	0	0	0	0	4	0	18	0	0	1	0	11	0	1	1	3	0	0	7	0	0	0	0	0	2	0	0	0	1	1	0	0	1	0
5374.75	1638.22	0	0	0	0	0	0	0	2	5	0	8	0	0	7	1	1	0	0	1	1	11	0	0	2	1 ?	7	2	1	1	1	0	0	9	0	1 ?	0	0	0	0	1	0	0	1	0	0	0	1	0
5375.9	1638.57	0	1	0	1	0	0	2	4	13	0	25	0	0	25	0	0	0	0	2	0	4	0	0	1	0	2	0	0	5	1	0	0	2	0	0	0	1	0	0	0	0	1	0	0	0	0	2	0
5377	1638.91	0	0	0	0	0	0	0	7	10	0	9	0	0	8	1	0	1	0	1	0	3	0	0	0	0	2	0	0	1	0	0	0	4	0	0	0	0	0	0	0	0	0	0	0	0	0	0	0
5378.8	1639.46	0	0	0	1	0	2	2	2	18	0	23	0	0	21	0	0	0	0	0	0	29	0	0	2	0	14	0	0	0	0	0	0	6	0	0	0	0	0	1	0	0	0	0	0	0	0	0	0
5380.22	1639.89	0	0	0	1	0	0	2	3	16	0	20	0	0	16	0	0	0	0	3	0	29	0	0	1	0	9	0	0	0	0	0	0	9	0	0	0	0	0	0	1	0	0	0	0	0	0	1	0
5381.45	1640.27	0	0	0	0	0	1	2	1	20	0	20	0	0	25	0	0	0	0	4	0	23	1	0	1	0	1	0	0	1	0	0	0	10	1	0	0	0	0	0	1	0	0	0	0	0	1	1	0
5382.95	1640.72	0	0	0	0	0	0	1	3	17	0	36	0	0	14	1	1	0	0	0	0	17	0	0	2	0	13	0	0	1	2	0	0	14	0	0	0	0	0	1	1	0	0	0	0	1	0	0	0
5385	1641.35	0	0	0	0	0	0	2	3	15	0	18	0	0	10	0	0	0	0	4	0	15	0	0	0	0	3	0	0	0	0	0	0	18	0	0	0	0	0	0	0	0	0	0	0	0	0	0	0
5386.25	1641.73	0	0	0	1	0	0	0	5	18	0	19	0	0	20	0	0	0	0	0	0	12	0	0	0	0	9	0	0	0	0	0	0	19	0	0	0	0	0	0	0	0	0	0	0	0	0	0	0
5389.65	1642.77	0	0	0	0	0	1	1	5	45	0	16	0	0	17	0	0	0	0	2	0	10	0	0	0	0	2	0	0	0	0	0	0	25	0	0	0	0	0	0	0	0	0	1	0	1	0	0	0
5391.3	1643.27	0	0	0	0	0	0	1	1	12	1	24	0	0	9	0	0	0	0	4	0	29	1	0	1	0	6	0	0	0	1	0	0	15	0	0	0	0	0	0	0	0	0	0	0	0	0	0	0
5392.2	1643.54	0	0	0	0	0	0	1	4	27	0	21	0	0	15	0	0	0	0	6	0	30	0	0	1	0	14	0	0	0	0	0	0	12	1 ?	0	0	0	0	0	0	0	0	0	0	1	0	0	0
5393.65	1643.98	0	0	0	0	0	1	3	3	15	1	31	0	0	18	0	0	0	0	4	0	37	0	0	1	0	9	0	0	1	0	0	0	7	0	0	0	0	0	0	0	0	0	0	0	0	0	0	0
5395.7	1644.61	0	0	0	0	0	1	5	3	23	1	30	0	0	25	0	0	1	0	0	0	5	0	0	0	0	9	0	0	0	1	0	0	23	0	0	0	0	0	0	0	0	0	0	0	0	0	0	0
5397.3	1645.1	0	0	0	0	0	1	2	2	19	0	26	0	0	25	0	0	0	0	6	0	26	0	0	1	0	11	0	0	0	0	0	0	13	0	0	0	0	0	0	1	0	0	0	0	0	0	0	0
5401.05	1646.24	0	0	0	0	0	2	1	4	18	1	35	0	0	11	0	0	0	0	2	0	33	0	0	1	0	10	0	0	1	0	0	0	12	0	0	0	0	0	0	2	0	0	0	1	0	0	0	0
5404.4	1647.26	0	0	0	0	0	4	1	2	16	0	12	0	0	20	0	0	0	0	1	0	18	0	0	0	0	8	20	0	0	0	0	0	6	0	0	0	0	0	0	0	0	0	0	0	0	0	0	0
5406.25	1647.83	0	0	0	0	0	4	0	1	18	1	17	0	0	24	0	0	0	0	0	0	46	1	0	0	0	14	0	0	0	0	0	0	2	0	0	0	0	0	0	1	0	0	1	0	0	0	0	0
5410.45	1649.11	0	0	0	0	0	3	0	1	6	0	13	0	0	6	0	0	0	0	2	0	10	0	0	2	0	0	63	0	1	0	0	0	2	0	0	0	0	0	1	0	0	0	0	0	1	0	0	0
5413.4	1650	0	0	0	0	0	3	0	4	9	1	8	0	0	13	0	0	0	0	3	0	60	0	0	0	0	3	1	0	0	0	0	0	2	0	0	0	0	0	0	0	0	0	1	0	0	0	0	0
5416.95	1651.09	0	0	0	0	0	4	0	2	4	1	8	0	0	17	0	0	0	0	2	0	58	1	0	1	0	10	0	0	0	0	0	0	3	0	0	0	0	0	0	0	0	0	1	0	0	0	0	0
5420.99	1652.32	0	0	0	0	0	3	2	1	15	0	20	0	0	25	0	0	0	0	0	0	29	0	0	0	0	5	0	0	0	0	0	0	6	0	0	0	0	0	0	0	0	0	0	0	0	0	0	0
5421.2	1652.38	0	0	0	0	0	4	0	0	8	0	16	0	0	8	0	0	0	0	2	0	59	0	0	2	0	10	0	0	0	0	0	0	1	0	0	0	0	0	0	0	0	0	0	0	0	0	0	0
5429.6	1654.94	0	0	0	0	0	7	0	0	3	1	15	0	0	19	0	0	0	0	3	0	60	0	0	1	0	7	0	0	0	0	0	0	3	0	0	0	0	0	0	0	0	0	0	0	0	0	0	0
5435.95	1656.88	0	0	0	0	0	4	0	3	7	1	5	0	0	7	0	0	0	0	6	0	78	0	0	0	0	4	0	0	0	0	0	0	0	0	0	0	0	0	0	0	0	0	0	0	0	0	0	0
5439.35	1657.91	0	0	0	0	0	1	0	1	8	1	11	0	0	16	0	0	0	0	5	0	71	0	0	0	0	0	0	0	0	0	0	0	1	0	0	0	0	0	0	0	0	0	0	0	0	0	0	0
5446.7	1660.15	0	0	0	0	0	2	0	1	2	0	11	0	0	12	0	0	0	0	3	0	64	0	0	0	0	7	0	0	0	0	0	0	3	0	0	0	0	0	0	0	0	0	0	0	0	0	0	0
5451.1	1661.5	0	0	0	0	0	1	0	0	3	0	8	0	0	4	0	0	0	0	3	0	20	0	0	0	0	6	1	0	0	0	0	0	2	0	0	0	0	0	0	0	0	0	0	0	0	0	0	0
5452.8	1662.01	0	0	0	0	0	2	1	1	27	0	7	0	0	8	0	0	0	0	6	0	6	0	0	0	0	10	1	0	0	0	0	0	1	0	0	0	0	0	0	0	0	0	0	0	0	0	0	0
5454.3	1662.47	0	0	0	0	0	5	1	0	23	2	28	0	0	25	0	0	0	0	0	0	8	0	0	0	0	3	0	0	0	0	0	0	3	0	0	0	0	0	0	0	0	0	0	0	0	0	0	0
5454.5	1662.53	0	0	0	0	0	0	0	0	10	0	23	0	0	14	0	0	0	0	2	0	6	0	0	0	0	4	0	0	0	0	0	0	3	0	0	0	0	0	0	0	0	0	0	0	0	0	0	2
5456.65	1663.19	0	0	0	0	0	7	2	4	20	0	33	0	0	25	0	0	0	0	0	0	1	0	0	1	0	5	0	0	0	0	0	0	1	0	0	0	0	0	0	0	0	0	0	0	0	0	0	0
5458	1663.6	0	0	0	0	0	1	0	4	10	0	16	0	0	12	0	0	0	0	0	0	1	0	0	1	0	1	0	0	0	0	0	0	1	0	0	0	0	0	0	0	0	0	0	0	0	0	0	0
5463.3	1665.21	0	0	0	0	0	1	3	1	16	0	41	0	0	19	0	0	0	0	0	0	0	0	0	0	0	4	0	0	0	0	0	0	0	0	0	0	0	0	0	0	0	0	0	0	0	0	0	3
5471.75	1667.79	0	0	0	0	0	2	1	2	17	0	22	0	0	20	0	0	0	0	0	0	3	0	0	0	0	9	0	0	0	0	0	0	5	0	0	0	0	0	0	0	0	0	0	0	0	0	0	0
5476.3	1669.18	0	0	0	0	0	4	0	3	17	0	27	0	0	26	0	0	0	0	0	0	3	0	0	0	0	4	0	0	0	0	0	1	0	0	0	0	0	0	0	0	0	0	0	0	0	0	0	0
5482.15	1670.96	0	0	0	0	0	3	0	6	8	0	22	0	0	18	0	0	0	0	0	0	1	0	0	0	0	4	0	0	0	0	0	0	2	0	0	0	0	0	0	0	0	0	0	0	0	0	0	0
5486.45	1672.27	0	0	0	0	0	1	1	2	35	0	29	0	1	23	0	0	0	0	0	0	0	0	0	0	0	5	0	1 ?	0	0	0	0	2	0	0	0	0	0	0	0	0	0	0	0	0	0	0	0
Categories:
AC - ACritacrh
AL - ALgae (miscellaneous)
ALFW - ALgae Fresh/brackish-Water
ALPR - ALgae PRasinophyte
DC - Dinoflagellate Cyst (DinoCyst)
FT - Foraminiferal Test linings
FU - FUngal spores & hyphae
MP - Miscellaneous Palynomorphs
SP - Spores & Pollen
LY - LYcopodium spores added & associated concentration calculation data
OM- Organic Matter (100 kerogen point count)
AB - ABsolute abudance, i.e. concentration
AR - AReoligeracean dinocyst concentration
DG - DinoGymnioidean dinocyst concentration
GC - Gonyaulacoid dinocyst Concentration
PC - Peridinioid dinocyst Concentration
PG - Palynomorph Group (% from initial 100 specimen count)
SG - Sporomorph Group
[truncated: 138 more columns]

## Sheet: Austin AU2 outcrop
Depth (meters from top Buda)	Micrhystridium spp.	Veryhachium spp.	Paralecaniella indentata	Crassosphaera spp.	Cymatiosphaera spp.	Leiopsophosphaera spp.	Leiosphaeridia spp.	Pterospermella aureolata	Pterospermella australiensis	Pterospermella spp.	Pterosphaeridia spp.	Tasmanites spp.	TOTAL ALGAL	Achomosphaera ramulifera	Adnatosphaeridium? chonetum	Apteodinium deflandrei	Ascodinium cf. ovatum sensu Dodsworth 2016	Atopodinium haromense	Bosedinia cf. sp.1 & sp.3 Prauss 2012	Canningia reticulata s. l.	Cassiculosphaeridia reticulata	Chichaouadinium? cf. vestitum	Chlamydophorella discreta	Chlamydophorella spp.	Circulodinium distinctum / Tenua hystrix	Circulodinium longispinatum	Circulodinium spp.	Cleistosphaeridium / Downiesphaeridium spp.	Codoniella campanulata	Cometodinium spp.	Corculodinium inaffectum sensu H.&T. 2003	Coronifera oceanica	Cribroperidinium spp.	Cyclonephelium compactum	Cyclonephelium membraniphorum	Cyclonephelium vannophorum	Dapsilidinium laminaspinosum	Dapsilidinium? pumilum	Dapsilidinium spp.	Dinogymnium acuminatum	Dinogymnium albertii	Dinogymnium cretaceum	Dinopterygium cladoides	Downiesphaeridium armatum	Epelidosphaeridia? cf. spinosa	Eurydinium glomeratum	Exochosphaeridium phragmites	Eyrea nebulosa	Florentinia clavigera
	AC	AC	AL	ALPR	ALPR	ALPR	ALPR	ALPR	ALPR	ALPR	ALPR	ALPR		DC	DC	DC	DC	DC	DC	DC	DC	DC	DC	DC	DC	DC	DC	DC	DC	DC	DC	DC	DC	DC	DC	DC	DC	DC	DC	DC	DC	DC	DC	DC	DC	DC	DC	DC?	DC
19.7		1		1	12		11	1	4	7		10	46				4		3	16		2			4		6				4					22				1 ?	1	1			1		1	1
19.5	1	1			10		12	2	4	2	3	4	37			1	2		7	1		2			12		2	1			6					8		2	1	1	2	1					1	1
18.4				1	1		6	1	1	1	1	4	16			1	4		9	5	1	3	1		15		1	1			3	1				9		1		1	5	1	1			1	1	3
16.6				1	1		7	1	1	1	1	1	14	1		1	3		7	5		3			5		1				6				1	7					2					2		1
14.2	1		1	1	3		6		1	3		4	19				5		17	1		5			2			2			4				1	1				1	4	1			4		1	1
13.7	1			1	3		6		1	3	1	1	16	1		1	7	1	20	1		4			1		1	3			5	3	1	1	2	1		1		1	2	1		1	4	1	1	1	1
13.3				4	2	1	2	1	1	4	1	3	19		1 ?		23	1	54			1			1	5		1	1 ?		1	1					1						1		1			1
12.9	1			3	2		5	2	1	8	1	6	28				23		66						1	2					2														1		1
12.4				2	1	1		1	2	1	1	2	11	1			23		64	1		1		1	1	2				1	1														2		2
10.1	9	2		1			1			1	1	2	6			1	16		40	2		1			1	1					4	1				2							1				1	3
Categories:
AC - ACritacrh
AL - ALgae (miscellaneous)
ALFW - ALgae Fresh/brackish-Water
ALPR - ALgae PRasinophyte
DC - Dinoflagellate Cyst (DinoCyst)
FT - Foraminiferal Test linings
FU - FUngal spores & hyphae
MP - Miscellaneous Palynomorphs
SP - Spores & Pollen
LY - LYcopodium spores added & associated concentration calculation data
OM- Organic Matter (100 kerogen point count)
AB - ABsolute abudance, i.e. concentration
AR - AReoligeracean dinocyst concentration
DG - DinoGymnioidean dinocyst concentration
GC - Gonyaulacoid dinocyst Concentration
PC - Peridinioid dinocyst Concentration
PG - Palynomorph Group (% from initial 100 specimen count)
SG - Sporomorph Group
[truncated: 137 more columns]

## Sheet: USGS Portland-1 palynology
depth (m)	Leiofusa spp.	Micrhystridium spp.	Scuticabolis lapidaris	Veryhachium spp.	Total Acritarchs	Cyclopsiella spp.	Palambages spp.	Paralecaniella indentata	Botryococcus spp.	Ovoidites parvus	Pediastrum spp.	Scenedesmus spp.	Schizosporis spp.	Tetraporina spp.	Algal sphaeromorphs	Crassosphaera hexagonalis	Crassosphaera spp.	Cymatiosphaera radiata	Cymatiosphaera spp.	Leiopsophosphaera spp.	Leiosphaeridia spp.	Leiosphaeridia? spp. (pilae)	Leiosphaeridia? spp. (scabrate)	Pterospermella aureolata	Pterospermella australiensis	Pterospermella spp.	Pterosphaeridia spp.	Tasmanites spp.	Total Algae	Achomosphaera ramulifera	Achomosphaera sagena	Adnatosphaeridium tutulosum	Achomosphaera spp.	Adnatosphaeridium? chonetum	Aldorfia aff. aldorfensis	Alterbidinium spp.	Apteodinium deflandrei	Apteodinium grande	Apteodinium maculatum	Apteodinium spp.	Ascodinium cf. ovatum sensu Dodsworth 2016	Apteodinium suibinense	Atopodinium haromense	Batioladinium jaegeri	Bosedinia cf. sp.1 & 3 Prauss 2012	Bosedinia spp.	Bosedinia? spp. (grana)	Bosedinia cf. sp.1 & 3 + A. cf. ovatum	Callaiosphaeridium asymmetricum
	AC	AC	AC	AC		AL	AL	AL	ALFW	ALFW	ALFW	ALFW	ALFW	ALFW	ALPR	ALPR	ALPR	ALPR	ALPR	ALPR	ALPR	ALPR	ALPR	ALPR	ALPR	ALPR	ALPR	ALPR		DC	DC	DC	DC	DC	DC	DC	DC	DC	DC	DC	DC	DC	DC	DC	DC	DC	DC	DC	DC
145.24				1	1			4												1	3		1				1		10	1							1								4	1		4
145.92		1	1	1	3			2													1		1					1	5	3							1								3			3
146.18					0			2													2						1		5	1	1	1		2			1						1		3	1		3
146.53			1		1			1											1		4		1				1	1	9	1	1	1		2		1							1		1			1
146.94			5	1	6			1							1						1						1	1	5	2	1	1		2			1				1		1		2	1		3	1
147.22			8	1	9			4												1	1		1				1		8	1				3			2						1		4	1		4
147.9		1		1	2																1							1	2	1	1	2		2			1						1		1	1		1	1
149.45				1	1		1	1	1											1	6		2	1		4	1	4	22	1	1			1			1		1				1		2			2
150.83					0				1										1	3	15	1	39		1	3	1	5	70	1						2									4	1		4
153.95				1	1		1	1									1			3	20		1		1	9		10	47							3									13			13
155.45					0			1	1							4	4		1		18				2	9	1	6	47							1									26			26
158.57				1	1				1							1	2			1	10				1	10		2	28												2				51			53
160.07				1	1			1								1	1		1	1	14				1	8		6	34												1				38	1		39
163.03					0				2							1	1		1		4			1	1	4	1	1	17												1				19	3	1	21
169.19				1	1		1	1	1							1		1	1	2	14				1	11		8	42												1				4	1		5
170.71					0			1	1								1				5					8	1	5	22					1 ?			1								2			2	1
172.26					0			1											1	1	6		1			2		1	13					1									1		2	1		2
173.76		1			1			1	1								1		1		6			1	1	4		5	21																15			15
175.29				1	1																6					5		4	15					1									1		7			7
178.1				1	1			1											1		4					4		2	12														1		3	1		3	1
178.33				1	1			1										2	1						1	1			6						2	1	1		1				1	1				0
179.86					0																3					1		3	7														1		3	1		3
180.04				1	1			1													5			1		5		2	14	1															4			4
181.48		1		1	2			2	1				1						1		8		1	1	1	4	1	8	29	1													1		4			4	1
182.98				5	5	1		3		1									2		3			1		4		2	17	2													1		2			2
184.53				1	1		1	1		1			1						1		1			1		3		2	12								1		1						5			5
185.98					0														1		7			1		2		3	14	1							1		1						7	1	1	8
186.75			1	1	2			2	1												2					1		1	7	1			2										1		1			1
189.17		1		1	2			2					1								1					1		1	6		1						1								8			8
190.58				1	1			2	2		1										5			1				1	12		1								1						1		2	3
192.07		1			1				1												6					7		11	25						1										6			6
192.91				1	1			5	1										1	1	1			1	1	3		1	15																16	1		16
194.01					0			1	1										1		4					8		6	21																2			2
195.2					0			1	1												3			1		4		2	12						1										1			1
196.49				1	1			1	1										1							2			5																14			14
198.27				1	1			1	1												1					1		1	5																2			2
201.27					0																1					7		2	10									1		1					1			1
204.39				1	1			1										2								2		1	6						1			1		2				1				0
204.93	1			1	2	1	1			1								2										1	6						1					1		4	1					0
205.16				1	1				1	1	1		2															1	6						2					1		1						0
207.31	1				1				3	1	1	1	1												1				8									1		1								0
208.97					0				5	1		1	1								1								9											1					2			2
209.59					0				2	1			1	1 ?														1	5						1					1								0
211.53					0				2	1			1						1										5																			0
211.61					0				2	1			1																4																	2		0
213.36
Categories:
AC - ACritacrh
AL - ALgae (miscellaneous)
ALFW - ALgae Fresh/brackish-Water
ALPR - ALgae PRasinophyte
DC - Dinoflagellate Cyst (DinoCyst)
FT - Foraminiferal Test linings
FU - FUngal spores & hyphae
MP - Miscellaneous Palynomorphs
SP - Spores & Pollen
LY - LYcopodium spores added & associated concentration calculation data
OM- Organic Matter (100 kerogen point count)
AB - ABsolute abudance, i.e. concentration
AR - AReoligeracean dinocyst concentration
DG - DinoGymnioidean dinocyst concentration
GC - Gonyaulacoid dinocyst Concentration
PC - Peridinioid dinocyst Concentration
PG - Palynomorph Group (% from initial 100 specimen count)
SG - Sporomorph Group
[truncated: 289 more columns]

## Sheet: ODP Site 1260 Palynolgy
SITE	HOLE	CORE	CORE_TYPE	SECTION	CC	TOP_DEPTH	BOTTOM_DEPTH	VOLUME	MBSF_TOP	MCD_TOP	Micrhystridium spp.	Sphaeromorph acritarch clusters	Total acritarchs	Paralecaniella indentata	Lecaniella spp.	Pediastrum spp.	Crassosphaera spp.	Cymatiosphaera spp.	Leiosphaeridia spp.	Pterospermella aureolata	Pterospermella australiensis	Pterospermella spp.	Tasmanites spp.	Total Algae	Adnatosphaeridium? chonetum	Alisogymnium euclaense	Ascodinium spp.	Bosedinia cf. sp.1 Prauss 2012	Bosedinia cf. sp.1 (clusters) Prauss 2012	Bosedinia cf. sp.2 Prauss 2012	Bosedinia cf. sp.3 Prauss 2012	Chlamydophorella discreta	Chlamydophorella spp.	Circulodinium distinctum	Cleistosphaeridium / Downiesphaeridium spp.	Cometodinium spp.	Corculodinium inaffectum sensu H.&T. 2003	Corrudinium spp.	Dapsilidinium laminaspinosum	Dapsilidinium spp.	Dinogymnium acuminatum	Dinogymnium albertii	Dinopterygium cladoides	Exochosphaeridium phragmites	Florentinia clavigera	Florentinia resex	Florentinia spp.	Fromea laevigata	Ginginodinium evittii
											AC	AC	calc	AL	ALFW	ALFW	ALPR	ALPR	ALPR	ALPR	ALPR	ALPR	ALPR	calc	DC	DC	DC	DC	DC	DC	DC	DC	DC	DC	DC	DC	DC	DC	DC	DC	DC	DC	DC	DC	DC	DC	DC	DC	DC
1260	A	46	R	4	no	67	68	7	418.95	422.02			0					2	13			4	1	20				54	1	4		7	1			1	1
1260	A	46	R	5	no	36	37	7	420	423.07			0					2	4	1	1	2	1	11				11	1			8	9		2						1	2
1260	B	35	R	4	no	22	23	7	419.99	424.53		1	1					2	2			1		5				4	1			1					3	3 ?				1				1
1260	B	35	R	4	no	86	87	7	420.63	425.17			0			1		1	1			1	1	5				26		11		4						1 ?
1260	B	35	R	4	no	117	118	7	420.94	425.48			0		1 ?				1					1			1	42	4	1	1		2											1
1260	B	35	R	5	no	52	53	7	421.79	426.33			0					3	13		1	5	3	25				65	2		2	1												1		1	1
1260	B	35	R	5	no	106	107	7	422.33	426.87			0					2	5		2	12	3	24			7	23			4		1			1								1		1
1260	B	35	R	6	no	52.5	53.5	7	423.295	427.835			0					3	14		3	19	3	42		1	2	22	2		1				1
1260	A	47	R	1	no	98	99	7	424.88	428.47			0					3	12	1	1	10	2	29			2	21							5									1	1	2
1260	A	47	R	3	no	62.5	63.5	7	427.525	431.115			0					2	42	1	1	16	6	68				16	1		2				3									2		1	1		3
1260	A	47	R	4	no	76	77	7	429.16	432.75		1	1					3	27	1	1	17	9	58			2	11						1	8									2			2
1260	A	47	R	7	no	27	28	7	432.4	435.99			0					7	25		1	14	8	55			2	23							2										2	1
1260	A	48	R	1	no	47	48	7	433.97	437.56			0					1	37	2	1	19	6	66	2			3							7				4	5						2
1260	A	48	R	2	no	70	71	7	435.7	439.29			0					1	19	2		8	2	32			1	6				3				1								1	1	2
1260	A	48	R	4	no	50	51	7	438.38	441.97		1	1					1	13	1	1	6	1	23		4		5							2							2			1	1	1	2
1260	A	48	R	5	no	70	71	7	439.88	443.47	1	1	2					1	8	1		4	2	16				63	1	5	1				1					2
1260	A	48	R	6	no	92	93	7	441.6	445.19			0					1	12	1		4	2	20				28		1	1				1					1			1	1		2
1260	A	49	R	1	no	56	57	7	443.66	446.53	1		1					1	3		1	3	3	11		1	2	5									1							1		1
1260	A	49	R	3	no	56	57	7	446.51	449.38			0					1	15	1	1	7	3	28				68			1				1					2						1
1260	A	49	R	4	no	50	51	7	447.95	450.82			0					1	29		1	13	7	51				82														1	1
1260	A	49	R	5	no	15	16	7	449.1	451.97			0						6			2	2	10				2																	1
1260	A	49	R	6	no	35	36	7	450.46	453.33			0					1	20		1	8	3	33				2
1260	A	50	R	1	no	70	71	7	453.4	456.38		1	1						7			3	1	11				41																1
1260	A	50	R	3	no	60	61	7	456.3	459.28			0	1				2	11	1	1	5	2	23				2
1260	A	50	R	5	no	102	103	7	459.72	462.7			0					1	5		3	2	4	15				20								50				1					2	2	1
1260	A	51	R	1	no	85	86	7	462.85	466.5		1	1	1			1	3	18		5	4	5	37				29							2	2								1		1
Categories:
AC - ACritacrh
AL - ALgae (miscellaneous)
ALFW - ALgae Fresh/brackish-Water
ALPR - ALgae PRasinophyte
DC - Dinoflagellate Cyst (DinoCyst)
FT - Foraminiferal Test linings
FU - FUngal spores & hyphae
MP - Miscellaneous Palynomorphs
SP - Spores & Pollen
LY - LYcopodium spores added & associated concentration calculation data
OM- Organic Matter (100 kerogen point count)
AB - ABsolute abudance, i.e. concentration
AR - AReoligeracean dinocyst concentration
DG - DinoGymnioidean dinocyst concentration
GC - Gonyaulacoid dinocyst Concentration
PC - Peridinioid dinocyst Concentration
PG - Palynomorph Group (% from initial 100 specimen count)
SG - Sporomorph Group
[truncated: 187 more columns]

## Sheet: ODP Site 1261A Palynology
Depth (m.b.s.f)	Depth (m.c.d)	Schizosporis reticulatus	Tetraedron spp.	Cymatiosphaera spp.	Leiosphaeridia spp.	Pterospermella aureolata	Pterospermella australiensis	Pterospermella spp.	Pterosphaeridia spp.	Tasmanites spp.	Total Algae	Circulodinium distinctum / Tenua hystrix	Cleistosphaeridium / Downiesphaeridium spp.	Alisogymnium euclaense	Corrudinium spp.	Eyrea nebulosa	Fromea amphora	Odontochitina operculata	Dinogymnium acuminatum	Dinogymnium albertii	Chlamydophorella discreta	Dapsilidinium spp.	Exochosphaeridium phragmites	Florentinia clavigera	Florentinia radiculata	Florentinia resex	Florentinia spp.	Heterosphaeridium? spp.	Leptodinium spp.	Nematosphaeropsis sp. A	Pterodinium cingulatum cingulatum	Sepispinula? ambigua	Sepispinula pertusa	Spiniferites ramosus Group	Spiniferites twistringiensis	Spiniferites sp. A Leereveld 1997	Ascodinium spp.	Bosedinia cf. sp.1 Prauss 2012	Bosedinia cf. sp.1 (clusters) Prauss 2012	Bosedinia cf. sp.2 Prauss 2012	Bosedinia cf. sp.3 Prauss 2012	Corculodinium inaffectum sensu H.&T. 2003	Palaeohystrichophora cheit	Palaeohystrichophora infusorioides	Sentusidinium spp.	Subtilisphaera pontis-mariae	Subtilisphaera spp.	Trithyrodinium spp.	Total Dinocysts
		ALFW	ALFW	ALPR	ALPR	ALPR	ALPR	ALPR	ALPR	ALPR		AR	AR	DC	DC	DC?	DC	DC	DG	DG	GC	GC	GC	GC	GC	GC	GC	GC	DC	GC	GC	GC	GC	GC	GC	GC	DC	PC	PC	PC	PC	PC	PC	PC	PC	PC	PC	PC	calc
624.67	622.57				2			2			4					1				2	4				1	1							6		1	1		15		2		2			11	6	47		100
629.22	627.12			1	4			1			6		1	1	3						4					1		1		1			7		1	2		15		4					16		47		104
629.635	627.535				1		1	2		1	5								2	2						2				4			1			2	1	10	2	4			2		3		3	3	41
633.105	630.165			1	4			1		2	8		2							2	5					1			2		1	1	2		1	2		16							5		2	2	44
636.6	633.66	1		1	3					1	6		2											1	2	5	1					3	36		1	4		39						2	1		3		100
639.38	636.44		1	1	8		1	7		1	19					1				5					1	5	1			9			11	1	4	6		43						1		1	13		102
640.9	637.57			2	34	2	7	16	2	3	66									1		1				1							1	3	1	2	1	27				4		2	1	1	55		101
640.915	637.585			2	19	1		12		1	35						1							2	1				1	2	2		11	4	4			53						1					82
646.88	643.55			1	4			4		2	11	1	1					2	2	3			1	1		2				2	1			2	3			38	1					1	2		20		83
651.785	647.995			1	23		2	15	1	2	44										1					1				1			1	1		1	2	87			2	1		3	1		2		104
Categories:
AC - ACritacrh
AL - ALgae (miscellaneous)
ALFW - ALgae Fresh/brackish-Water
ALPR - ALgae PRasinophyte
DC - Dinoflagellate Cyst (DinoCyst)
FT - Foraminiferal Test linings
FU - FUngal spores & hyphae
MP - Miscellaneous Palynomorphs
SP - Spores & Pollen
LY - LYcopodium spores added & associated concentration calculation data
OM- Organic Matter (100 kerogen point count)
AB - ABsolute abudance, i.e. concentration
AR - AReoligeracean dinocyst concentration
DG - DinoGymnioidean dinocyst concentration
GC - Gonyaulacoid dinocyst Concentration
PC - Peridinioid dinocyst Concentration
PG - Palynomorph Group (% from initial 100 specimen count)
SG - Sporomorph Group
[truncated: 123 more columns]

## Sheet: ODP Site 1138 Palynology
Top Depth (m)	Base Depth (m)	Micrhystridium spp.	Veryhachium spp.	Total Acritarchs	Nummus monoculatus	Palambages spp.	Paralecaniella indentata	Botryococcus spp.	Algal sphaeromorphs	Cymatiosphaera radiata	Cymatiosphaera spp.	Leiosphaeridia spp.	Pterospermella australiensis	Pterospermella spp.	Pterosphaeridia spp.	Tasmanites spp.	Total Algae	Acanthaulax wilsonii	Achomosphaera ramulifera	Achomosphaera sagena	Adnatosphaeridium tutulosum	Adnatosphaeridium? chonetum	Apteodinium deflandrei	Apteodinium spp.	?Ascodinium parvum	Batiacasphaera euteiches	Callaiosphaeridium asymmetricum	Chichaouadinium vestitum s.s.	Chlamydophorella discreta	Chlamydophorella spp.	Circulodinium distinctum	Circulodinium spp.	Cleistosphaeridium / Downiesphaeridium spp.	Cometodinium spp.	Coronifera striolata	Cribroperidinium muderongense	Cribroperidinium spp.	Cyclonephelium compactum	Cyclonephelium membraniphorum	Dapsilidinium laminaspinosum	Dapsilidinium spp.	Diconodinium multispinum	Dinopterygium cladoides	Diplofusa gearlensis	Disphaeria macropyla	Downiesphaeridium armatum	Elytrocysta circulata	Exochosphaeridium bifidum	Exochosphaeridium phragmites
		AC	AC		AL	AL	AL	ALFW	ALPR	ALPR	ALPR	ALPR	ALPR	ALPR	ALPR	ALPR		DC	DC	DC	DC	DC	DC	DC	DC	DC	DC	DC	DC	DC	DC	DC	DC	DC	DC	DC	DC	DC	DC	DC	DC	DC	DC	DC?	DC	DC	DC	DC	DC
655.08	655.1			0	2		1					1			1		5	1			1				3		1		6	1	4		1	1		2	2	14	1				1		1			1	1
655.5	655.52	1		1	1	1			1	1	1			1		1	7				2				3		1		5	1	9		2			1	1	8								1			3
656.07	656.09			0			1		1			2		1			5		1	1	1				2	1	1		6	1	15			1	1		1	18	2	2			1	1			1		1
656.47	656.49		1	1							1						1		1		1	1			2	1	1	1	2	1	13					1	2	12	16		1		1				1		5
657.05	657.07		1	1			1	1	1	1	1	1		1			7		2		1		1		2	1	2		10		8	1	1			1	1	2	1		1		1	1	1	2			1
657.58	657.6		1	1			1				1	1			1		4		4		1				3	1	1		2	1	5		1			2	1	4	1							4	1		1
658.16	658.18		1	1						1			1				2		1		1		1	1		1	1		4	1	38			1			1	4	1	1		1	1	1		1	1		3
659.78	659.8			0			1 ?							1			1														2							1					1
Categories:
AC - ACritacrh
AL - ALgae (miscellaneous)
ALFW - ALgae Fresh/brackish-Water
ALPR - ALgae PRasinophyte
DC - Dinoflagellate Cyst (DinoCyst)
FT - Foraminiferal Test linings
FU - FUngal spores & hyphae
MP - Miscellaneous Palynomorphs
SP - Spores & Pollen
LY - LYcopodium spores added & associated concentration calculation data
OM- Organic Matter (100 kerogen point count)
AB - ABsolute abudance, i.e. concentration
AR - AReoligeracean dinocyst concentration
DG - DinoGymnioidean dinocyst concentration
GC - Gonyaulacoid dinocyst Concentration
PC - Peridinioid dinocyst Concentration
PG - Palynomorph Group (% from initial 100 specimen count)
SG - Sporomorph Group
[truncated: 131 more columns]

## Sheet: Compiled dataset_PCA
Core/Location	Depth	Al2O3	Al	SiO2	TiO2	Fe2O3	MnO	MgO	CaO	Na2O	K2O	P2O5	Ba	Cr	Sc	Sr	Zn	Zr	Be	V	Co	Ni	Cu	Ga	Rb	Y	Nb	Mo	Sn	Cs	La	Ce	Pr	Nd	Sm	Eu	Gd	Tb	Dy	Ho	Er	Tm	Yb	Lu	Hf	Ta	W	Tl	Pb
Innes-1	12.24	3.19034	1.68897	7.70955	0.128001	2.14231	0.0314518	1.01372	43.1382	0.181726	0.688369	0.165305	679.266	39.9988	5.61709	861.939	31.6028	29.833	0.389013	37.3113	5.09941	25.0853	18.3739	2.11342	14.482	12.7437	2.07638	0.406199	0.554154	0.960892	16.6127	22.8114	3.79247	14.1328	2.68642	0.646245	2.57889	0.38532	2.09637	0.436015	1.13284	0.166434	1.04488	0.163931	0.789203	0.144258	0.412138	0.200472	3.28424
Innes-1	13.58	0.752517	0.398382	3.02839	0.0366493	0.384457	0.0225118	0.66888	48.434	0.296883	0.260087	0.0865376	27.1158	21.5123	0.794588	700.449	15.5978	7.60452	0.287177	10.3481	2.34446	20.257	3.90457	0.969997	6.03717	2.92024	0.778402	0.0298676	0.482085	0.446855	2.17096	3.14219	0.52743	2.01102	0.337946	0.0996547	0.383253	0.0598079	0.3355	0.0879939	0.209856	0.0340889	0.185864	0.0292734	0.260123	0.0591058	0.399196	0.0521459	6.1995
Innes-1	17.45	10.4174	5.51497	28.303	0.516788	3.07322	0.0144334	1.89827	23.9288	0.211106	2.62049	0.281753	92.673	121.889	9.56745	904.367	291.898	101.678	0.881899	143.389	14.4923	56.0028	22.5142	13.7736	58.9195	21.862	6.49956	0.966715	0.987543	3.69088	30.3514	44.8127	6.66672	24.4764	4.63743	1.00158	4.66156	0.633376	3.59005	0.743499	1.87413	0.273714	1.69011	0.262485	2.75043	0.460825	0.948713	0.529571	3.76883
Innes-1	18.5	0.667977	0.353627	2.98037	0.0338218	0.234963	0.0212192	0.556957	49.714	0.135293	0.246461	0.0505601	30.8575	9.52979	0.567878	728.186	19.487	6.5858	0.298379	10.2779	1.72121	12.4674	3.02302	0.983105	5.63056	2.44644	0.800615	0.03385	0.44605	0.441766	1.73837	2.33314	0.383768	1.47495	0.3097	0.0734827	0.271302	0.0451011	0.290298	0.0652539	0.165165	0.0250653	0.152158	0.022443	0.200246	0.0420753	0.275754	0.0463519	1.06167
Innes-1	22.5	0.836548	0.442869	3.74673	0.0369756	0.384051	0.0196035	0.922311	48.2191	0.179671	0.260523	0.0650362	42.7229	9.60785	0.789851	749.564	21.5844	7.42923	0.336058	13.0354	1.87878	11.0922	3.73718	1.05974	6.48686	2.93017	0.689552	0.150334	0.528832	0.438712	2.21402	2.96818	0.516379	1.83399	0.338955	0.0835489	0.358039	0.0617688	0.324451	0.0761296	0.197226	0.0330862	0.183938	0.0292734	0.228712	0.0420753	0.207064	0.0475107	1.08575
Innes-1	24.24	0.676319	0.358043	3.0324	0.0307767	0.311082	0.019065	0.646003	49.4013	0.189738	0.205911	0.0547113	37.4717	9.22507	0.901003	776.644	54.6838	5.97912	0.290232	12.4638	1.6349	10.9516	4.41072	0.808667	4.8023	2.9252	0.593942	0.264826	0.485006	0.423444	2.14893	2.74116	0.448064	1.76735	0.331893	0.0775092	0.361064	0.0588275	0.356594	0.078107	0.195283	0.0330862	0.196458	0.0243945	0.197301	0.0270484	0.209055	0.0266524	0.660894
Innes-1	25.35	1.65112	0.874103	6.50199	0.0816726	0.597469	0.0192804	0.703	46.685	0.170015	0.483003	0.0772771	41.5427	15.2789	1.46624	804.052	28.7724	17.4263	0.432803	29.8209	3.16242	14.8866	6.36202	1.85025	11.848	4.92765	1.30571	0.513723	0.46845	0.780725	4.55222	6.6564	0.983532	3.65505	0.658743	0.165084	0.750368	0.105889	0.639861	0.12853	0.363362	0.0511333	0.34669	0.0556195	0.497669	0.104186	0.323538	0.0880687	1.19173
Innes-1	25.98	1.52701	0.808399	4.38302	0.0355618	0.376632	0.0199267	0.544039	48.8346	0.270688	0.169721	0.0588626	23.5479	12.0713	2.50064	790.567	19.9248	11.4734	0.305508	26.171	1.53855	11.6944	4.72768	1.06982	3.63653	10.8565	1.2468	0.598348	0.549284	0.280939	13.6286	20.0812	2.31065	8.10277	1.39415	0.289904	1.40694	0.212759	1.2084	0.270903	0.841369	0.13435	0.902356	0.149295	0.379878	0.0591058	0.198105	0.0753219	1.71871
Innes-1	26.73	3.42432	1.81284	14.2666	0.190751	1.1179	0.0130331	1.4486	37.9695	0.392831	1.11077	0.132095	53.2618	54.6469	3.40506	989.004	97.7507	42.3536	0.633419	153.617	3.91513	40.8553	18.1064	3.93645	26.7907	7.2847	2.43275	4.09784	0.557076	1.88412	6.98053	11.6107	1.55115	6.07782	1.1702	0.324129	1.17699	0.189228	1.03864	0.228389	0.642199	0.100261	0.610559	0.0946508	1.03853	0.153274	0.490782	0.429914	2.27459
Innes-1	28.71	4.37756	2.31748	49.8129	0.176178	1.28762	0.00990948	0.898349	19.2681	0.156044	0.957068	0.111019	50.7369	62.8691	5.02442	628.968	85.8589	61.6124	0.718961	143.088	4.432	49.2271	14.8279	12.2913	28.3631	12.8629	6.21949	8.36691	1.15798	2.80633	26.2458	46.9828	5.5787	18.9963	3.33911	0.693556	3.21024	0.42748	2.3485	0.498303	1.38738	0.214559	1.4638	0.219551	1.63926	0.316567	0.666986	0.928197	3.14647
Innes-1	29.38	0.440808	0.233364	1.42466	0.017074	0.366977	0.0114174	0.715524	50.0755	0.371258	0.0870953	0.0454509	16.6866	8.95136	0.451328	369.246	15.9032	4.72024	0.250516	24.0753	1.52852	13.8025	3.4004	0.512223	2.87938	1.5366	0.536962	2.44616	0.424624	0.327762	1.43596	2.47015	0.360662	1.24023	0.247155	0.044291	0.257183	0.0382379	0.210943	0.04548	0.11853	0.018047	0.109785	0.0185398	0.13546	0.0320574	0.166249	0.166867	0.633919
Innes-1	30.27	6.38881	3.38224	23.1607	0.2945	2.03459	0.01271	1.22377	30.7879	0.107453	1.46939	0.144655	82.436	67.4773	5.53997	788.484	118.816	75.9769	1.36766	135.668	6.70521	46.7276	21.4246	9.52755	53.4011	10.1811	10.2853	5.5275	0.919369	5.41214	13.6586	26.3216	3.30222	11.8254	2.47861	0.494247	2.21883	0.309825	1.69659	0.343078	0.913264	0.145379	0.879244	0.137585	1.90331	0.65918	0.728707	0.735837	3.99234
Innes-1	31.52	6.88527	3.64506	23.7309	0.301786	1.97259	0.0159413	1.20897	31.6673	0.121835	1.44868	0.198941	70.0399	52.5513	5.9002	833.434	103.646	79.403	1.29128	84.8704	6.16325	34.5212	14.4515	7.86888	51.7687	13.6973	13.5689	1.71042	0.940795	5.04061	19.2463	34.4021	4.05267	14.9683	2.62286	0.6241	2.63234	0.370613	2.04113	0.428105	1.24068	0.175457	1.1383	0.164907	2.07215	0.823474	0.760563	0.344163	4.13589
Innes-1	32.15	1.68876	0.89403	5.60058	0.0566597	0.614644	0.0178802	0.614447	46.8218	0.0612258	0.292353	0.0492828	18.8822	18.7003	1.48276	462.982	67.1049	16.4702	0.420582	26.5822	2.24209	14.9267	6.5096	1.70707	10.9466	5.12531	3.07788	1.12302	0.600901	0.911015	7.42113	13.5708	1.65563	6.07484	1.03603	0.195283	1.02873	0.138245	0.70013	0.150282	0.407082	0.0701829	0.393878	0.0595227	0.463313	0.159285	0.260821	0.114721	1.45763
Innes-1	33.3	11.2211	5.94045	33.8356	0.477747	2.78663	0.0140025	1.96236	19.9618	0.128923	2.2575	0.149658	144.27	86.0386	11.5338	737.066	160.661	119.742	1.77907	182.696	8.33308	43.2443	23.9603	14.9835	87.0923	14.4224	20.5127	3.89474	0.924239	7.9752	24.9941	51.0031	6.28797	22.1491	3.84754	0.871727	3.50172	0.474542	2.59862	0.549715	1.50008	0.229599	1.41565	0.214672	3.25104	1.33539	0.964641	0.667468	4.61181
Innes-1	34.6	1.03157	0.546113	3.32053	0.0421957	0.605701	0.0173416	0.564747	48.0432	0.0553703	0.211471	0.0605657	22.4227	11.0662	0.827086	437.438	53.1158	11.2924	0.366609	17.5276	1.7443	13.0797	9.29292	1.14242	7.38923	3.45462	2.03679	0.609299	0.527858	0.637202	4.22677	6.99442	0.823796	3.11201	0.520538	0.131866	0.570845	0.0852998	0.48316	0.10579	0.289524	0.0431124	0.289871	0.0468375	0.293497	0.0911632	0.206069	0.0857511	1.28133
Innes-1	35.35	2.25338	1.19294	6.81314	0.0828688	0.630295	0.0163722	0.821925	43.9883	0.0782786	0.401903	0.0450251	29.4303	14.5518	1.6458	447.305	56.1193	21.6947	0.54584	31.6058	2.29127	10.1486	8.06172	2.4865	16.0744	6.16229	3.81282	0.526665	0.598954	1.37823	8.89915	15.3809	1.89674	6.77402	1.30034	0.271785	1.24961	0.163736	1.00248	0.210592	0.563503	0.0842195	0.531591	0.0839172	0.600737	0.221396	0.25883	0.121674	1.88153
Innes-1	36.12	12.0248	6.36593	31.7546	0.459367	2.81915	0.0158336	1.25138	23.4207	0.137347	2.37959	0.153916	129.632	74.1919	12.1838	1002.27	137.244	124.864	1.81166	164.948	8.00891	29.2512	15.957	16.617	88.194	18.2366	20.5996	2.31773	1.26511	7.60163	32.4543	64.6439	7.72057	27.2711	5.01169	1.0348	4.39732	0.631415	3.32989	0.684178	1.85762	0.284742	1.92124	0.290783	3.25792	1.37045	0.850159	0.691803	7.26984
Innes-1	37.15	10.4479	5.53112	29.3135	0.438161	2.94517	0.0156182	1.60046	23.3621	0.130567	2.07546	0.132521	119.935	87.6959	9.18739	879.809	144.371	108.963	1.72306	245.065	8.68134	37.1512	16.6702	13.5114	84.0978	16.1308	19.5277	7.99158	1.0226	7.59145	26.1257	50.693	6.11116	21.6319	3.85965	0.839515	3.6409	0.506897	2.80956	0.592229	1.63124	0.227593	1.54951	0.234188	2.85448	1.21217	0.844186	0.902704	4.75054
Innes-1	37.6	1.14653	0.606973	3.81075	0.047742	0.390047	0.0221886	0.774	48.7271	0.054343	0.270987	0.0582239	22.569	15.0971	1.44641	642.233	13.2153	11.9628	0.416509	27.9459	1.74028	8.80546	5.19817	1.2735	8.06826	4.79654	1.79535	0.33153	0.479163	0.688096	4.69942	7.48345	1.0418	3.7744	0.698086	0.196289	0.759445	0.113733	0.690085	0.137429	0.367249	0.0641673	0.425658	0.0595227	0.315092	0.0771381	0.149325	0.0637339	1.78904
Innes-1	38.31	1.27166	0.673217	3.59466	0.047742	0.773793	0.0199267	0.654779	47.1638	0.0619449	0.275348	0.111658	16.4762	14.2845	1.34947	447.086	19.8535	15.2295	0.38494	28.3169	1.9109	14.2542	5.78257	1.4792	8.73127	6.75727	2.2	0.763615	0.488902	0.680971	7.02259	13.0308	1.70586	6.57511	1.27713	0.284871	1.33029	0.191189	1.01052	0.215536	0.578077	0.0822143	0.471883	0.0751352	0.443681	0.12823	0.273763	0.0984979	1.87864
Innes-1	39.29	1.33982	0.709301	3.93081	0.0462195	0.567489	0.0203575	0.558436	46.773	0.0521857	0.261286	0.0552435	13.9055	10.5455	1.18643	462.873	22.5007	14.2051	0.330967	19.8439	2.19091	11.7747	5.70036	1.47315	7.5675	4.91871	1.93924	3.20878	0.694397	0.623969	5.58162	10.2806	1.29095	4.88732	0.967434	0.194276	0.948046	0.130401	0.761404	0.149293	0.398338	0.0601568	0.362098	0.0546438	0.407362	0.11721	0.29666	0.252618	1.68885
Innes-1	39.85	7.69506	4.07376	21.7	0.28928	2.90757	0.0162645	1.10839	29.0975	0.117623	1.74736	0.0938821	68.2102	53.3852	6.66361	866.653	126.859	75.1687	1.00818	74.783	8.85396	39.8213	22.3062	10.184	51.5183	10.2606	10.3143	13.0422	0.891126	4.14181	15.7415	30.6618	3.71813	13.2676	2.50484	0.525452	2.34994	0.344141	1.90552	0.397456	1.02402	0.149389	1.06607	0.161004	2.09571	0.686228	0.61522	0.789142	3.87192
Innes-1	40.32	10.1224	5.3588	24.1611	0.430983	2.61183	0.0191727	1.00584	27.5049	0.11146	2.09399	0.245775	76.7823	48.4134	6.5876	666.133	67.9296	118.034	1.27906	108.494	7.87744	26.3401	15.0161	9.79375	52.3195	13.2007	12.6804	1.0155	0.8921	3.65526	20.538	41.1925	5.24919	19.0062	3.62359	0.752946	3.23748	0.465717	2.22595	0.478529	1.24748	0.177463	1.21438	0.177592	3.31976	0.696246	0.51567	0.397468	6.92012
Innes-1	40.55	4.90555	2.597	17.0579	0.223702	1.66364	0.0234812	0.756053	36.8556	0.0987214	1.17181	0.094095	77.688	46.9593	4.1189	568.888	36.1131	60.1555	0.851348	71.835	4.73208	21.8129	10.3706	5.9793	37.7474	9.91887	9.50018	0.506754	0.730431	3.2196	14.8102	27.3716	3.3414	12.1338	2.15478	0.449956	2.08368	0.30002	1.65741	0.355931	0.919093	0.152397	0.920654	0.149295	1.52147	0.614099	0.442998	0.227124	4.21681
Innes-1	41.04	5.46508	2.89321	18.1183	0.268726	1.38925	0.0201421	0.933948	35.6929	0.106118	1.71248	0.185316	77.0567	69.1025	4.84596	805.368	49.2673	59.9847	0.795338	90.2951	6.69015	36.2779	15.957	6.31507	37.3468	10.5784	5.43626	0.406199	0.603823	2.55797	10.8248	20.0012	2.70044	10.4728	2.15075	0.5023	1.99997	0.298059	1.70964	0.343078	0.925894	0.143374	0.902356	0.140513	1.6	0.331594	0.38725	0.359227	2.84011
Innes-1	41.2	3.64	1.92702	10.0346	0.131481	1.60775	0.0305901	0.936906	41.2329	0.0907087	1.06575	0.21363	70.5156	22.1539	2.57225	678.193	42.4255	29.1728	0.553987	52.3521	4.25536	18.6509	6.80774	3.5412	18.9989	7.50918	2.22318	0.552551	0.584345	1.05148	6.79828	11.3207	1.63554	6.42691	1.24687	0.299971	1.2486	0.19217	1.20037	0.247174	0.631512	0.0902352	0.605744	0.0907477	0.858896	0.147264	0.224983	0.217854	2.02893
Innes-1	41.78	4.82111	2.5523	13.2961	0.158234	1.06506	0.0253123	0.880698	38.7023	0.085675	1.58058	0.132095	52.7952	34.9308	4.21254	727.857	51.7108	39.4966	0.517326	63.6728	3.99643	21.8832	10.5588	3.73278	23.2153	7.86378	2.66646	0.98364	0.611614	1.04029	7.66947	14.3609	1.85454	7.08433	1.44157	0.325136	1.31113	0.218642	1.23653	0.262993	0.717981	0.10728	0.659674	0.110263	1.07976	0.155278	0.249871	0.263047	2.33143
Innes-1	42.05	3.43246	1.81714	11.2852	0.159974	0.867595	0.023158	0.939963	41.3892	0.101187	1.14565	0.26717	66.591	31.9798	2.80248	785.963	42.0691	38.8364	0.65786	52.7031	4.17708	19.5443	9.68021	3.96771	21.4025	8.22036	2.42309	0.471908	0.571684	1.25099	7.51426	13.2108	1.83144	7.35087	1.36389	0.359361	1.42913	0.234329	1.24557	0.251129	0.658716	0.100261	0.6173	0.0917234	0.980614	0.15628	0.399196	0.210901	2.38346
Innes-1	42.18	1.27064	0.672677	3.99684	0.0537234	0.636799	0.0386685	0.606164	47.3299	0.0806413	0.374216	0.125921	50.6179	13.9638	1.01678	535.231	18.0107	13.2718	0.412435	21.5284	2.55422	8.79743	3.11712	1.56188	8.20647	4.53133	0.985075	0.749677	0.430467	0.572056	3.64798	5.68134	0.819777	3.17367	0.606285	0.154012	0.69994	0.100007	0.614749	0.125564	0.340045	0.0541411	0.290834	0.0507406	0.380859	0.058104	0.174213	0.0695279	1.23701
Innes-1	42.51	13.3168	7.04991	32.2448	0.480139	2.56508	0.0110943	1.06895	20.8998	0.117829	3.03907	0.0886664	81.1186	43.4951	5.05307	568.45	79.2207	98.4911	1.03465	79.7465	7.87041	32.3931	23.4948	10.9704	51.4181	7.95019	10.9324	2.19328	0.783022	3.19924	14.1193	24.5815	2.93452	9.75873	1.69477	0.314063	1.60159	0.247075	1.341	0.294631	0.79862	0.136355	0.828203	0.139537	3.71828	0.904619	0.482818	0.508712	4.90372
Innes-1	42.63	3.95537	2.09397	18.2084	0.178353	7.27756	0.0158336	1.05909	31.8627	0.0867023	1.82584	0.0606721	42.8693	36.278	4.04399	741.452	35.4207	36.3778	0.549914	41.1818	4.95288	23.5796	7.05834	3.30021	28.1027	8.60675	2.60272	2.15445	0.908656	1.59911	9.76433	16.411	2.26946	8.36334	1.63223	0.388553	1.56226	0.242173	1.3862	0.29562	0.827767	0.117306	0.808943	0.123924	0.955093	0.152273	0.299646	0.105451	2.34492
Innes-1	42.84	7.46413	3.95151	25.0715	0.368451	2.28052	0.014218	1.08177	27.4756	0.111562	3.3868	0.159663	45.7327	56.9564	6.35737	685.648	56.3433	48.2724	0.694521	66.9317	7.45391	27.4945	23.4948	7.61276	43.5962	11.0055	4.08806	4.38058	0.63791	1.70192	10.8448	20.1812	2.88529	11.726	2.39891	0.623093	2.30859	0.341199	1.91858	0.378671	0.976415	0.145379	0.875392	0.134658	1.34577	0.245439	0.402183	0.316352	1.88249
Innes-1	42.95	2.36427	1.25164	10.6049	0.117452	0.824403	0.0235889	0.728935	41.9266	0.0780731	1.19143	0.0678037	31.5344	27.5747	2.90493	821.703	18.9779	20.5223	0.531583	26.532	3.81176	14.3445	9.02945	1.73833	16.4049	7.56182	1.49693	0.802443	0.520067	0.778689	6.55195	10.1606	1.41854	5.54771	1.09555	0.293931	1.25667	0.181385	1.09791	0.245197	0.632484	0.0842195	0.576853	0.0868445	0.556565	0.0901614	0.245889	0.120515	1.75243
Innes-1	43.42	13.3473	7.06606	29.1534	0.425328	3.14436	0.018311	0.896081	21.9355	0.116288	2.14523	0.17861	62.4468	57.7048	6.1073	618.114	101.09	86.6649	0.784136	61.7677	8.99949	33.166	25.2579	10.2545	39.1094	9.22457	7.0288	1.82292	0.858013	2.75646	13.4884	27.1416	3.65986	14.103	2.73988	0.717715	2.357	0.322571	1.61221	0.343078	0.896747	0.127332	0.869614	0.134658	2.89473	0.447802	0.435034	0.251459	3.77943
Innes-1	43.52	3.30326	1.74875	9.7805	0.145184	0.872982	0.0233735	0.549462	40.6955	0.0579385	0.848934	0.0519438	26.329	19.6305	4.16297	792.76	17.6136	26.1224	0.549914	26.903	3.3782	10.8713	9.8476	2.70833	16.1545	9.09842	2.28692	0.662065	0.635962	0.934427	9.3758	15.4909	2.12881	7.90584	1.49402	0.391572	1.53906	0.23531	1.35908	0.294631	0.795705	0.126329	0.808943	0.122948	0.877547	0.124222	0.226974	0.0857511	2.29579
Innes-1	43.78	4.66953	2.47205	15.5271	0.193687	1.37807	0.0164799	0.928425	35.9762	0.0646158	1.42034	0.0472604	36.4197	24.8696	4.15085	821.594	22.7654	38.0966	0.679245	35.376	4.3768	15.4989	16.4127	3.79227	24.4772	7.98794	3.12327	0.800452	0.618432	1.34362	8.65081	14.7909	1.89172	7.21561	1.40525	0.342248	1.36458	0.223544	1.24456	0.282767	0.725753	0.110287	0.725159	0.104409	1.06798	0.19535	0.298651	0.12515	2.48173
Innes-1	43.9	2.47719	1.31142	13.8864	0.116364	0.56383	0.0159413	0.646496	38.6632	0.055473	0.884252	0.0376806	34.773	21.0205	2.62733	859.198	20.3015	25.1435	0.627309	24.667	3.15941	14.8063	11.1234	2.668	17.5767	7.10591	2.04548	0.243919	0.657388	1.05556	7.53729	11.8507	1.61846	6.04102	1.25494	0.31507	1.21027	0.177463	1.05974	0.231355	0.58002	0.0972535	0.549888	0.0868445	0.680246	0.115206	0.224983	0.0984979	1.49713
Innes-1	44.18	2.23609	1.18379	9.27327	0.10538	0.948694	0.0232657	0.648764	42.6888	0.0544457	0.735896	0.0444929	31.6991	12.3172	2.41362	834.969	52.1079	21.0231	0.485757	20.4455	2.86936	9.21904	10.0734	1.71716	12.6292	7.3284	1.64662	0.832311	0.586293	0.740009	6.78326	10.3806	1.46073	5.63822	1.10362	0.310037	1.18607	0.181385	1.02559	0.233332	0.597508	0.0902352	0.578779	0.0761109	0.564418	0.0891596	0.206069	0.0834335	2.17729
Innes-1	44.35	5.65125	2.99177	18.2084	0.200538	1.44006	0.0189573	1.41014	33.2111	0.0674922	1.3811	0.0699326	44.6715	29.093	4.6653	908.533	38.0882	55.9213	0.687392	48.4415	6.04081	19.6346	17.0862	9.30673	28.2329	10.8963	3.91519	1.57601	0.846326	1.85969	13.178	24.4915	3.11134	11.4674	2.16084	0.528472	2.17345	0.319629	1.67951	0.384603	1.00265	0.146382	1.01696	0.133682	1.52049	0.255457	0.279736	0.193519	1.68114
Innes-1	44.62	2.32764	1.23225	15.4571	0.110492	0.912515	0.0243429	0.569579	40.8616	0.0684167	0.624601	0.0378935	40.2345	19.5664	2.47531	891.978	14.7222	25.1321	0.487769	19.1434	2.98005	14.0372	9.24076	1.78001	13.4713	7.2918	1.9063	0.995948	0.170546	0.995851	7.40531	10.8614	1.50474	5.83813	1.14278	0.315972	1.15034	0.18193	1.043	0.231939	0.618497	0.0927486	0.576026	0.0909707	0.692291	0.109721	0.46569	0.087872	2.24721
Innes-1	44.8	4.30838	2.28086	18.9187	0.185857	1.19819	0.0199267	1.44663	34.6083	0.0709849	1.06422	0.0496021	62.2547	44.8851	3.7025	915.33	70.3019	49.3309	0.662997	40.6772	5.80471	27.5556	19.0312	6.24019	24.704	8.90931	3.13074	1.46185	0.272874	1.92064	9.35366	15.4977	2.02271	7.69821	1.51022	0.366936	1.4898	0.235323	1.36074	0.293657	0.794789	0.116191	0.739637	0.110176	1.25206	0.212461	0.464688	0.167858	1.87637
Innes-1	44.88	3.80887	2.01642	13.2761	0.184117	1.89739	0.0211115	1.065	37.3344	0.0722177	0.823972	0.0681231	56.0978	26.3772	4.13212	978.37	40.827	41.6251	0.553351	50.4305	6.75546	21.9611	18.9625	8.57367	17.6371	12.0963	2.86961	2.99205	0.280899	1.3542	11.6423	19.7943	2.51459	9.9571	2.04568	0.477017	1.94711	0.317389	1.82272	0.385238	1.00063	0.152882	0.940035	0.139488	1.03151	0.180542	0.426632	0.287274	1.11638
Innes-1	44.98	2.91159	1.5414	12.4057	0.118539	0.745236	0.0260663	0.703592	41.1547	0.0516721	0.630487	0.0464088	45.6595	19.9085	3.31583	862.158	29.0371	30.607	0.518511	24.4083	3.29799	11.6671	8.69112	2.17737	14.3245	11.3166	2.44598	0.86659	0.182585	1.00194	11.6423	18.4554	2.39915	9.25944	1.86854	0.438284	1.91286	0.291681	1.71681	0.381257	0.979944	0.152882	0.966174	0.157683	0.906902	0.129671	0.359533	0.0822392	1.49878
Innes-1	45.33	1.58805	0.840714	15.107	0.0714499	0.615457	0.0367297	0.501734	42.0537	0.0467412	0.351433	0.0371484	76.9469	18.3796	1.80553	760.857	11.2503	19.2589	0.454978	17.0657	2.65291	13.4065	6.41995	1.57018	8.28052	9.49214	1.38499	1.0927	0.0391253	0.615174	9.16857	12.4701	1.62219	6.36487	1.2521	0.306799	1.29035	0.198739	1.11562	0.258816	0.685469	0.119248	0.676709	0.108154	0.510318	0.0927645	0.306454	0.0856189	1.70684
Innes-1	45.92	0.70043	0.370808	12.5258	0.0320818	0.259862	0.0595646	0.460712	44.2619	0.0413993	0.133423	0.0279943	38.8806	12.9373	0.702494	755.046	12.1667	9.55203	0.394519	13.2128	1.87493	10.1068	4.95556	1.04003	3.97112	4.9645	1.08904	0.67308	0.0280899	0.392859	5.17735	7.13636	0.883368	3.20342	0.630607	0.149832	0.570132	0.100853	0.571934	0.140358	0.365386	0.057076	0.392085	0.0586256	0.239335	0.0518683	0.215319	0.0597079	1.06148
Innes-1	46.92	4.20156	2.22431	16.5976	0.206628	2.28256	0.0249891	1.00189	35.644	0.0696495	0.764782	0.0910082	81.9511	30.7289	6.3827	982.645	49.1553	43.8105	0.67017	92.55	7.33205	35.0218	19.5317	7.40794	19.966	13.306	3.45572	5.87578	0.396269	1.58463	12.4284	22.792	3.02955	11.5443	2.44145	0.623791	2.47292	0.37177	2.21713	0.479806	1.21828	0.185497	1.17335	0.174866	1.05921	0.223433	0.443657	0.540751	1.39861
Innes-1	47.1	4.80585	2.54422	29.6537	0.22827	1.97869	0.0217578	1.04035	29.1562	0.0629722	0.944968	0.0539662	55.6312	35.4333	6.90376	802.956	30.9002	45.2105	0.721406	56.0585	6.95993	20.1708	18.0202	5.44344	24.965	9.50813	3.36577	1.21996	0.205658	1.85973	9.58451	17.5361	2.34996	9.10652	1.94243	0.451535	1.81616	0.288715	1.66738	0.360352	0.953353	0.136575	0.920673	0.145553	1.17591	0.238395	0.403598	0.166732	1.85036
Innes-1	47.25	3.23917	1.71482	24.3712	0.143552	1.15042	0.0308056	1.01077	33.3479	0.0542403	0.599857	0.0463024	45.7601	26.7514	4.0506	828.281	28.416	33.3615	0.612785	46.6381	4.28657	15.8986	15.753	5.03999	16.6333	8.33149	2.2245	1.48919	0.348115	1.47906	8.18943	12.7499	1.65933	6.13198	1.23692	0.342473	1.24502	0.204671	1.20237	0.269766	0.766228	0.107018	0.713498	0.11523	0.882177	0.159595	0.318472	0.229819	1.46314
Innes-1	47.36	3.61863	1.9157	16.3575	0.173785	1.39027	0.0282205	1.0226	36.6113	0.0573221	0.639535	0.0796188	43.0065	23.1054	4.7997	904.148	26.6037	33.3274	0.566673	49.7043	5.76893	14.9832	15.9493	5.25489	15.6897	8.63639	2.45662	1.6827	0.138443	1.18568	9.10987	15.4977	2.04881	7.98407	1.60233	0.390379	1.59859	0.235323	1.27601	0.284698	0.744561	0.107018	0.710593	0.102089	0.899979	0.154607	0.302448	0.277135	1.31288
Innes-1	47.5	1.08651	0.575198	11.8955	0.0480683	0.590152	0.0643039	0.495818	43.1089	0.0405775	0.162636	0.0331036	63.014	20.0689	1.69096	842.643	11.2096	11.1808	0.313566	20.2428	2.27465	12.1452	6.56815	1.59755	4.31041	6.85493	1.04455	1.06431	0.111357	0.409101	7.4083	10.5816	1.31803	5.00554	0.907952	0.267048	0.936789	0.141391	0.835205	0.211035	0.520995	0.0815372	0.505354	0.0758089	0.305597	0.0458835	0.230341	0.158846	0.569268
Innes-1	48.1	3.08861	1.63511	26.4522	0.140181	1.73885	0.0342523	0.521259	34.3933	0.059274	0.554075	0.0317198	128.535	24.025	3.7741	728.734	26.0234	36.2071	0.553351	27.535	4.49308	13.8541	12.2785	2.94371	15.1979	15.1754	2.56205	1.29989	0.284912	1.26791	13.115	20.4538	2.57883	10.0151	2.09629	0.420957	2.10929	0.351006	2.05271	0.467861	1.35321	0.208939	1.34955	0.21934	0.973164	0.191514	0.240356	0.238832	1.58644
Innes-1	48.33	11.5568	6.11817	30.354	0.62032	7.20438	0.0282205	1.34013	15.8385	0.0617394	1.34077	0.0595012	119.386	111.09	18.7714	635.765	181.838	95.0422	1.0196	152.199	24.0346	49.7812	62.1776	17.1108	42.5319	9.78005	8.33608	2.69337	0.2498	4.83714	11.5926	25.5898	3.35178	12.164	2.63175	0.440323	2.28456	0.369793	2.07893	0.417093	1.10699	0.177343	1.13559	0.176887	3.20234	0.432901	0.660979	0.58694	0.94011
Innes-1	48.43	1.04683	0.554192	16.4176	0.033278	0.469723	0.0849846	0.860384	41.9266	0.0401666	0.163944	0.0219271	44.2141	20.7746	3.95036	856.128	7.41199	10.6618	0.227489	30.3692	2.64166	10.3041	7.26894	1.32183	4.26323	16.9649	0.802755	0.7793	0.163524	0.419252	11.5826	17.5461	2.1251	8.57278	1.76833	0.359801	2.08813	0.353973	2.34927	0.536546	1.56988	0.250727	1.55575	0.28302	0.308564	0.0708202	0.204303	0.164478	0.501842
Innes-1	48.75	1.66536	0.881642	18.1384	0.0858051	13.2421	0.0264971	0.80526	28.7556	0.0482821	0.407244	0.0497085	58.5862	31.7767	2.01263	726.98	18.9372	18.7922	0.364802	35.4728	4.14242	20.1505	10.5314	2.86465	9.63769	5.35338	1.23798	2.87742	0.24679	0.782672	4.29373	6.93152	0.916495	3.58524	0.774341	0.229335	0.796775	0.123594	0.763587	0.173208	0.424478	0.0744027	0.40467	0.0616579	0.441089	0.076805	0.233346	0.137441	0.249476
Innes-1	49.27	8.75817	4.63658	16.7577	0.603137	2.86895	0.0890776	0.842929	34.3542	0.0452002	1.10204	0.0699326	98.9854	134.399	49.5392	447.634	54.0831	36.4461	0.405791	216.649	19.884	34.147	50.2819	9.42921	28.3379	20.3039	2.70712	0.708837	0.188604	3.04237	5.08282	10.2419	1.47362	6.67671	1.93636	0.644176	2.42961	0.479544	3.4084	0.769481	2.18542	0.366917	2.55484	0.429584	1.29261	0.16558	0.36454	0.0495688	0.405519
Innes-1	49.81	8.84362	4.68181	35.6664	0.350616	4.58137	0.0334984	3.40406	19.3365	0.0712931	1.14238	0.0552435	87.5316	121.675	64.8295	571.081	75.0158	67.7475	0.582043	214.329	20.3748	37.1375	36.4134	10.6233	33.0358	16.0352	2.01849	1.44923	0.319021	3.55096	4.99923	10.5217	1.47262	6.42484	1.9313	0.659465	2.15361	0.456803	3.1068	0.709754	1.9658	0.321053	2.20052	0.346699	1.61304	0.150618	0.324481	0.438234	0.432489
Innes-1	50.22	3.07538	1.62811	30.0038	0.183682	8.01741	0.0491166	1.065	26.6646	0.057733	0.615009	0.0243753	53.9296	60.7948	15.3233	494.557	17.2166	23.8573	0.342258	53.1638	7.23288	26.0604	7.83036	3.52556	16.282	17.4147	1.82312	1.58279	0.239768	1.45571	7.73368	12.7199	1.59006	6.5038	1.43329	0.438284	1.80307	0.34804	2.34826	0.58831	1.70382	0.280284	1.75615	0.314354	0.628996	0.147625	0.228338	0.138567	0.64151
Innes-1	50.5	5.1904	2.7478	16.3675	0.385525	2.05796	0.108573	0.799738	38.1258	0.0468439	0.932105	0.146465	70.1497	160.808	21.6906	522.294	38.0781	24.9955	0.42731	109.737	16.3775	55.1926	31.9967	6.49867	23.5396	15.2154	2.02817	0.441709	0.171549	2.16631	5.34154	9.15876	1.29193	5.52928	1.44645	0.503517	1.8071	0.330243	2.1909	0.509669	1.30889	0.204862	1.26435	0.200136	0.753609	0.101742	0.274407	0.043936	0.463313
Innes-1	50.77	3.22188	1.70566	33.3253	0.169435	1.4421	0.0900471	1.0512	30.016	0.0497203	0.525515	0.0277814	42.0825	114.405	17.163	502.999	24.6387	21.228	0.391445	63.6735	9.88988	40.1993	18.9232	4.05166	15.1979	13.256	1.53007	0.831885	0.108347	1.6161	5.25297	8.42833	1.13533	4.72467	1.13064	0.349608	1.38202	0.255098	1.81062	0.447952	1.32169	0.206901	1.36697	0.241578	0.606249	0.113711	0.252374	0.132935	0.632841
Innes-1	51.08	17.5692	9.30113	35.3463	0.798999	13.0592	0.0248814	1.21489	9.7337	0.0630749	1.96101	0.101759	87.0101	458.046	34.6124	371.219	96.0707	74.5541	0.904832	272.123	29.9027	92.8184	50.2328	15.0328	53.062	10.4368	6.7267	0.620495	0.4996	7.82571	9.16161	17.3862	2.19838	8.49682	1.91105	0.587097	2.01158	0.33222	1.96495	0.44397	1.14737	0.167151	1.12979	0.164758	2.26577	0.643366	0.703042	0.102517	1.60955
Innes-1	51.25	1.8729	0.991513	21.3999	0.0993991	0.628669	0.114928	0.547687	38.4873	0.048693	0.258997	0.0560951	29.842	70.9308	11.9194	538.63	20.2302	14.1254	0.364802	39.5072	5.72906	24.2192	8.90313	2.60819	8.34878	9.55412	1.36662	0.42383	0.115369	1.03138	7.27297	10.5816	1.25579	4.90758	0.99399	0.304761	1.04155	0.193795	1.28206	0.306598	0.836153	0.131479	0.890662	0.152629	0.40054	0.0877771	0.304451	0.0529485	0.802369
Innes-1	51.65	2.12723	1.12616	18.9887	0.0942878	0.635071	0.0890776	0.713749	40.7639	0.0518775	0.318078	0.0818541	66.5452	22.3784	2.42243	629.187	17.2573	23.7321	0.470349	43.814	4.24363	17.9127	7.72534	2.80889	10.6907	8.37447	2.13165	2.69547	0.116373	1.08417	8.26605	12.2103	1.54489	5.80414	1.05675	0.262971	1.20675	0.171054	1.03997	0.217008	0.63524	0.0978446	0.575058	0.0909707	0.628007	0.131666	0.387574	0.0428095	0.57312
Innes-1	51.9	7.96872	4.21864	33.0852	0.349419	3.9523	0.0247737	1.88249	25.2478	0.0710877	1.162	0.110061	85.8117	59.7363	8.38763	747.591	56.4146	70.3768	0.929425	135.86	12.4416	33.0179	16.7639	8.65679	33.5577	12.1063	6.07676	0.621547	0.220707	3.05354	14.1499	25.6697	3.27549	12.254	2.44044	0.603406	2.33593	0.347051	1.94881	0.423065	1.11487	0.166132	1.07848	0.162736	1.81578	0.394997	0.571847	0.192643	2.22409
Innes-1	52.13	9.77041	5.17246	31.8847	0.510481	3.39944	0.0308056	1.14882	24.1633	0.0685195	1.26228	0.098672	274.909	137.499	20.1153	735.422	52.7595	78.72	1.13847	137.574	14.0773	40.6875	28.905	9.2579	38.9784	14.2757	8.86319	1.63853	0.238764	4.10421	13.8812	27.6281	3.66999	14.7427	3.34738	0.87555	2.96449	0.483499	2.79612	0.554464	1.47435	0.217093	1.40763	0.21833	2.22918	0.429908	0.714058	0.171238	1.91682
Innes-1	52.43	3.32361	1.75952	20.2193	0.140072	1.79678	0.0337138	2.34794	36.2693	0.0585549	0.514506	0.0459831	70.8724	18.2085	3.11204	854.922	17.4202	32.1322	0.667096	60.7183	3.58015	12.8878	14.3887	3.02177	15.1778	9.31019	2.87444	1.93405	0.152488	1.33592	9.49297	14.9981	1.94943	7.42435	1.49503	0.329223	1.46059	0.232356	1.30324	0.29963	0.789865	0.11721	0.726083	0.125337	0.786245	0.175554	0.352522	0.134061	1.56621
Innes-1	52.6	6.43663	3.40755	25.6618	0.281993	1.99495	0.0273588	2.51459	29.3125	0.0618421	0.947911	0.0714228	77.6971	23.8218	4.1861	759.431	49.3895	61.3734	0.93045	87.5372	7.009	17.8618	20.4151	6.96294	30.3054	8.19553	5.61735	1.96876	0.421349	2.88909	10.3786	18.2755	2.38008	9.03755	1.77238	0.442361	1.78393	0.236311	1.3678	0.272753	0.742591	0.114152	0.699944	0.119273	1.61601	0.379038	0.517767	0.205035	2.3888
Innes-1	52.7	5.56376	2.94545	21.2598	0.237623	2.01629	0.0292976	2.7483	31.5207	0.0589658	0.798683	0.0797253	68.0639	29.1144	4.17288	800.654	61.2812	51.5391	0.81978	95.9187	5.86298	19.9776	17.9613	6.3304	24.9148	8.33648	4.72271	4.36555	0.447433	2.25158	10.0602	18.3155	2.34695	8.98158	1.85133	0.414841	1.77587	0.263008	1.31636	0.278725	0.743576	0.119248	0.692199	0.106132	1.34997	0.304228	0.484718	0.254604	1.96402
Innes-1	52.75	2.04991	1.08522	12.4857	0.0825426	0.814037	0.0394225	2.49487	40.2754	0.0499257	0.274476	0.038745	41.5245	12.9266	1.648	752.963	9.90233	20.4881	0.527733	40.1628	2.48525	6.96977	6.29923	1.71514	8.38492	5.85623	1.92274	0.699372	0.121389	0.819217	6.28984	10.0021	1.2839	4.97155	0.931233	0.231373	1.01133	0.137436	0.835205	0.17719	0.48554	0.0754219	0.428873	0.0758089	0.538998	0.0957569	0.210312	0.0642142	1.36393
Innes-1	52.95	1.37136	0.725998	9.71948	0.0503521	0.437202	0.0682893	0.9373	46.1867	0.0424266	0.161546	0.0362968	68.8506	10.1424	0.964456	690.691	7.95058	13.3514	0.428335	19.5368	1.98738	5.00863	4.92023	1.13126	4.86853	3.77286	1.22831	0.399641	0.132424	0.548175	4.01113	6.11616	0.810089	3.01252	0.572911	0.135562	0.583227	0.0879988	0.475099	0.106513	0.304324	0.0448455	0.292369	0.0384098	0.333289	0.0688253	0.238353	0.051822	0.852457
Innes-1	53.12	6.98293	3.69676	24.5813	0.278513	2.2165	0.0255277	3.79062	27.9544	0.059274	0.92938	0.0815348	84.906	26.7835	4.70386	809.534	43.8101	66.3133	0.999106	105.198	7.75836	16.3055	18.8839	6.58585	29.3417	8.02858	5.39683	2.61975	0.456462	2.80889	9.688	17.686	2.21645	8.5418	1.59018	0.399552	1.49685	0.233345	1.29719	0.279721	0.736682	0.118229	0.742541	0.119273	1.80391	0.384025	0.488724	0.21968	2.73942
Innes-1	53.33	7.99517	4.23264	34.3058	0.382371	3.53766	0.0259585	2.63588	19.8348	0.0666704	1.3702	0.104526	100.632	38.2453	6.01477	623.705	56.0786	94.8715	1.16819	124.967	11.7771	29.1017	23.8405	11.9107	43.867	10.6068	6.64256	5.96096	0.251806	4.51128	11.1149	20.3939	2.40517	9.3484	1.91409	0.47192	1.82624	0.269929	1.60283	0.36732	0.940549	0.156959	1.00684	0.150607	2.46258	0.467812	0.658976	0.686078	2.14126
Innes-1	53.65	6.2118	3.28853	16.6777	0.166173	1.56608	0.0277896	5.94922	30.0062	0.0689304	0.742872	0.089518	128.901	23.5545	4.60581	1025.18	38.0272	85.0827	0.686565	82.948	5.0257	21.2491	12.4748	4.4622	16.9445	9.67308	4.36196	2.81957	0.589889	1.24659	11.2144	21.6629	2.62501	9.61127	1.87158	0.381206	1.75371	0.269929	1.5998	0.362343	1.00851	0.153901	1.04653	0.165769	2.35181	0.411954	0.354525	0.70185	4.46649
Innes-1	53.98	5.65939	2.99608	20.2193	0.273402	1.95532	0.0249891	0.96215	33.3576	0.0526994	0.798356	0.0952658	68.1188	34.3748	4.28635	739.259	76.0543	49.3423	0.797236	292.598	6.80249	40.6977	18.1282	6.4267	20.6586	9.02927	5.03414	18.4256	0.325041	1.74401	10.3587	19.1548	2.41019	9.05055	1.78048	0.422995	1.6973	0.258064	1.43034	0.29963	0.837138	0.127402	0.780297	0.138478	1.35788	0.29126	0.486721	0.746912	2.07383
Innes-1	54.3	3.2117	1.70027	20.0792	0.136375	1.25917	0.0193881	0.636339	36.8849	0.0552676	0.620786	0.0952658	60.1963	30.3867	3.68267	914.563	77.2761	38.0966	0.81773	284.932	4.80795	39.9857	17.6963	5.07953	17.597	10.5068	3.05144	20.8234	0.27789	1.67193	10.5875	19.8543	2.60192	10.5548	2.23192	0.595251	2.22815	0.314423	1.73598	0.366325	0.894261	0.12944	0.813213	0.122305	0.905913	0.147625	0.368546	0.908011	1.65675
Innes-1	54.55	5.69601	3.01547	24.7414	0.236861	1.88011	0.0273588	1.06697	32.1851	0.0552676	0.817105	0.0924983	64.9351	36.5774	4.4604	871.367	62.4012	69.7621	1.03497	308.534	6.28724	34.7878	15.8413	7.9685	26.7518	10.1769	4.70627	25.3667	0.352127	2.85863	12.0901	21.1932	2.58686	9.45035	1.7491	0.447458	1.92394	0.279816	1.57458	0.340443	0.8982	0.135556	0.881949	0.136456	1.71095	0.312207	0.424629	1.13445	2.23854
Innes-1	55.35	3.43043	1.81607	29.7237	0.153775	1.42279	0.0182033	0.77262	31.8725	0.0571167	0.667222	0.0622687	59.5559	38.3523	3.50861	799.667	96.1217	46.3146	0.960167	366.932	5.1719	46.7296	19.9439	6.74398	23.3589	9.74706	3.83872	23.1687	0.444423	2.42517	10.4582	16.6368	2.03275	7.54129	1.60739	0.441342	1.70032	0.242244	1.44244	0.323521	0.820396	0.133517	0.802564	0.137467	1.0325	0.225428	0.417619	1.28316	1.86096
Innes-1	55.74	3.18016	1.68358	25.8319	0.1342	1.34047	0.0150797	0.702901	31.8236	0.0539321	0.607923	0.0734452	66.5727	29.7024	3.72233	844.068	82.3871	36.5144	0.875115	327.193	6.10016	52.2835	14.3887	7.02578	22.7265	9.50013	3.85226	25.1879	0.489568	2.29117	12.9459	23.6313	2.68323	9.68124	1.8817	0.465805	1.83933	0.263996	1.53827	0.339448	0.935625	0.14269	0.94778	0.133424	0.920748	0.215453	0.459681	1.56818	1.38223
Innes-1	56.08	5.97977	3.16569	32.0369	0.247337	2.35657	0.0165032	0.965524	25.0228	0.0707479	0.954561	0.0918705	83.9479	59.2347	4.78536	766.36	111.767	63.7029	1.20005	364.037	8.74633	67.783	24.6738	12.7659	33.6664	9.54669	8.38242	44.6566	0.787485	3.83458	13.7398	25.7622	3.1449	11.4915	2.14319	0.549514	1.9082	0.285347	1.61203	0.345445	0.835619	0.135473	0.809039	0.122899	1.57429	0.419867	0.825126	2.02253	1.8071
Innes-1	56.32	2.12465	1.12479	8.90316	0.049966	0.352358	0.117987	0.523651	44.5364	0.0351047	0.155187	0.0574322	22.5575	14.3286	2.4393	647.845	15.9255	16.722	0.560022	99.8857	1.96648	15.545	5.10435	1.77462	5.86218	9.56867	1.82235	5.92549	0.227905	0.749285	14.1395	21.3049	2.39476	8.87945	1.61442	0.396065	1.67148	0.221715	1.26959	0.273143	0.744284	0.112894	0.748633	0.122899	0.527396	0.110491	0.290452	0.268568	1.42604
Innes-1	57.18	1.4126	0.74783	7.71527	0.0265546	0.299796	0.171033	0.550244	45.3936	0.0342433	0.105464	0.0538624	20.2337	11.4799	0.995242	670.649	23.4064	19.8211	0.640025	96.7066	1.53894	14.2114	5.32912	1.87829	3.85702	27.2263	1.92338	7.3957	0.157109	0.458181	31.6664	45.9353	5.0721	17.4542	3.04923	0.374292	3.41809	0.477235	2.87856	0.69089	1.80047	0.289419	1.8191	0.318738	0.578753	0.14163	0.264322	0.277478	1.97897
Innes-1	57.55	2.19575	1.16243	24.252	0.109145	1.12705	0.0132883	0.745255	34.1054	0.062887	0.462395	0.0549123	48.1015	33.4049	2.5062	923.518	98.931	40.503	0.921062	386.948	4.8772	48.3169	20.7096	6.64821	15.8484	10.4009	4.83009	30.6086	0.416048	1.67795	11.2216	16.2967	1.95159	7.57089	1.49401	0.388807	1.64781	0.250548	1.46177	0.303269	0.851166	0.129315	0.764477	0.122899	0.874055	0.163728	0.438191	1.38484	1.58416
Innes-1	57.98	3.22462	1.70711	29.9192	0.113047	1.23464	0.0142528	0.609433	32.208	0.060518	0.45775	0.0557523	58.7574	30.8976	3.38036	841.4	89.8009	30.4203	0.932345	256.249	5.80826	53.3924	17.4096	5.68163	14.6808	9.77049	4.22873	26.6632	0.213358	1.42784	11.8012	20.0529	2.35919	8.4093	1.86325	0.468642	1.85983	0.290318	1.52515	0.321344	0.836591	0.134446	0.85261	0.139885	0.751589	0.119532	0.505528	1.76542	1.45255
Innes-1	58.17	3.15038	1.66781	29.0318	0.141227	1.36168	0.013717	0.81064	31.6686	0.0593335	0.518981	0.0829459	47.969	33.1808	3.11603	891.39	96.2088	39.201	0.981577	289.252	5.75254	47.3516	21.2102	5.76802	15.5641	11.43	4.43368	25.2199	0.389863	1.5406	12.1809	20.7841	2.54926	9.72896	2.16828	0.485231	2.11714	0.299266	1.71426	0.367537	0.985253	0.146762	0.944704	0.144881	0.950103	0.162724	0.451256	1.54522	5.22094
Innes-1	58.4	2.15184	1.13918	16.205	0.0846496	0.791294	0.0470449	0.534612	39.7688	0.0510419	0.256112	0.106045	68.6357	19.0443	2.42065	815.675	46.485	48.6596	0.654385	144.424	3.33117	30.891	10.7379	3.22704	7.43687	15.5365	2.12736	13.2174	0.378226	0.74006	15.0088	25.3916	3.0829	11.2393	2.3248	0.435464	2.44958	0.35892	2.17834	0.488041	1.34865	0.209367	1.46657	0.238804	1.11701	0.125558	0.300503	0.840071	1.79433
Innes-1	58.47	3.31454	1.75472	25.5529	0.155642	1.44263	0.0171462	4.20999	29.1163	0.0771012	0.63289	0.0689816	49.4092	44.298	3.92108	995.526	91.8276	38.4692	0.956961	439.63	5.65427	48.6155	19.0749	5.4072	15.6657	8.64847	4.044	26.0194	0.369497	1.16339	10.1324	18.33	2.21485	8.0249	1.55923	0.368071	1.549	0.229669	1.37897	0.281176	0.753029	0.126236	0.783292	0.124897	0.854303	0.147657	0.80804	1.60886	1.43193
Innes-1	58.8	4.31204	2.28279	23.1125	0.107194	0.892011	0.0623693	0.499251	35.1649	0.0541647	0.383112	0.0912405	37.0304	24.3362	2.46343	578.645	32.3776	33.0997	0.616435	208.713	4.05454	24.7207	10.3906	3.13252	12.5792	7.67731	2.10811	17.1317	0.275426	1.51497	11.2716	19.6322	2.18334	7.92905	1.40973	0.322451	1.44402	0.198848	1.19701	0.248038	0.680155	0.106736	0.723877	0.115905	0.998497	0.207925	0.284422	0.70515	3.53661
Innes-1	59.1	2.74469	1.45304	31.4117	0.108169	1.50718	0.0127525	3.81635	26.6409	0.0677328	0.60048	0.0917655	51.6005	51.3929	3.12041	1136.85	76.9551	43.3976	1.05953	341.329	5.65022	54.8554	16.0711	6.05871	15.9093	9.45976	2.94905	28.2621	0.228875	1.26794	14.1295	26.4534	3.31059	11.9052	2.28868	0.523594	2.25917	0.322134	1.60386	0.344441	0.868655	0.135473	0.788243	0.125896	0.982695	0.171764	0.523618	1.87107	2.43074
Innes-1	60.58	4.32145	2.28778	33.8117	0.167023	1.94161	0.0150029	0.880695	27.2092	0.0607333	0.590134	0.116334	98.518	48.0749	3.27616	821.18	84.4062	41.5683	0.886189	315.391	7.99662	64.3993	17.7671	6.9511	14.9245	10.1312	3.48786	35.6132	0.262818	1.12956	11.2616	19.9026	2.44863	9.45453	1.90339	0.491452	1.89277	0.273416	1.46483	0.345445	0.853109	0.128288	0.808049	0.132891	1.10121	0.184822	0.58191	2.2491	1.55469
Innes-1	60.85	16.9909	8.99498	46.9814	0.271507	2.01025	0.0282912	0.47304	12.81	0.0494266	0.448566	0.162847	68.1586	20.6447	2.44478	517.647	66.4739	90.2494	0.672847	157.443	4.05251	17.5653	9.17169	5.6115	13.229	6.3165	3.13475	23.3614	0.383075	2.1638	14.1095	29.3681	3.69074	13.9028	2.49838	0.376365	1.97511	0.243589	1.18475	0.228958	0.607281	0.0892887	0.613958	0.0949219	3.57029	0.724221	0.577889	0.852799	7.3099
Innes-1	61.2	4.56612	2.4173	34.8705	0.185015	2.083	0.0156459	0.997931	25.5526	0.0581489	0.838962	0.0841009	69.0156	27.6222	2.93944	677.277	68.2125	73.904	0.901574	255.846	7.47891	43.0722	15.3253	5.1216	18.1226	14.5673	4.80507	37.0668	0.322946	1.09061	11.4315	19.1113	2.4466	9.36777	2.16527	0.505968	2.32813	0.356932	2.24479	0.493062	1.26995	0.182683	1.15761	0.183849	1.71651	0.1798	1.74372	1.80742	1.77862
Innes-1	61.83	1.47115	0.778827	30.5747	0.079447	0.877155	0.0120023	1.26385	31.4471	0.0611641	0.265719	0.0580622	76.3581	30.951	2.8517	828.369	43.3357	30.2696	0.893369	254.332	4.47296	49.5012	12.5668	3.78098	9.39736	12.3492	2.51319	27.9714	0.361739	0.947113	10.3723	16.6373	2.11524	7.71012	1.76593	0.405396	2.10479	0.321139	1.89212	0.406701	1.03772	0.166262	1.00709	0.16986	0.706158	0.110491	0.417085	1.20156	1.13238
Innes-1	62.39	5.08474	2.69186	24.6756	0.229887	2.24591	0.0145743	1.05321	30.561	0.0535186	0.532388	0.154342	703.763	36.0401	4.70091	1207.62	73.8356	52.8132	1.21954	232.835	8.89526	52.656	13.568	8.9666	16.1834	12.7789	5.64697	43.8883	0.243422	1.53035	16.5876	32.0926	4.02617	14.9925	2.76628	0.728884	2.69763	0.383776	2.12519	0.434819	1.16501	0.18063	1.12493	0.186846	1.41725	0.267188	0.760804	2.146	1.99763
Innes-1	62.88	3.87916	2.05363	34.1142	0.114347	1.12808	0.0100734	3.04621	26.4387	0.0634254	0.364849	0.0458828	61.8764	35.464	2.92518	836.57	59.7083	35.5101	1.06979	307.519	5.44354	52.6759	13.2513	4.44773	12.2543	7.49447	3.39453	29.4665	0.293852	1.26179	8.14593	12.791	1.52671	5.57324	1.35154	0.371181	1.48416	0.229669	1.15613	0.246029	0.633516	0.0974992	0.597124	0.0969203	0.891833	0.137612	0.659296	1.64196	1.72558
Innes-1	63.46	4.28904	2.27062	30.1814	0.182305	1.98771	0.012431	1.15901	28.3168	0.0556722	0.43178	0.104995	51.9186	31.5165	4.92795	1053.38	88.1417	64.4346	1.00517	230.917	8.76153	70.0919	15.2947	11.2819	14.9347	15.0369	6.49849	36.5684	0.384044	1.60005	21.6738	43.1207	5.26421	18.6044	3.27599	0.704	3.17828	0.454367	2.53612	0.547289	1.49148	0.241182	1.65967	0.261785	1.59602	0.279242	0.645226	2.37384	2.14593
Innes-1	63.81	3.51111	1.85878	23.5562	0.118683	1.00625	0.0689062	0.64327	34.8759	0.0471653	0.280815	0.0928155	46.6701	21.9036	2.12451	762.877	36.3118	42.8596	0.72926	113.137	4.1984	36.6532	11.5859	4.46907	9.79231	9.77249	2.50068	22.9669	0.175535	1.03014	12.8904	20.6338	2.46185	9.2245	1.73984	0.383623	1.76617	0.259496	1.39737	0.305277	0.819101	0.136499	0.831815	0.143882	1.11701	0.200893	0.371859	0.980082	2.22941
Innes-1	64.23	2.23444	1.18291	31.5226	0.090394	1.20287	0.00910891	1.34011	30.0987	0.0555645	0.296017	0.0514475	38.1967	31.7298	2.402	882.74	68.0833	36.2848	0.977475	220.623	6.06762	66.131	16.4083	4.52192	12.031	10.2511	3.75823	38.8526	0.398592	1.23719	11.2416	19.0011	2.24433	7.86852	1.68666	0.379476	1.82484	0.264468	1.62021	0.353479	0.887117	0.139578	0.912025	0.138886	0.772329	0.164733	0.465327	1.55031	0.942833
Innes-1	65.49	1.29968	0.688051	6.81275	0.0355507	0.355534	0.0417938	0.943983	45.644	0.0338125	0.0751656	0.0489276	24.0773	11.2879	0.708756	540.676	18.2105	17.3139	0.486173	69.6687	2.14175	18.6202	5.04101	1.14141	3.18085	4.94469	1.18154	8.50251	0.045581	0.40488	5.66178	9.32829	1.0876	4.31109	0.933131	0.194922	0.928371	0.128257	0.698173	0.143601	0.353681	0.0554206	0.319853	0.0479605	0.454311	0.0833708	0.176884	0.389487	1.49478
Innes-1	65.85	6.27149	3.32013	26.6016	0.307817	3.10145	0.0157531	0.87145	27.9894	0.0525494	0.52637	0.128514	137.837	38.8248	4.2589	1157.07	120.609	74.399	1.27903	319.63	10.9418	86.6221	23.5295	9.43516	21.2192	11.3002	6.78233	66.4814	0.315188	2.41698	15.8782	29.6185	3.74461	13.6506	2.51544	0.57025	2.48149	0.360909	1.90745	0.399672	1.03578	0.160104	1.00709	0.14588	1.92984	0.374666	0.80603	2.05054	1.10783
Innes-1	66.85	10.0001	5.29405	32.7226	0.403738	3.32481	0.0159674	1.63558	21.1509	0.0748398	0.716607	0.21083	182.192	47.4027	6.47554	1473.85	147.731	144.73	1.42672	427.721	9.67233	66.0514	26.1348	13.1928	26.3463	14.2876	11.19	52.205	0.291913	2.86389	20.0151	39.675	5.07007	19.4922	3.57098	0.735105	3.24004	0.46431	2.49318	0.519172	1.30298	0.202182	1.32595	0.212825	3.76683	0.707145	0.913568	2.53039	4.16713
Innes-1	68.15	5.88148	3.11366	30.2318	0.324508	2.54304	0.0131811	1.3525	26.1112	0.054057	0.575566	0.175446	125.82	51.7023	5.65513	1491.83	133.325	74.2806	1.36621	485.249	9.20326	91.3394	26.3493	9.08552	23.5746	15.9561	8.31122	67.8104	0.25409	2.71321	18.5262	33.2845	4.37481	17.3231	3.21579	0.751694	3.43353	0.480218	2.69456	0.573398	1.43416	0.216551	1.38933	0.207829	1.74515	0.440961	1.08744	1.97417	1.45353
Innes-1	69.1	4.02136	2.12891	22.7697	0.14307	1.27459	0.0128596	0.489339	33.566	0.0441501	0.353975	0.0968053	47.4035	31.2711	2.68498	935.988	73.4382	46.5182	1.10774	273.306	5.51446	59.702	18.1043	5.75277	15.8179	10.1711	4.7281	44.2932	0.298701	1.73637	12.3208	22.597	2.90096	11.0274	2.06292	0.418875	2.12949	0.283358	1.59057	0.357495	0.910436	0.139578	0.821912	0.131892	1.22071	0.2923	0.457286	1.28938	2.3669
Innes-1	69.27	3.74324	1.98167	12.3025	0.045739	0.466293	0.0250763	0.659187	41.6373	0.0335972	0.122144	0.0951253	42.6499	14.0085	2.31316	958.68	16.3627	23.2322	0.60105	193.877	2.09616	27.6566	8.80388	1.67501	5.35252	12.2493	1.60201	21.5963	0.35786	0.640633	17.2871	35.0474	4.12985	14.3165	2.7111	0.330745	2.44752	0.367869	2.17834	0.435823	1.21068	0.198077	1.30714	0.207829	0.961955	0.210938	0.18995	0.568957	2.90118
Innes-1	70.08	4.31099	2.28224	28.9512	0.19076	1.48361	0.0118952	0.683587	29.5786	0.0498573	0.489421	0.0689816	51.7153	31.5271	3.59094	771.752	77.7201	58.3118	1.25646	261.094	6.48503	59.2243	29.0159	6.09835	23.8285	10.321	5.72876	56.6384	0.373376	2.69476	11.3116	18.28	2.34191	8.81993	1.85422	0.404359	1.8166	0.28137	1.65497	0.336407	0.909465	0.144709	0.872415	0.143882	1.31355	0.343528	0.686432	1.09336	1.51246
Innes-1	70.85	4.14684	2.19534	23.4251	0.178946	1.42316	0.010502	0.546527	29.1837	0.0460884	0.412461	0.146783	57.3525	35.9761	3.16867	1248.06	92.7217	54.5994	1.07697	385.131	6.05648	70.0322	23.4375	6.5791	19.6252	10.5408	6.36475	46.4632	0.188143	2.2417	16.6176	29.5985	3.66838	13.4387	2.3549	0.443759	2.24271	0.317162	1.73572	0.346449	0.962905	0.14163	0.938762	0.144881	1.3738	0.340514	0.567839	1.28811	1.92299
Innes-1	71.25	4.46261	2.36251	26.1781	0.21894	1.89447	0.012431	0.688162	31.0522	0.049642	0.45226	0.114864	64.8717	42.1749	3.58436	966.094	103.223	66.3716	1.15287	359.092	8.42213	82.293	19.7901	6.87385	20.671	10.5508	6.33877	49.5054	0.143532	2.43441	12.6106	22.1263	2.79016	10.4927	2.1743	0.523594	2.2108	0.30722	1.77661	0.365529	0.936671	0.138551	0.900142	0.137887	1.4933	0.306363	0.678392	1.63559	2.15182
Innes-1	71.62	2.28881	1.2117	14.4705	0.0739193	0.580125	0.0232545	0.581983	40.8957	0.0366123	0.162155	0.0593221	86.6517	24.4002	1.59147	617.064	38.3882	26.5465	0.588741	151.993	2.68479	34.5334	11.1364	2.00636	6.74141	7.13079	2.111	12.4802	0.180384	0.755435	10.2424	16.2967	1.91296	6.62352	1.22511	0.290309	1.29375	0.190894	1.00279	0.229962	0.631573	0.0995518	0.701101	0.111908	0.672578	0.118527	0.258291	0.519316	1.96227
Innes-1	72.03	7.47602	3.9578	31.9259	0.265871	2.39755	0.0118952	0.821887	23.9248	0.0541647	0.556035	0.184686	61.4876	47.3494	4.22161	1228.96	126.669	87.9251	1.33646	434.281	9.31673	83.9948	30.1193	8.8426	26.6001	11.54	9.74677	75.4625	0.424776	3.00944	21.7438	42.099	4.94809	17.9587	2.97699	0.634533	2.87775	0.35892	1.98105	0.417747	1.10379	0.158051	1.02888	0.155872	2.34069	0.475113	0.580905	1.75524	2.0104
Innes-1	73.05	7.49379	3.96721	40.6284	0.281154	2.26947	0.0115737	0.952657	20.0433	0.0542723	0.589712	0.0710815	50.7522	41.3747	4.16677	621.895	92.7217	95.8449	1.3498	242.523	8.69872	65.4045	32.4284	9.90067	27.189	12.4791	8.28043	59.3172	0.331675	3.05864	13.48	25.2113	3.13982	10.6239	2.42413	0.527741	2.55354	0.375822	2.05772	0.466953	1.16404	0.191919	1.20019	0.183849	2.51748	0.494198	0.533668	1.37466	2.11254
Innes-1	73.43	1.42724	0.755581	8.52804	0.040428	0.346518	0.0323634	0.492007	44.0645	0.0275669	0.0804441	0.0342283	19.9863	14.0512	0.816572	416.768	14.6936	17.1524	0.535406	88.7234	2.26231	29.1394	6.37124	1.26337	3.93926	5.33735	1.75019	9.26773	0.125105	0.486881	5.91259	8.56303	0.999173	3.82177	0.70637	0.170038	0.861471	0.11732	0.743151	0.156655	0.445987	0.0626047	0.447596	0.0749384	0.514557	0.0954244	0.230151	0.301662	1.43193
Innes-1	74.63	1.5799	0.836399	23.9092	0.0599375	0.608199	0.0116808	0.638885	34.6159	0.0362892	0.153393	0.212615	77.4449	28.6038	2.90215	1679.43	72.7229	25.8255	0.870804	273.205	3.62801	59.3537	13.9971	3.83078	7.66328	12.5191	2.19952	26.1129	0.271547	0.850761	8.43272	14.7341	2.05527	8.67969	2.07496	0.508041	2.34872	0.371846	1.97696	0.430802	1.09019	0.159078	1.05561	0.170859	0.687393	0.130581	0.294472	0.907531	0.959529
Innes-1	75.4	3.91367	2.0719	23.3949	0.195854	1.88423	0.0106092	0.372675	30.7247	0.0460884	0.190342	0.286531	71.3748	32.466	6.25837	1738.97	115.741	75.2276	0.86465	453.154	8.3117	118.429	26.3085	10.3367	9.36488	17.9843	4.05651	73.8947	0.283184	1.05576	24.0421	44.3928	5.30182	18.6447	3.30409	0.728884	3.9111	0.570693	3.16478	0.628629	1.55075	0.242208	1.4022	0.239803	1.75601	0.167746	0.780905	2.73659	1.40148
Innes-1	76.12	2.0431	1.08162	8.26283	0.0484486	0.333095	0.0125381	0.449498	43.6888	0.0298283	0.0327266	0.219859	62.7688	15.6195	2.25065	1638.99	13.6604	26.1914	0.476942	174.803	1.83376	26.4822	3.53402	0.704359	1.72596	7.13678	1.0911	6.3813	0.0329735	0.329029	9.50392	16.5471	2.13353	8.94705	1.72278	0.344224	1.49136	0.202825	1.1183	0.235987	0.591735	0.090315	0.637725	0.107911	0.720972	0.0914065	0.174874	0.281296	1.41916
Innes-1	76.88	4.20434	2.22578	18.1714	0.143503	1.54714	0.0116808	0.429577	35.579	0.0368277	0.135657	0.230884	77.8425	37.5765	2.67621	1508.68	92.9105	51.7586	0.756953	315.593	5.63502	59.1845	18.6969	10.7026	6.84801	8.46962	3.59563	29.2692	0.239543	0.834361	12.6706	24.4901	3.05952	11.5622	2.087	0.429243	1.77337	0.237623	1.36364	0.279168	0.725823	0.110841	0.721896	0.112907	1.57824	0.281251	0.522613	1.90543	2.89234
Innes-1	77.73	4.65918	2.46657	24.2218	0.223275	2.99489	0.0106092	0.319681	28.1531	0.0418888	0.284088	0.421134	109.032	55.8526	4.40039	2516.34	158.262	74.6572	1.00414	630.985	12.5932	107.382	23.7338	11.2006	15.9296	13.4883	3.84675	91.4314	0.178445	1.88705	15.6683	28.7671	3.70395	13.7313	2.65591	0.54433	2.59162	0.384771	2.1211	0.441848	1.19707	0.182683	1.16157	0.175855	1.82416	0.289287	0.716583	3.59576	2.01629
Innes-1	79.65	3.86975	2.04865	34.8604	0.129521	1.20185	0.018968	9.02903	18.1652	0.0407043	0.219268	0.180381	70.2791	32.1033	1.98851	1391.85	56.5192	50.8655	0.810289	173.894	4.08595	44.0575	10.4927	8.73588	13.7569	8.48461	3.62064	24.6177	0.479086	1.9096	11.1117	20.4235	2.69258	10.9972	2.11108	0.435464	1.7003	0.230664	1.37079	0.291218	0.801611	0.13342	0.904103	0.126896	1.39158	0.332479	0.326633	1.25247	3.06323
Innes-1	79.95	1.00116	0.530014	4.31091	0.0108386	0.211784	0.0166104	0.528608	48.9573	0.0251979	0.0149909	0.0657268	39.2923	7.86098	2.58298	677.838	5.42441	14.6775	0.223599	67.1052	1.31301	15.764	2.85153	0.477704	0.704599	6.63522	0.640805	4.95573	0.0940715	0.175277	4.94032	7.6265	0.90261	3.43132	0.774599	0.17937	1.22376	0.204813	1.20621	0.240004	0.593678	0.0821046	0.515923	0.0869285	0.472089	0.0532368	0.101508	0.30548	1.55273
Innes-1	80.4	4.84529	2.5651	34.0537	0.192711	2.0789	0.0204683	9.16056	17.7221	0.0417811	0.381001	0.0267737	97.281	38.9955	3.13686	373.406	26.6353	96.5444	0.793878	102.439	5.65325	33.1003	8.93159	9.46565	25.1788	9.42979	5.87501	14.6294	0.461629	3.20112	10.712	18.3701	2.1254	7.41653	1.33949	0.25091	1.35653	0.229669	1.49448	0.365529	1.06882	0.18063	1.16157	0.189844	2.2202	0.382702	0.545729	1.087	4.8497
Innes-1	80.51	24.8747	13.1687	36.131	0.967238	6.81355	0.0312918	1.30579	5.22802	0.0225058	0.132701	0.219019	30.4655	34.2051	3.73243	1062.25	69.961	376.837	0.95491	246.964	10.4656	40.4946	24.827	38.9888	8.18208	20.642	16.9727	57.7079	0.7613	1.13469	15.9581	36.4798	4.61063	15.5877	2.63584	0.454127	2.6719	0.496125	3.30993	0.751142	2.23577	0.35305	2.25184	0.339721	13.6787	1.80503	1.1005	2.86388	7.11643
Innes-1	80.6	6.54543	3.46515	12.5949	0.142419	1.29816	0.0285055	12.7815	24.0212	0.02789	0.0483509	0.282331	143.05	23.7067	2.30329	1931.06	35.5766	44.3984	0.571305	107.889	4.20651	22.3721	7.28974	3.84806	2.5463	6.78109	2.87304	9.09434	0.226935	0.264454	13.5299	25.3415	3.30042	12.6417	2.12112	0.395028	1.68692	0.21575	1.04164	0.208874	0.597565	0.0872361	0.54068	0.0789351	1.58021	0.27422	0.244221	0.747154	4.19954
Innes-1	80.64	11.2506	5.95607	22.2352	0.730523	5.27461	0.0206826	2.39904	21.3436	0.0417811	0.278704	0.109195	37.2336	52.0544	4.83253	649.417	141.074	160.226	1.11286	109.201	10.415	56.9353	34.5433	43.3796	15.4626	11.2402	17.9348	34.9071	0.882526	1.5816	13.6398	21.6655	2.55028	8.93091	1.49301	0.304825	1.72912	0.292306	1.77763	0.424777	1.2097	0.193972	1.29327	0.20683	4.66064	1.37612	1.39799	0.953353	7.46704
Innes-1	80.73	0.564099	0.298634	3.13209	0.0140902	0.132992	0.0152172	0.418711	49.3907	0.0292898	0.0121405	0.0592171	13.068	6.58495	1.60463	617.851	1.28954	5.9205	0.258472	21.8806	1.26641	11.604	2.17415	0.362852	0.698508	5.99178	0.792827	0.375859	0.2056	0.153752	3.43744	5.14744	0.787751	3.09131	0.632121	0.183517	0.989096	0.170015	1.03857	0.213895	0.531493	0.0779993	0.492157	0.0789351	0.217279	0.0200893	0.122613	0.0127283	0.457667
Innes-1	81.2	0.150043	0.0794328	1.06084	0.0105135	0.140267	0.0133955	0.382778	50.6428	0.0227212	0.0134073	0.0162742	54.2865	7.25497	0.208722	336.111	1.46936	3.55101	0.14257	13.5744	1.10836	13.057	2.33456	0.231737	0.977708	3.54092	0.531117	0.265801	0.0717659	0.191678	1.0762	1.44437	0.23785	0.897933	0.248835	0.0829455	0.442572	0.0904758	0.51213	0.109458	0.281779	0.0431049	0.215876	0.0339721	0.103701	0.0190849	0.129648	0.022911	0.761141
Iona-1	7.91	2.9007	1.53563	8.36021	0.153258	1.38476	0.0132943	0.471587	42.1075	0.1176	0.926841	0.11408	92.7967	47.8651	3.59812	1004.66	57.5004	25.341	0.363193	181.831	5.9378	67.1857	21.0287	3.51724	18.1964	9.50197	1.37207	12.3382	0.320907	0.807707	7.92635	10.5722	1.45086	6.00942	1.1751	0.317027	1.29484	0.199	1.2587	0.283351	0.674217	0.121059	0.644018	0.0881275	0.744486	0.111543	0.183877	0.143657	0.583384
Iona-1	8.78	1.20871	0.639892	3.81269	0.0664257	0.312711	0.0180499	0.417518	50.2825	0.0881736	0.377324	0.0878871	74.6059	10.9758	1.5138	855.091	14.0226	9.59381	0.210003	18.9845	1.78074	11.9462	5.5583	1.23124	7.91758	4.06136	0.698713	0.540053	0.200147	0.413505	3.1295	3.99496	0.584602	2.41173	0.446073	0.137175	0.527491	0.0868185	0.498385	0.106257	0.293864	0.0507	0.278494	0.0373584	0.326475	0.0485419	0.14646	0.0972677	0.858598
Iona-1	10.79	0.862207	0.456452	2.58421	0.0394598	0.403093	0.0224814	0.41329	51.5258	0.0675753	0.249439	0.0590965	36.3816	5.04365	1.23423	763.586	15.014	7.52046	0.180582	12.3725	1.94227	11.6508	6.21516	0.846667	5.58064	3.9145	0.509824	1.61606	0.0167721	0.341371	2.68355	3.46432	0.49846	2.04957	0.430969	0.102627	0.428177	0.0731617	0.437233	0.100185	0.26438	0.0486306	0.238848	0.0383163	0.253247	0.0402794	0.133631	0.0583606	0.798924
Iona-1	12.84	1.55168	0.82146	4.78356	0.0548689	0.800174	0.0154559	0.42784	46.5421	0.0860718	0.597367	0.1932	120.734	16.8819	1.2363	1130.97	46.7714	12.2967	0.258699	165	3.19583	72.8788	18.5863	1.99936	9.83662	4.07327	0.807149	47.4263	0.346624	0.383026	3.08313	4.40813	0.582666	2.46645	0.516559	0.131079	0.508752	0.0848675	0.496346	0.109292	0.283053	0.0507	0.259154	0.0383163	0.404789	0.0784933	0.161427	0.317242	0.872849
Iona-1	14.15	2.72402	1.44209	8.20318	0.146803	1.62833	0.0174014	0.627898	43.7757	0.135361	0.849166	0.145685	66.0282	42.304	3.34444	1065.98	48.7542	25.0682	0.372324	92.2177	6.8911	56.1358	20.1683	3.10512	19.0687	8.8828	1.57145	5.37696	0.185611	0.979408	7.54454	10.7849	1.60959	6.44918	1.34325	0.312963	1.29671	0.227289	1.19959	0.264123	0.678149	0.0982959	0.554088	0.0881275	0.822799	0.12497	0.239467	1.05797	1.38498
Iona-1	15.84	0.743207	0.393454	2.23527	0.0338376	0.364535	0.0216167	0.408965	51.5776	0.0630562	0.248152	0.0475153	41.1786	5.91649	0.986039	850.898	12.139	5.91492	0.220148	11.6913	1.66976	8.11586	6.13097	0.786482	5.08972	3.84008	0.453857	0.174211	0.131941	0.297683	2.98841	3.24964	0.525561	2.16399	0.400761	0.119901	0.443167	0.0731617	0.457617	0.0951249	0.26438	0.0486306	0.23498	0.0364005	0.243077	0.0289186	0.107974	0.070332	0.445331
Iona-1	17.78	2.04015	1.08006	5.64873	0.085583	0.534624	0.0322089	0.586904	48.1895	0.0910112	0.558529	0.0790118	36.391	9.1068	2.14127	791.363	26.1946	18.6319	0.318555	25.1758	2.95304	10.887	6.46957	1.95549	12.1208	9.16658	1.46126	0.312554	0.329852	0.581143	7.42121	9.73981	1.47699	6.05618	1.17207	0.266222	1.17772	0.194122	1.20468	0.271207	0.681097	0.104504	0.610173	0.10058	0.611252	0.113609	0.169979	0.128693	1.116
Iona-1	18.67	7.86338	4.16287	22.014	0.392516	6.05313	0.0152398	1.19937	27.5813	0.222799	2.45684	0.152504	115.034	97.873	7.79057	621.56	47.8729	66.7071	0.738561	133.342	11.7626	35.4413	15.7368	8.4075	51.6174	13.0483	4.04187	3.26184	0.538944	2.3835	15.2233	21.0634	3.58504	14.6057	2.96342	0.621862	2.60841	0.406779	2.20043	0.461457	1.16563	0.177967	1.0927	0.161886	2.17345	0.32017	0.560182	0.51477	1.45801
Iona-1	20.65	1.84165	0.974968	5.41576	0.0895394	0.73529	0.0211844	0.579432	48.3346	0.109613	0.606808	0.116786	37.303	14.3417	1.95489	864	17.856	17.0961	0.231308	24.6248	3.13934	14.0034	7.49279	1.81472	12.9322	5.32154	1.03277	0.301282	0.0771517	0.626862	4.12991	5.84206	0.829476	3.28727	0.675655	0.166643	0.695201	0.120961	0.624765	0.152807	0.38625	0.064151	0.364557	0.0546007	0.564467	0.0836573	0.183877	0.215485	0.953009
Iona-1	21.93	0.836328	0.442752	2.56574	0.0372734	0.335306	0.0224814	0.466967	50.1996	0.0711485	0.277333	0.0454588	47.904	6.40466	1.02186	849.117	12.5465	7.57502	0.207974	13.3042	1.81741	8.54462	8.19683	0.915012	5.93362	5.11316	0.500205	0.168062	0.145358	0.322067	4.00856	4.46585	0.691069	2.80572	0.587044	0.158514	0.572464	0.103402	0.557498	0.134592	0.322366	0.0631163	0.311372	0.0498112	0.257316	0.037181	0.184946	0.0478856	0.888881
Iona-1	24.87	0.807747	0.427621	2.51237	0.0348787	0.347848	0.0192389	0.437671	50.7073	0.06726	0.259202	0.0613694	29.8367	5.67084	0.881564	944.395	9.26506	7.80539	0.177539	11.2705	1.73318	8.12706	4.52491	0.905831	5.68512	3.62476	0.467849	0.0942787	0.117405	0.365754	2.8345	3.65167	0.520721	2.04261	0.414858	0.105676	0.391636	0.0780391	0.436214	0.101197	0.254551	0.0496653	0.230145	0.0354426	0.248162	0.0309842	0.105836	0.059857	0.678685
Iona-1	25.93	7.00387	3.70785	19.8383	0.360552	2.11238	0.0209682	1.40385	32.7515	0.250649	2.13713	0.220908	104.3	73.9666	6.92909	553.22	105.318	63.7668	0.701024	102.486	8.97012	29.4631	20.6401	6.5989	48.4021	15.1619	4.5823	0.849533	0.495337	2.17624	18.0844	25.6407	4.09124	16.4563	3.39539	0.725505	2.97569	0.470186	2.59079	0.538366	1.32583	0.213147	1.24549	0.185834	2.10124	0.396598	0.516351	0.345674	2.96501
Iona-1	28.44	7.91015	4.18763	22.5477	0.427394	3.80186	0.0134024	1.32324	26.9078	0.297415	2.5255	1.53694	156.26	87.4303	6.5201	646.192	385.429	67.869	0.827837	131.539	14.2995	48.1411	19.2709	10.9047	53.7576	25.1044	4.15467	1.57814	0.637341	2.47595	23.6094	40.8002	6.82164	29.7088	6.31752	1.36667	5.52976	0.849651	4.3336	0.847016	1.92634	0.248326	1.30157	0.197329	2.18769	0.33876	0.458622	0.350164	2.14115
Iona-1	29.73	0.797562	0.422229	2.65195	0.0380022	0.326392	0.019455	0.449959	49.5157	0.0649479	0.259309	0.0567153	66.8642	6.57504	0.961085	873.329	8.79139	6.41608	0.179568	12.1421	1.60138	7.79709	5.51574	0.869108	5.90116	4.42949	0.543055	0.380189	0.181139	0.332227	3.41956	3.98686	0.753013	2.88134	0.561871	0.148353	0.520933	0.087794	0.520807	0.103221	0.294847	0.0558735	0.250452	0.04119	0.272571	0.0402794	0.172117	0.0433963	0.548648
Iona-1	31.42	0.983078	0.520442	3.27901	0.0470602	0.42175	0.0146994	0.451139	48.6868	0.0827088	0.353399	0.0860471	65.5723	8.14929	1.1369	889.68	11.5772	7.74679	0.227249	19.235	2.3773	11.7527	6.2022	1.09557	7.56866	2.9907	0.584155	0.324852	0.0782699	0.429761	2.39349	3.61724	0.494589	2.01375	0.423921	0.101611	0.406627	0.0692597	0.361813	0.0850052	0.214256	0.0393184	0.18663	0.0287372	0.288844	0.0413122	0.116526	0.139168	0.629698
Iona-1	35.03	5.70058	3.01789	17.6933	0.329005	2.25023	0.0152398	1.32029	34.4092	0.256849	1.90325	0.208028	187.037	53.9174	5.07153	599.025	78.3195	77.9832	0.628994	83.071	10.2266	37.8041	23.7393	6.36326	42.8336	12.4827	10.2402	1.69292	0.781581	2.08683	14.8385	22.866	3.16885	12.6258	2.50224	0.528379	2.23551	0.346299	1.93646	0.413894	1.08897	0.175898	1.03082	0.142728	2.48264	0.748785	0.505661	0.51477	3.54484
Iona-1	37.89	2.89238	1.53123	9.09914	0.143575	1.10076	0.0124296	0.854893	41.8071	0.133259	0.901951	0.200993	73.2096	22.2548	3.56809	712.646	29.5874	25.3814	0.342903	39.8925	5.28773	21.0917	15.154	2.93273	20.1134	8.27652	1.71749	0.846459	0.22251	0.946897	6.40304	10.1975	1.43247	5.74178	1.2627	0.297721	1.17959	0.185343	1.14965	0.24692	0.653578	0.103469	0.592768	0.092917	0.895011	0.121871	0.245881	0.327717	1.86505
Iona-1	40.35	0.808787	0.428172	2.73405	0.0313388	0.302242	0.0131862	0.444356	50.3032	0.0640021	0.246864	0.0506541	134.317	4.20844	0.908175	841.57	8.28248	6.52015	0.251598	14.8971	1.6321	8.8695	4.81818	0.88645	5.30577	3.51363	0.504577	0.168062	0.486391	0.300731	2.7615	3.6861	0.563308	2.20876	0.413851	0.123966	0.447852	0.0770636	0.42908	0.0961369	0.244723	0.0444918	0.211772	0.0335268	0.25935	0.0330498	0.0898002	0.0673391	1.41793
Iona-1	41.69	1.35006	0.71472	4.42026	0.0525784	0.448388	0.0144832	0.547678	49.3914	0.0893297	0.393631	0.0528188	43.0119	7.81061	1.08513	969.655	7.25474	11.2862	0.316526	17.2213	1.99776	9.53249	5.05409	1.47606	8.09203	4.17448	0.858743	0.275663	0.374577	0.391154	4.24929	6.16308	0.769468	2.99576	0.546767	0.144288	0.620247	0.0907205	0.482078	0.110304	0.276174	0.0486306	0.241749	0.0431058	0.363089	0.069198	0.150736	0.0837998	1.53728
Iona-1	41.89	2.95578	1.56479	9.15251	0.127542	1.13496	0.0144832	0.813505	44.5838	0.156379	0.711089	0.111049	51.3901	19.7565	2.77495	856.139	36.3178	26.8667	0.449426	38.1293	4.57028	26.5606	14.6174	3.06738	15.5897	8.00861	1.92911	1.30658	0.241519	0.709157	7.8415	12.395	1.55442	5.85521	1.17812	0.308899	1.17585	0.195098	1.07117	0.245908	0.629008	0.112782	0.668193	0.101538	0.813646	0.146658	0.295058	0.279832	1.99419
Iona-1	42.53	3.34448	1.77057	10.889	0.125459	1.10387	0.00994368	0.82314	41.2579	0.164892	0.888218	0.127718	135.552	25.7775	2.2562	1015.77	82.6376	31.363	0.410875	151.976	4.72784	49.3938	19.0951	4.91475	17.9936	7.73871	2.2378	8.6429	0.238164	0.792467	13.033	21.4482	2.29195	8.1943	1.45301	0.352591	1.33981	0.206804	1.0885	0.223645	0.618196	0.0941571	0.576329	0.0795063	0.88484	0.172479	0.298265	0.779638	0.980619
Iona-1	43.23	1.42385	0.753785	4.80204	0.0510166	0.517211	0.0159964	0.544631	48.4382	0.075142	0.371852	0.03864	53.233	8.0573	1.45374	911.377	13.7913	11.8824	0.31957	24.204	2.88467	15.032	7.88875	1.57704	8.41052	5.76905	0.775667	0.436551	0.508754	0.390138	5.20629	7.12612	0.950462	3.59968	0.702842	0.183917	0.776714	0.121936	0.7063	0.160903	0.447185	0.0807061	0.431279	0.0708851	0.371226	0.0537059	0.189222	0.128693	1.65574
Iona-1	44.18	1.26795	0.671253	4.35457	0.0488302	0.577224	0.0101598	0.502653	47.7233	0.112135	0.357047	0.125228	55.5317	10.0037	1.60802	1285.05	18.605	11.3065	0.289134	66.541	2.68449	24.87	10.1581	1.38425	7.22177	5.21338	0.768672	5.0726	0.0603796	0.334259	4.81659	7.00156	0.870127	3.51213	0.675655	0.192045	0.6774	0.118034	0.61763	0.144711	0.383301	0.0610469	0.3926	0.0593903	0.364107	0.0568043	0.19136	0.436956	1.02248
Iona-1	44.6	0.45085	0.23868	1.44708	0.0179079	0.190197	0.0114568	0.628587	50.4171	0.0463463	0.0831464	0.0369082	22.2659	4.89208	0.706059	316.86	16.8315	4.10831	0.158263	50.2514	1.24563	10.6833	4.97453	0.537582	2.04076	2.46083	0.3393	1.32605	0.0704429	0.166621	1.98603	3.01977	0.393929	1.58891	0.262811	0.0792569	0.280142	0.0575538	0.276201	0.0647659	0.171011	0.0341449	0.158587	0.0239477	0.146456	0.0227217	0.131493	0.157125	0.279668
Iona-1	45.72	9.7362	5.15435	30.9428	0.53203	4.15013	0.0217248	1.89933	17.2305	0.668922	1.30888	0.360099	106.865	56.1231	5.60581	636.235	136.591	91.4822	1.2306	292.332	13.368	139.321	30.2246	11.6493	40.9572	11.1134	7.56254	81.92	0.235928	2.53183	11.1289	22.8558	2.77976	11.4119	2.40658	0.545653	2.13526	0.349225	1.88347	0.386571	0.958254	0.148996	0.821945	0.12836	2.64842	0.553584	2.5144	2.89109	0.612776
Iona-1	46.65	5.29318	2.80221	23.3585	0.298291	3.10741	0.0198874	0.915648	28.7728	0.695931	0.617322	0.274052	68.954	36.3875	2.67451	752.057	106.321	72.4765	0.88465	423.771	8.57175	59.0383	17.106	5.49313	19.5049	7.43507	4.15467	42.7533	0.285126	1.20191	8.99681	17.9748	2.28033	9.36734	1.86283	0.400349	1.56561	0.238995	1.23016	0.245908	0.602471	0.0900183	0.549253	0.0814221	2.07683	0.271628	1.2123	2.03065	0.963697
Iona-1	47.59	4.42952	2.34499	20.6901	0.115985	1.16502	0.0214005	1.02438	34.9687	0.562251	0.333658	0.11224	62.9505	16.516	2.44258	987.579	87.5945	40.5375	0.672618	163.698	3.72301	33.0786	13.4887	5.1412	9.63072	8.57023	2.52813	16.468	0.201265	0.598414	10.8723	16.4457	1.89124	7.2511	1.53054	0.381043	1.38197	0.215583	1.15067	0.242872	0.645716	0.105539	0.656589	0.109201	1.21538	0.218955	0.482141	1.12382	0.893334
Iona-1	48.7	1.7585	0.930952	16.041	0.0645516	0.736948	0.00994368	0.543746	39.2893	0.28575	0.234741	0.339101	50.2977	8.84756	2.17129	1241.02	28.596	15.7421	0.610733	44.9618	3.57933	30.2066	10.9723	2.64405	7.55142	19.4782	1.48138	23.6722	0.131941	0.561839	22.9582	30.1774	3.25015	12.8148	2.34012	0.541589	2.48848	0.376539	2.29114	0.508007	1.34549	0.215216	1.377	0.238519	0.510563	0.0898541	0.39341	0.954719	0.781111
Iona-1	49.88	5.83362	3.08832	20.177	0.272575	2.14036	0.0135104	1.04699	31.819	0.641387	1.12114	0.194607	110.665	63.0849	4.69774	903.307	68.0972	62.2815	1.05306	207.477	6.97136	39.9835	24.3684	6.56932	36.9811	10.7562	5.58271	8.53632	0.296307	2.16506	11.6024	20.1115	2.52811	10.0887	2.04308	0.500944	1.85887	0.28972	1.73365	0.361272	0.921889	0.140718	0.845153	0.140812	1.81952	0.347023	1.42077	0.878402	0.522819
Iona-1	50.63	4.3287	2.29162	16.5234	0.174185	1.45524	0.0127538	0.950155	36.3571	0.394101	0.846269	0.130315	77.7026	34.7359	4.00193	1003.41	39.4131	43.0029	0.855229	91.7568	4.52866	33.2924	16.2271	5.77365	32.143	11.2623	6.31727	5.25809	0.669767	2.06854	13.8321	22.5217	2.53295	9.49867	1.81853	0.383075	1.66961	0.279965	1.49312	0.339009	0.996584	0.162447	1.02405	0.150391	1.23776	0.399696	0.564458	0.641967	1.8793
Iona-1	51.54	3.34968	1.77332	11.7921	0.129207	1.08314	0.01297	0.815078	38.0771	0.28575	0.694353	0.105313	95.181	23.3001	3.20879	925.108	48.8533	28.7057	0.655371	67.5628	3.66752	22.7924	12.1195	3.68351	24.5966	8.56229	3.86959	3.10812	0.456202	1.38377	9.22275	16.6381	2.00158	7.69584	1.59499	0.366817	1.40071	0.232166	1.34024	0.295494	0.750878	0.11692	0.689467	0.115907	1.01909	0.274726	0.388065	0.389071	1.98529
Iona-1	53.75	4.25803	2.2542	14.7171	0.180016	1.73509	0.0176176	0.824123	37.559	0.252961	1.02211	0.13432	142.581	28.0668	3.20983	926.681	34.6545	38.3955	0.710155	71.9709	7.31027	35.0747	16.0421	4.70869	32.6197	7.07984	4.46949	3.05893	0.597087	1.7922	9.04022	15.3824	1.92318	7.2312	1.45804	0.33735	1.31826	0.206804	1.09971	0.228705	0.62999	0.0982959	0.563758	0.0919591	1.2042	0.348056	0.455415	0.516267	2.06188
Iona-1	54.76	2.85913	1.51362	9.32492	0.119525	0.989542	0.01297	0.716573	41.9728	0.170042	0.605198	0.0687294	143.721	21.4813	2.85054	1041.14	32.8259	24.8257	0.514355	63.2851	3.42474	22.273	10.9168	3.22957	20.7524	6.09353	3.29068	4.03451	0.304134	1.22426	7.08379	12.9013	1.52829	5.85421	1.2053	0.280447	1.10932	0.16876	0.993712	0.211501	0.50812	0.0889837	0.520243	0.072801	0.774998	0.23548	0.273677	0.49382	2.50187
Iona-1	55.16	5.46882	2.89519	16.8107	0.225098	1.67601	0.0166449	0.852927	35.0309	0.289218	1.12865	0.107586	958.459	54.691	5.20614	938.001	72.6025	46.0745	0.806533	135.546	5.61475	34.9423	17.5871	6.3602	40.521	11.0539	6.31028	2.21145	0.537826	2.39366	13.2994	25.8027	3.18434	12.1084	2.45189	0.733634	2.20647	0.347274	1.96296	0.411871	1.02509	0.171759	0.978598	0.14177	1.46863	0.482321	0.523834	0.719781	2.68891
Iona-1	55.82	4.5085	2.3868	14.1424	0.186575	1.67705	0.0153479	0.72257	37.3829	0.239719	0.92491	0.135078	257.806	33.2097	4.25768	1010.43	114.34	44.7408	0.6574	220.902	5.67024	37.0301	14.3861	5.4003	31.9401	11.679	5.9736	8.01881	0.306371	1.84604	14.2071	26.5014	3.06335	12.0487	2.38543	0.579185	1.99004	0.343372	1.88449	0.397703	1.07128	0.16762	1.04145	0.145602	1.37201	0.431713	0.422275	1.3797	1.82319
Iona-1	56.61	9.12925	4.83302	25.2879	0.381896	2.82859	0.0157802	0.977091	27.1357	0.40356	1.93114	0.158565	198.246	78.1479	7.10615	747.235	73.0652	78.357	1.1048	260.373	8.43401	35.1562	18.6233	9.53469	61.6183	12.6117	10.8873	9.17783	0.542299	3.37916	17.5023	34.5319	4.20836	16.3269	3.10841	0.71636	2.79767	0.395073	2.33293	0.480684	1.17644	0.18521	1.15556	0.172423	2.40127	0.800425	0.646775	1.06097	3.12712
Iona-1	57.09	5.78685	3.06356	16.2976	0.258311	2.40674	0.0157802	0.743116	33.9533	0.298781	1.42904	0.138974	180.958	45.8371	4.90172	922.593	88.685	45.1652	0.695952	166.803	8.07231	36.7144	17.7536	6.32246	36.3726	10.528	4.24212	11.9898	0.319788	1.74851	10.527	20.1621	2.54747	10.0091	2.05113	0.524315	1.90665	0.305328	1.70715	0.372404	0.979876	0.138649	0.868361	0.126444	1.52965	0.319137	0.42762	1.32434	1.05365
Iona-1	57.3	1.64522	0.870979	5.23206	0.067571	0.529027	0.0226975	0.496263	46.2209	0.111715	0.382259	0.0482729	193.212	14.8121	1.77265	991.038	13.3286	14.2973	0.294207	36.6066	2.0929	8.87561	6.53618	1.67803	10.5081	5.1985	1.41404	0.459096	0.107342	0.591303	4.98529	7.85321	1.04338	4.00064	0.758224	0.215416	0.761723	0.133642	0.699166	0.165963	0.42458	0.0724286	0.416775	0.0574744	0.45971	0.102248	0.164634	0.0718284	1.0492
Iona-1	58.44	5.8887	3.11748	15.0558	0.227388	1.86154	0.0153479	0.769758	34.7304	0.294368	1.26275	0.10488	298.842	44.4155	5.10259	893.768	206.869	58.5329	0.653342	128.434	5.5761	36.0829	16.9117	6.19903	32.3458	13.0583	7.42612	3.58874	0.574725	1.52194	14.3649	28.3343	3.40695	13.2824	2.50627	0.554798	2.33014	0.381416	2.19024	0.476636	1.23836	0.191418	1.13622	0.178171	2.02496	0.538092	0.327129	0.695838	2.26763
Iona-1	58.74	1.83957	0.973868	5.43116	0.0803772	0.868375	0.0208601	0.522708	43.9725	0.121699	0.424851	0.0592047	133.367	14.0177	1.72606	863.896	18.9465	20.3092	0.294207	41.0747	2.38622	12.3128	8.66958	1.90653	10.6907	5.32452	1.65715	1.96141	0.309725	0.515104	5.16387	8.54891	1.08597	4.30111	0.798501	0.229642	0.826371	0.12974	0.8072	0.159891	0.429494	0.0703592	0.381963	0.062264	0.616337	0.119806	0.186015	0.154132	1.36004
Iona-1	59.88	5.32851	2.82092	13.6497	0.170541	1.51743	0.0166449	0.765924	36.927	0.259266	1.15976	0.0652659	74.5394	32.4884	3.76585	880.247	34.6104	36.799	0.735517	80.0956	4.92603	28.0883	15.8941	5.52679	32.3661	8.72205	4.43189	2.76585	0.399176	1.52804	9.62232	17.8735	2.23194	8.56641	1.82155	0.393236	1.56092	0.25948	1.44318	0.296506	0.801985	0.126233	0.741685	0.109201	1.30895	0.366646	0.274746	0.522252	3.35156
Iona-1	60.35	4.83588	2.56012	11.9666	0.155028	1.5423	0.0179419	0.620722	38.3361	0.205668	1.0072	0.0746824	85.6629	21.2513	3.23882	1094.28	47.7738	36.5666	0.608704	68.5346	5.74357	31.1639	15.0892	5.5982	26.5745	8.64068	3.87222	9.58568	0.342151	1.22223	10.4086	19.6356	2.3626	8.87683	1.71783	0.398317	1.59746	0.24875	1.33922	0.285375	0.743998	0.127267	0.754256	0.114949	1.27132	0.32017	0.231984	0.89187	2.04763
Iona-1	60.93	6.41043	3.39368	17.8165	0.254667	2.80061	0.0191308	0.853222	29.9332	0.316122	1.23915	0.141896	87.2777	32.7498	4.79714	762.329	73.3956	64.8984	0.895809	77.6812	11.2374	44.3424	22.2591	8.72475	43.0973	11.2623	8.263	28.96	0.258291	2.51862	13.9801	26.6533	3.06238	11.5711	2.30991	0.492815	2.08748	0.334593	1.88347	0.397703	1.02705	0.165551	0.939919	0.149434	1.96089	0.619684	0.508868	1.35875	1.32887
Iona-1	61.14	4.32455	2.28941	12.4695	0.170125	2.03982	0.0193469	0.725912	36.181	0.250543	0.906242	0.139515	335.413	26.4465	3.66956	862.533	62.3692	43.498	0.59653	62.2231	7.22604	32.549	18.6788	5.21261	28.0148	9.18544	5.46465	15.7302	0.212447	1.61541	11.4544	20.9925	2.42164	9.34147	1.80443	0.425752	1.60777	0.263382	1.46967	0.316746	0.834418	0.123129	0.748454	0.127402	1.27742	0.368712	0.400894	0.790113	0.920945
Iona-1	61.63	1.55272	0.82201	4.18318	0.0473726	0.542294	0.0292906	0.5755	45.6925	0.0942691	0.282269	0.0374494	105.155	10.7981	1.66186	457.837	10.4382	12.7311	0.321599	39.051	2.33271	11.3147	6.81003	1.4985	8.9339	5.03577	1.23565	0.821864	0.314198	0.497832	5.22603	8.41423	0.967884	3.88026	0.741106	0.185949	0.691454	0.121936	0.700185	0.154831	0.436374	0.0724286	0.391633	0.0670535	0.429198	0.0898541	0.161427	0.10475	1.38587
Iona-1	62.49	3.50661	1.8564	10.1008	0.150031	1.2241	0.0195631	0.602436	40.0353	0.215232	0.941002	0.092433	137.832	37.1715	3.34444	1023.43	61.0143	27.9276	0.486963	101.985	4.91216	31.8463	17.2818	3.85488	23.3085	7.96495	2.28153	1.65705	0.428248	1.1125	7.71522	13.4887	1.73154	6.88994	1.4228	0.354624	1.35667	0.223387	1.2903	0.263111	0.714513	0.115886	0.650787	0.0967486	0.950949	0.182807	0.286505	0.511778	2.00132
Iona-1	63.27	2.48186	1.3139	6.58061	0.0813142	0.770738	0.0345867	0.536668	43.3198	0.14524	0.525485	0.0755482	231.398	13.4219	2.59168	772.077	17.1179	19.5312	0.324642	38.7304	2.63297	10.1629	7.32626	2.21663	12.6077	7.31501	1.37819	0.592316	0.281772	0.559807	6.83221	11.433	1.47796	5.92286	1.25968	0.345479	1.12806	0.192171	1.04263	0.25198	0.64375	0.108643	0.619843	0.103454	0.6499	0.114641	0.163565	0.131685	1.2211
Iona-1	63.9	3.1148	1.64897	8.1416	0.120253	1.13185	0.02594	0.588968	42.6152	0.167835	0.68341	0.102282	160.06	14.6031	2.71904	964.1	24.0026	23.401	0.412904	40.3534	3.99652	15.419	11.6106	2.97761	16.391	6.93199	1.91512	0.776774	0.368987	0.714237	6.68225	11.2507	1.47505	5.87411	1.28082	0.328205	1.15711	0.193147	1.09971	0.238824	0.601488	0.0972612	0.59857	0.0919591	0.788219	0.164216	0.204188	0.224464	1.82408
Iona-1	64.5	5.93131	3.14004	13.7113	0.223848	1.74753	0.0244269	0.632027	36.7923	0.239929	1.18658	0.129991	163.669	31.8613	3.77517	921.125	40.1622	62.8069	0.570153	88.2304	6.16076	27.4263	22.6292	4.97493	26.5339	9.93262	3.51018	5.36569	8.46657	1.07288	10.7441	19.6862	2.52908	10.0389	2.07429	0.50196	1.91134	0.305328	1.74384	0.3552	0.93958	0.147961	0.90414	0.147518	1.99547	0.288153	0.297196	0.51477	89.5116
Iona-1	65.12	4.14163	2.19258	10.5914	0.150863	1.85325	0.0257239	0.55338	38.2947	0.202095	0.892295	0.111591	307.201	20.5196	3.64885	1077.51	53.0281	35.0914	0.464644	61.4016	7.09127	29.9316	17.9294	5.20547	21.148	9.62303	2.61995	7.71753	0.412594	1.03427	9.93507	18.3596	2.27743	8.83007	1.84572	0.474525	1.66586	0.27021	1.54306	0.328889	0.886507	0.142788	0.800671	0.132191	1.07706	0.203463	0.24695	0.840991	1.6976
Iona-1	65.8	1.32407	0.700965	4.07029	0.0520578	0.549031	0.037613	0.465492	46.1795	0.110559	0.291817	0.0704612	154.835	20.4359	1.47859	896.179	8.13047	11.5793	0.27696	34.6029	2.16523	13.0257	9.01096	1.45769	7.39217	4.78075	0.85612	0.396585	0.0547889	0.38201	4.35979	6.80409	0.872063	3.39075	0.710898	0.195094	0.649292	0.118034	0.677763	0.132568	0.389198	0.0662204	0.379062	0.0584323	0.402755	0.064034	0.190291	0.0897855	0.639496
Iona-1	66.49	2.33012	1.23357	6.26348	0.0974522	0.787736	0.027237	0.587592	43.527	0.180341	0.480425	0.161162	178.678	20.2164	2.67244	802.893	19.343	19.7838	0.333773	40.3634	3.02538	13.4636	8.92492	2.08504	12.1918	7.48667	1.33971	0.547226	0.167721	0.593335	6.48394	10.2785	1.37246	5.61642	1.15093	0.30077	1.1468	0.183392	1.11296	0.235788	0.592643	0.0920877	0.607272	0.0938749	0.683463	0.096051	0.177462	0.218478	1.23713
Iona-1	67.53	4.4503	2.35599	11.905	0.214478	1.6076	0.0305876	0.786077	39.0614	0.267253	1.01074	0.352089	181.053	33.8474	4.26183	842.932	42.916	40.5274	0.556964	83.9927	6.83164	24.4932	13.8587	3.91507	24.4952	12.2347	2.68816	1.45722	0.506518	1.12165	12.4213	22.0356	2.88913	11.7602	2.52238	0.580201	2.2936	0.351176	1.90589	0.405799	1.03688	0.158308	0.906074	0.139854	1.26624	0.186938	0.412653	0.305271	1.85258
Iona-1	68.09	7.59732	4.02202	17.8268	0.333794	1.99525	0.0208601	0.999801	32.9483	0.415856	1.65542	0.109426	155.405	69.3672	6.91977	807.819	44.2158	61.2307	0.78117	150.874	6.20635	33.4961	17.5593	7.31703	46.1808	11.9866	4.90586	2.57832	0.570252	2.67102	13.2796	27.0584	3.07013	11.9492	2.46095	0.566991	2.19616	0.342397	2.0231	0.438182	1.14401	0.192453	1.18457	0.16955	2.01174	0.411057	0.469313	0.70332	2.39232
Iona-1	69.03	3.42763	1.81459	8.25655	0.145554	1.09143	0.023346	0.709298	41.0507	0.202726	0.750785	0.077713	66.8452	23.4046	3.5919	1090.09	27.7588	28.4733	0.422035	58.9271	3.36726	20.2973	11.7124	3.50398	19.8599	8.1892	2.20457	4.49054	0.264999	1.13181	8.21543	15.8178	1.80801	7.14863	1.45502	0.334301	1.30421	0.22046	1.25361	0.272219	0.77938	0.11692	0.758124	0.110159	0.904164	0.140462	0.212741	0.347171	1.2968
Iona-1	69.86	7.75945	4.10785	19.5304	0.308703	2.40881	0.0229137	1.12269	31.5807	0.354586	1.80454	0.114513	151.796	38.0286	5.56647	825.428	66.2356	80.9538	0.679719	77.4208	5.4889	23.8516	16.5879	6.49077	40.7949	9.92269	4.00077	4.29583	0.426012	1.83182	11.2867	23.3318	2.90849	11.6408	2.4247	0.485702	2.00315	0.330691	1.66842	0.37038	0.972996	0.1521	0.872229	0.140812	2.50501	0.347023	0.411584	0.395056	2.04051
Iona-1	70.45	4.67375	2.47428	13.5984	0.203546	2.045	0.019455	0.677741	34.3056	0.297205	1.27134	0.290937	84.599	23.5928	4.4658	923.222	37.9701	42.6392	0.612762	77.8516	8.36861	39.4947	29.0034	6.73253	30.6317	13.5445	2.7144	23.8464	0.231455	1.74952	14.8286	28.5166	3.46599	13.8993	2.79425	0.639136	2.58686	0.403852	2.15151	0.446277	1.13516	0.161412	0.94282	0.144644	1.28353	0.20966	0.369891	0.998116	0.69917
Iona-1	71.83	5.25472	2.78185	15.0865	0.222391	1.67705	0.0172934	0.698976	35.8909	0.295944	1.16834	0.0550918	104.395	27.9622	5.21028	993.449	31.4159	46.0644	0.5245	61.7122	5.58304	25.7051	19.8722	6.08886	31.9807	10.7463	3.31604	2.29651	0.483037	2.11121	11.4939	22.7039	2.75363	10.5563	2.0763	0.500944	1.93101	0.325813	1.7948	0.378476	0.985773	0.163482	0.977631	0.142728	1.42998	0.253038	0.42762	0.381588	0.858598
Iona-1	72.51	4.73403	2.5062	13.9474	0.19126	1.41896	0.0197793	0.807312	37.9113	0.277763	1.08251	0.0471906	75.4133	20.2269	4.00193	976.363	37.4524	42.4472	0.546819	36.5465	4.89135	18.1178	12.7763	4.88414	31.3518	8.81532	3.33004	0.475493	0.755864	2.05635	9.85812	18.8254	2.2784	8.76241	1.75811	0.407462	1.52438	0.242897	1.39222	0.294482	0.790191	0.124163	0.722345	0.118781	1.31099	0.248906	0.628601	0.206507	2.05298
Iona-1	72.77	6.0051	3.1791	17.3957	0.245192	1.79625	0.0161044	0.805542	32.4924	0.340188	1.40651	0.0701365	85.1594	27.1469	4.90276	968.712	38.1904	54.7742	0.680734	53.8179	6.90497	29.0049	21.0934	7.78831	41.2513	9.98223	3.95179	5.18635	0.417067	2.83459	11.7406	23.4229	2.75944	11.0339	2.09644	0.491799	2.00034	0.2985	1.66434	0.356212	0.910095	0.145892	0.859658	0.133149	1.73713	0.332564	0.449001	0.543202	0.473832
Iona-1	73.6	3.83815	2.03192	11.2482	0.155965	1.10801	0.0191308	0.634977	40.0871	0.219436	0.989603	0.0557412	77.2562	18.1781	3.40138	1144.59	29.2128	35.5158	0.487978	47.9372	3.58131	16.0504	10.8983	3.84366	23.9475	8.8054	2.65843	1.04834	0.322025	1.42238	9.71309	18.2482	2.40616	9.31958	1.75106	0.400349	1.61714	0.258505	1.36368	0.287399	0.763654	0.133475	0.731048	0.112075	1.09435	0.16938	0.298265	0.269357	1.28077
Iona-1	74.25	3.9109	2.07043	11.6382	0.156277	1.00188	0.0189146	0.654343	39.2997	0.232362	0.946259	0.0361506	74.9384	19.2652	3.43969	991.981	19.3541	33.9295	0.469717	50.5419	3.08781	13.1581	10.8428	4.04768	25.8341	8.17035	2.61471	0.70914	0.334324	1.63269	9.22571	16.1824	1.96384	7.51178	1.46207	0.36072	1.36885	0.238019	1.25768	0.281327	0.717462	0.121059	0.705906	0.106328	1.14622	0.182807	0.316439	0.218478	1.27187
Iona-1	75.06	5.39399	2.85558	15.3123	0.209689	1.4003	0.0191308	0.822058	35.3314	0.290794	1.37218	0.0516282	81.3408	26.4674	4.02678	936.219	25.0931	47.186	0.577254	50.5118	4.23137	16.5189	12.8873	5.6441	34.6686	9.7292	3.45596	0.850558	0.438311	2.00047	11.7997	22.0255	2.652	10.3274	2.02092	0.46538	1.75206	0.274112	1.60115	0.335973	0.880611	0.146927	0.879965	0.129317	1.55	0.282989	0.346372	0.266364	2.21508
Iona-1	75.88	7.20862	3.81624	19.1507	0.266328	1.97971	0.0219409	0.887925	30.9797	0.339768	1.72837	0.0748988	92.4072	24.9413	4.86859	843.771	36.1966	56.7748	0.694937	61.2714	6.25589	17.2114	14.8949	6.84678	42.5192	10.3394	4.52283	1.42955	0.594851	2.37639	11.7504	22.0356	2.67329	10.6856	2.14981	0.486718	1.78204	0.301426	1.71122	0.368356	0.948425	0.156239	0.948621	0.140812	1.92631	0.399696	0.424413	0.293299	2.7281
Iona-1	76.59	4.81198	2.54746	14.3271	0.194592	1.38994	0.0219409	0.846242	37.1135	0.284909	1.19945	0.0530353	74.5774	23.0074	4.30842	955.61	30.9202	40.3253	0.594501	41.9563	4.16201	14.8283	11.3793	5.23607	33.9585	9.12789	3.49444	0.656877	0.674239	2.20773	10.9118	18.228	2.37035	9.14546	1.87492	0.403397	1.63494	0.262406	1.46764	0.324841	0.81771	0.13658	0.816143	0.118781	1.33438	0.272661	0.37096	0.233442	2.42616
Iona-1	77.6	3.73942	1.97965	11.8742	0.153779	1.41793	0.0156721	0.612169	37.4865	0.255168	1.11684	0.0928659	72.0697	27.1469	3.56395	1110	56.1014	34.2831	0.501166	83.4016	5.09846	34.1683	24.4055	5.29932	25.7631	10.1112	2.40221	4.17593	0.247109	1.41222	10.4382	18.8761	2.44584	9.87376	1.90915	0.463348	1.79516	0.282892	1.54306	0.323829	0.814761	0.125198	0.751355	0.112075	1.0852	0.191069	0.271539	0.622513	0.830988
Iona-1	78.05	2.52967	1.33921	7.67669	0.0972439	0.853657	0.0256158	0.604992	42.5427	0.175191	0.665278	0.04416	55.1043	10.3465	2.075	884.23	25.6328	21.5924	0.410875	24.5446	2.81035	10.1038	8.3504	2.62161	17.8211	6.85261	1.9055	1.5433	0.166603	0.985504	7.62248	12.1216	1.60378	6.24821	1.18013	0.285528	1.1215	0.196073	1.04263	0.218585	0.547433	0.087949	0.510573	0.0795063	0.743469	0.134265	0.203119	0.1257	3.11197
Iona-1	78.28	3.67706	1.94664	11.4329	0.14951	1.41896	0.0162125	0.60224	38.3983	0.244868	1.09861	0.0811765	87.6957	19.8297	4.14379	1076.46	32.3633	33.8486	0.477833	58.847	5.71483	23.1998	18.2625	4.32514	23.8156	9.87308	2.29465	5.79302	0.364514	1.15213	10.3494	19.1697	2.52037	10.1285	2.06221	0.474525	1.83919	0.299475	1.66434	0.340021	0.92582	0.138649	0.858691	0.129317	1.1208	0.199332	0.290782	0.410021	1.09373
Iona-1	79.51	3.31434	1.75461	11.084	0.139827	0.993169	0.0237784	0.693569	39.9939	0.22469	0.961601	0.0528188	95.9409	18.4185	3.16427	979.822	22.3282	27.7155	0.475804	42.5874	3.55455	16.3152	11.6569	3.48765	23.4708	8.46307	2.21157	0.745007	0.31308	1.26795	9.06292	14.5419	1.94738	7.73564	1.48624	0.347511	1.43819	0.232166	1.31985	0.280315	0.708616	0.117955	0.668193	0.110159	0.959085	0.162151	0.261917	0.216982	0.977947
Iona-1	80.25	2.37585	1.25777	8.17958	0.104636	0.820178	0.0273451	0.633797	41.6827	0.173194	0.708836	0.0471906	271.864	13.8191	2.55958	849.117	16.479	21.5621	0.351019	45.9135	2.7826	13.9423	10.3524	2.19827	15.681	6.68988	1.67114	1.00222	0.322025	0.744716	6.98513	10.6634	1.3531	5.19258	1.05628	0.284512	1.00626	0.155103	0.896889	0.205429	0.549399	0.0951918	0.574395	0.0871696	0.699736	0.0867557	0.259779	0.0972677	0.834551
Iona-1	80.48	5.55092	2.93866	17.3444	0.245504	1.85325	0.0163206	0.824418	32.7825	0.332201	1.75627	0.102174	423.945	39.4921	4.71948	1018.6	58.0842	47.7922	0.683777	147.669	6.58786	35.0543	24.461	5.95319	36.9203	9.22314	3.22247	5.16176	0.307489	1.75664	10.1916	19.6659	2.50972	9.82302	2.04912	0.55683	1.74644	0.273137	1.56242	0.332937	0.833435	0.13658	0.761992	0.109201	1.41981	0.270595	0.361339	0.854459	1.39478
Iona-1	82.46	3.80593	2.01486	12.7261	0.168875	1.11112	0.0257239	0.747639	38.3879	0.244133	1.17585	0.0387482	208.79	17.9899	3.79692	797.233	20.4115	30.4739	0.551892	47.0856	3.69527	12.4554	12.2582	3.68963	26.7976	7.42614	2.55437	0.990951	0.456202	1.36548	8.14834	13.9343	1.68315	6.5636	1.2627	0.361736	1.18334	0.210706	1.062	0.239836	0.64375	0.114851	0.701071	0.0977065	0.994682	0.174544	0.305748	0.179571	3.22509
Iona-1	82.67	4.09174	2.16617	14.2039	0.198652	1.30184	0.0198874	0.733777	37.1238	0.260527	1.38613	0.06624	298.937	31.0459	4.16553	1099.52	37.7388	34.7681	0.507253	83.3716	4.51875	23.709	21.2322	4.46285	28.0046	8.61786	2.50977	2.23502	0.287362	1.32992	8.762	15.271	1.99771	7.90478	1.55773	0.4288	1.47754	0.236068	1.39324	0.278291	0.759723	0.117955	0.632414	0.0948328	1.07605	0.172479	0.289712	0.396553	1.17122
Iona-1	83.32	5.83881	3.09107	17.8165	0.307974	1.90508	0.0164287	0.863938	33.2073	0.335774	1.78094	0.0725177	248.971	41.6663	4.99284	932.76	69.5843	48.7521	0.7203	107.195	6.64336	33.6591	32.8243	6.20923	38.2896	9.50396	4.21851	2.90522	0.683184	1.71396	10.6454	18.7849	2.42164	9.50961	1.88801	0.47859	1.67523	0.283867	1.60013	0.310674	0.818693	0.128302	0.763926	0.112075	1.62017	0.334629	0.378444	0.511778	1.74214
Iona-1	84.3	3.649	1.93178	11.9256	0.168667	1.33604	0.0177257	0.717949	38.3568	0.28018	1.08144	0.0613694	233.963	30.7532	4.40782	1041.98	40.8121	32.2421	0.512326	66.9918	4.68325	21.9777	22.7032	4.38634	22.7202	8.43727	2.36373	3.11427	0.552362	1.1186	8.69097	15.5241	1.99094	7.99631	1.58391	0.421687	1.44662	0.249725	1.37999	0.285375	0.781345	0.123129	0.722345	0.109201	0.98858	0.15079	0.280091	0.353156	1.0777
Iona-1	85.31	6.20984	3.28749	18.9557	0.231865	1.55992	0.0154559	0.791386	32.5132	0.352695	1.85497	0.0470824	610.507	33.7637	5.3863	938.21	52.0368	47.9438	0.631023	80.7368	5.26296	26.5403	25.5619	6.24697	37.7317	9.27871	3.51193	1.57302	0.581433	1.72108	11.1387	21.4887	2.64135	9.87077	2.13471	0.55683	1.70802	0.294598	1.6837	0.343057	0.896336	0.148996	0.907041	0.143686	1.63645	0.282989	0.359201	0.410021	1.7074
Iona-1	86.65	3.65419	1.93453	12.8287	0.16721	1.26867	0.0265885	0.729845	38.5744	0.25275	1.13186	0.0571482	137.927	22.7879	3.55773	922.698	29.6535	31.5752	0.561022	57.3843	5.66132	18.2095	16.3104	3.77226	26.7672	8.92348	2.95226	0.913069	0.449493	1.35227	10.3692	17.9343	2.20097	8.72063	1.55773	0.414574	1.58247	0.246799	1.32189	0.304602	0.796088	0.130371	0.748454	0.115907	1.00994	0.203463	0.308955	0.152635	2.14026
Iona-1	87.74	3.5804	1.89547	11.8435	0.16065	1.761	0.029831	0.730828	39.4447	0.233203	1.03295	0.0435106	260.465	16.0038	3.47076	918.086	20.0701	30.6962	0.529572	50.9627	5.20449	17.3031	11.9714	3.21121	23.9576	8.72106	2.80097	2.32622	0.391349	1.11758	9.31746	15.6153	1.92028	7.664	1.4953	0.39222	1.337	0.236068	1.32597	0.286387	0.735153	0.123129	0.740718	0.113033	1.03536	0.196233	0.274746	0.178075	1.80003
Iona-1	87.88	5.30253	2.80716	17.6933	0.220309	1.48633	0.0141589	0.815963	33.6943	0.329048	1.60499	0.0567153	200.811	30.9936	4.71845	975.63	63.0632	43.4071	0.588414	100.182	5.70096	31.8768	22.2406	5.35134	35.1656	9.22314	3.70344	2.51068	0.477446	1.67129	10.7441	20.2938	2.40713	9.34445	1.86384	0.454203	1.58528	0.274112	1.56242	0.314722	0.897319	0.138649	0.768761	0.116865	1.33438	0.297448	0.331405	0.386078	1.24871
Iona-1	88.77	1.851	0.97992	5.69184	0.0844377	1.06137	0.0331816	0.566652	44.159	0.152491	0.31424	0.0345271	162.245	6.98899	1.56143	687.804	13.4829	19.1371	0.30841	40.0528	3.57338	15.8773	7.87303	1.40567	8.23403	4.36797	1.45864	1.97268	0.27059	0.419601	5.22603	8.62182	1.04338	3.97776	0.685724	0.180868	0.679274	0.114132	0.639033	0.145723	0.360697	0.0610469	0.343283	0.0478954	0.63261	0.100182	0.23626	0.106246	0.342014
Iona-1	89.32	3.91298	2.07153	14.4605	0.176372	1.12978	0.0219409	0.752947	37.0824	0.279129	1.01439	0.0457835	163.954	23.9168	3.91392	939.468	25.6218	34.7782	0.557979	112.004	5.18269	21.0204	19.6317	3.26834	27.4062	8.71907	3.12803	1.19488	0.296307	1.54023	9.6756	16.0406	1.97835	7.79832	1.45804	0.371898	1.41851	0.232166	1.3861	0.291446	0.780362	0.137614	0.791001	0.126444	1.0974	0.221021	0.372029	0.170593	1.80092
Iona-1	89.6	3.96079	2.09684	14.1218	0.198757	1.35574	0.0148074	0.753045	35.2796	0.304562	1.05462	0.0637506	175.068	26.4047	3.99986	1052.36	36.7033	36.2837	0.548848	123.825	5.19855	28.4549	22.1851	4.0232	27.1222	8.85501	3.18312	3.56517	0.233692	1.48842	9.20992	16.2431	1.94448	7.49088	1.53759	0.374946	1.3801	0.218509	1.40139	0.30865	0.775448	0.126233	0.761992	0.118781	1.18792	0.238578	0.324991	0.326221	0.640386
Iona-1	90.57	2.88199	1.52573	10.6427	0.127125	0.98892	0.0235622	0.699074	39.4862	0.230471	0.710875	0.0416706	85.2449	18.2199	3.22743	948.273	21.3038	27.0284	0.502181	64.1166	4.07778	16.2745	13.8032	2.70219	20.1033	8.16737	2.71265	1.15491	0.18673	1.15721	8.44728	14.4507	1.69767	6.65116	1.27378	0.306866	1.26767	0.211681	1.19144	0.263111	0.680114	0.123129	0.744586	0.109201	0.813646	0.164216	0.244812	0.18406	2.0414
Iona-1	90.83	5.29318	2.80221	18.227	0.220413	1.65425	0.0161044	1.02831	31.6325	0.439397	1.28636	0.0750071	99.9305	29.2166	5.07981	1074.37	75.8741	55.441	0.690879	157.687	5.84465	28.2716	21.5745	6.20209	36.7479	13.0186	3.83199	5.05313	0.474092	2.26666	12.5002	25.7824	3.14078	12.576	2.5395	0.565975	2.28423	0.403852	2.30745	0.513067	1.29733	0.209008	1.30448	0.189666	1.60797	0.293317	0.377375	0.600067	0.936086
Iona-1	91.74	5.04582	2.67126	16.4207	0.214895	1.63455	0.0148074	0.913682	32.4303	0.472291	1.1501	0.0766306	102.78	31.0041	4.56624	1064.93	55.044	57.0071	0.734503	183.634	5.61772	37.0097	19.9647	5.94401	31.0577	12.6514	4.00339	4.52743	0.47521	1.67231	12.8455	27.4128	3.45825	13.6605	2.87984	0.583249	2.56625	0.424338	2.43281	0.506995	1.28947	0.2028	1.1923	0.181044	1.81443	0.269562	0.409446	0.728759	0.969041
Iona-1	92.73	4.32351	2.28886	14.286	0.205212	1.82319	0.0256158	0.878881	36.2017	0.449591	0.815371	0.0464329	136.977	14.9271	3.92531	981.499	27.186	42.1138	0.711169	46.5446	6.11716	18.179	16.773	4.37206	23.1868	13.4056	3.62474	1.8989	0.44502	1.15822	12.8949	22.4811	2.68297	10.4866	1.98669	0.503992	2.03501	0.316058	1.81722	0.42199	1.11256	0.170724	1.09174	0.16476	1.28149	0.225152	0.323922	0.194535	2.23734
Iona-1	94.22	3.45777	1.83054	14.5118	0.15711	0.980732	0.0139428	0.726305	36.6576	0.406397	0.684268	0.0377741	191.882	22.882	3.43555	1134.11	19.1888	35.2531	0.595515	40.123	4.45929	17.8429	20.2053	3.7845	20.6713	8.99393	2.30514	0.851583	0.128586	1.24661	8.5193	14.3292	1.77897	6.8203	1.35433	0.352591	1.30608	0.22046	1.24443	0.288411	0.79707	0.124163	0.773595	0.119738	0.96417	0.175577	0.265124	0.14665	0.966369
Iona-1	94.73	5.14352	2.72298	21.1827	0.220413	1.41896	0.0137266	0.973749	31.9951	0.563513	0.998829	0.0434024	125.008	28.6103	4.88722	875.53	41.2417	44.7004	0.623922	66.8015	5.67123	25.7662	23.6561	5.05348	31.6967	9.2668	3.41311	0.745007	0.316434	1.97609	10.2606	18.0457	2.18161	8.20127	1.63527	0.391204	1.57873	0.272161	1.50025	0.321805	0.845229	0.128302	0.784232	0.124528	1.34964	0.260267	0.363477	0.317242	2.32374
Iona-1	95.31	4.78288	2.53206	16.5952	0.209481	1.87191	0.0148074	0.790501	32.596	0.620263	0.991749	0.0784706	124.248	25.4535	4.91415	1071.22	73.2745	38.6885	0.711169	117.313	7.89097	31.6833	29.1237	5.23913	26.3209	9.24894	2.79135	4.72008	0.344388	1.32586	9.16651	16.6685	2.09837	8.33957	1.76919	0.4288	1.6668	0.25948	1.45439	0.325853	0.844246	0.132441	0.840318	0.115907	1.18284	0.213791	0.307886	0.550685	0.498771
Iona-1	96.1	3.8818	2.05503	14.7068	0.160338	0.938443	0.0153479	0.74233	36.554	0.479122	0.606486	0.0434024	145.811	15.5752	3.54117	993.868	18.3406	33.6769	0.595515	33.9016	3.6368	13.4025	13.868	3.14287	18.1964	7.65238	2.63657	0.533904	0.187848	0.919465	8.44826	14.5722	1.7751	6.83621	1.31305	0.349543	1.27985	0.196073	1.20774	0.262099	0.683063	0.117955	0.644985	0.102496	1.01807	0.17661	0.354925	0.145153	1.81606
Iona-1	97.41	3.41619	1.80853	17.6318	0.156069	0.86537	0.0148074	0.665256	35.2588	0.432566	0.579128	0.0411294	152.556	16.2442	3.26781	1097.43	29.7967	30.9286	0.643197	50.8024	3.3524	13.3414	14.2751	2.73177	19.3324	7.94014	2.78348	0.853632	0.219156	1.11961	8.7472	14.0963	1.80317	6.95362	1.26572	0.34243	1.28078	0.214608	1.24749	0.276267	0.687977	0.114851	0.673995	0.104412	0.944846	0.197266	0.346372	0.133182	1.27365
Iona-1	98.08	5.09051	2.69492	18.2681	0.213125	1.80972	0.0149155	0.967064	30.8657	0.584741	0.65573	0.0560659	195.586	17.9585	3.97087	1194.91	41.8916	51.844	0.796388	73.8443	7.69377	22.4971	22.6847	6.80495	22.5072	11.7683	5.14721	4.15749	0.272826	1.37259	13.8025	26.2685	3.13498	12.2178	2.41161	0.463348	2.1109	0.356053	1.98131	0.415918	1.05457	0.172794	1.09174	0.159013	1.51847	0.319137	0.338889	0.471374	0.458691
Iona-1	98.56	3.67602	1.94608	18.7402	0.171374	1.20855	0.0212924	0.87485	39.6623	0.534822	0.557993	0.0628847	71.3667	21.9203	3.91703	1089.04	34.8527	41.6187	0.678705	50.3916	3.74482	14.0441	14.3583	3.54376	16.8474	8.35888	3.80226	1.58327	0.171076	0.962137	10.3198	16.4457	1.91931	7.27399	1.43489	0.331253	1.28453	0.211681	1.21386	0.276267	0.774466	0.130371	0.79777	0.110159	1.09029	0.263366	0.365615	0.236435	1.32441
Iona-1	99.82	7.97874	4.22394	34.2475	0.724957	6.6004	0.0539337	1.39009	21.1263	1.15078	0.975334	0.0724094	90.6024	88.2247	12.011	785.493	78.6279	67.7175	0.874505	130.738	14.0022	23.5053	33.6292	6.43467	29.6681	7.47377	9.68928	4.65757	0.284008	1.57477	8.72353	15.8077	1.9106	7.71275	1.61513	0.400349	1.41851	0.22924	1.31781	0.285375	0.736135	0.120024	0.701071	0.112075	1.76663	0.43068	1.32455	0.169096	1.1926
Iona-1	100.3	6.89059	3.64788	38.1782	0.278926	2.41918	0.0211844	1.69779	23.9134	0.985254	0.761406	0.0741412	112.184	50.0184	6.24778	937.162	41.8585	54.1376	0.741604	53.2969	7.60954	19.2076	13.9883	6.18067	23.0245	8.7796	4.94696	1.92144	0.469619	1.19378	10.8921	19.9292	2.34905	9.01712	1.79537	0.438961	1.60215	0.245823	1.37897	0.289423	0.820658	0.127267	0.750388	0.107286	1.55915	0.341859	0.457553	0.234939	2.23645
Iona-1	100.9	3.23639	1.71335	25.6369	0.16596	1.78899	0.0234541	1.32619	32.8136	0.433827	0.499737	0.0553082	72.4116	23.7914	4.45338	1214.82	28.7061	42.7099	0.685806	67.2322	8.25068	18.2197	23.6653	5.51353	17.5473	10.8852	2.43894	3.14911	0.118523	1.14603	10.3494	17.914	2.10902	8.29081	1.64433	0.334301	1.6415	0.269235	1.67555	0.388595	1.02509	0.170724	0.941853	0.145602	1.12181	0.198299	0.322853	0.520756	0.105989
Iona-1	101.83	4.43991	2.35049	20.2078	0.272158	3.3427	0.0888446	1.89441	36.5022	0.733134	0.347069	0.0947059	63.701	68.4264	13.8333	876.578	38.1023	22.1582	0.395658	96.4654	14.8148	24.6663	18.1237	5.63084	10.4777	14.249	1.66152	1.36089	0.157658	0.665469	4.78699	9.14841	1.21469	5.34182	1.38756	0.473509	1.65087	0.304352	2.0659	0.472589	1.27865	0.214182	1.22808	0.195413	0.734315	0.139429	0.0844549	0.190046	0.251167
Iona-1	102.21	7.62226	4.03522	24.9082	0.573677	3.30746	0.027129	1.74302	29.4877	1.21699	0.529347	0.129558	53.4799	127.842	19.6835	1065.98	57.6656	37.183	0.494065	131.94	16.9156	39.5252	28.8092	6.49383	14.6565	22.5543	3.32217	2.25347	0.351096	0.828027	8.89322	19.2001	2.48553	10.9344	2.92918	0.895196	2.98506	0.585293	3.79853	0.890531	2.43544	0.408704	2.58961	0.37071	1.1747	0.22825	0.187084	0.653938	0.718764
Iona-1	102.95	9.24461	4.8941	33.0159	0.626359	4.53156	0.034911	1.78529	21.1988	1.29581	0.721711	0.0872377	63.9574	239.796	27.2939	960.222	48.1814	54.1578	0.686821	163.597	27.5287	65.4442	37.2465	9.76421	24.6169	13.8818	4.94433	1.68677	0.441666	1.42949	8.49365	17.4381	2.21549	9.64094	2.22332	0.617797	2.23458	0.403852	2.45421	0.535331	1.47227	0.225563	1.3915	0.194455	1.55101	0.328432	0.208465	0.297789	1.14361
Iona-1	103.44	1.59221	0.842918	15.5792	0.0765249	1.20441	0.147642	1.83837	41.7242	0.234149	0.189574	0.0324706	26.17	29.7602	5.48984	822.598	9.04915	11.2963	0.295221	29.7842	3.97571	17.6697	8.1626	1.78004	6.10808	9.53273	0.868363	1.08728	0.224746	0.364738	4.38051	6.75447	0.812054	3.16291	0.707877	0.238787	0.830119	0.173637	1.13436	0.294482	0.903215	0.163482	0.938952	0.158055	0.330544	0.0557715	0.0502453	0.134678	0.670669
Iona-1	104.18	2.38001	1.25998	11.7408	0.110467	2.41296	0.084197	1.43924	42.9261	0.321692	0.314025	0.0819341	46.5361	31.9762	3.26367	897.437	14.298	21.9561	0.434209	42.8579	5.14305	19.2585	5.54442	2.52878	10.1734	8.51466	1.92649	0.425279	0.152067	0.549647	8.00923	12.1418	1.4044	5.60747	1.07037	0.271302	1.06904	0.197049	1.03142	0.227693	0.669303	0.107608	0.596636	0.0967486	0.643797	0.142527	0.0106905	0.0508785	0.439097
Iona-1	104.83	5.98431	3.1681	23.4714	0.288192	1.75271	0.020752	1.65159	35.1138	0.704864	1.0588	0.0812847	114.369	33.6174	5.8305	1140.4	41.2857	54.0264	0.732474	91.1557	6.53237	17.4253	21.8243	5.74101	34.0701	10.4684	5.82844	1.38446	0.549007	1.86738	13.1613	22.9368	2.76331	10.6657	2.05516	0.489767	1.87386	0.301426	1.64905	0.3552	0.962185	0.151065	0.94282	0.140812	1.53169	0.403827	0.262986	0.245414	2.06099
Iona-1	105.96	2.33532	1.23632	10.6222	0.0751714	1.24068	0.0640935	0.909651	46.1276	0.32495	0.249546	0.0518447	44.0188	9.44548	1.36677	931.397	10.8248	21.9056	0.354063	30.1949	2.33469	6.20427	6.49825	2.11769	7.2806	4.493	1.35982	1.86713	0.341033	0.406394	6.01333	10.2785	1.18856	4.69411	0.803536	0.171723	0.777651	0.117059	0.591131	0.139651	0.361679	0.0651857	0.361656	0.0526849	0.578706	0.102248	0.0491763	0.12121	1.28968
Iona-1	106.45	8.78212	4.64926	29.0236	0.601163	3.26807	0.0288583	2.16378	27.343	1.0274	1.52024	0.119384	131.847	53.8965	9.56011	1021.75	65.057	83.3384	0.928274	146.366	9.39028	25.5727	21.889	8.10148	41.5049	11.3615	6.67406	1.96243	0.467383	2.28495	12.6482	25.5799	3.06432	12.4964	2.61804	0.613733	2.16993	0.35898	2.0975	0.429074	1.1214	0.174863	1.06563	0.148476	2.2121	0.476124	0.488556	0.390567	1.9835
Iona-1	106.94	6.55593	3.47071	24.4258	0.292669	2.20462	0.0226975	1.90719	33.6218	0.797241	1.20482	0.114946	109.62	27.5441	6.68059	1234.74	66.6322	64.272	0.854215	98.1986	6.135	22.5378	18.1977	6.83964	33.279	13.4254	4.64089	3.99352	0.536708	2.03502	15.2923	30.6837	3.55697	13.6008	2.65831	0.621862	2.38636	0.395073	2.3258	0.475624	1.23344	0.198661	1.15653	0.174339	1.64153	0.337728	0.197774	0.508785	1.7359
Iona-1	107.17	6.95295	3.68089	26.2526	0.32432	2.47308	0.0192389	1.90031	28.8868	0.789149	1.30996	0.0862635	120.259	31.2236	6.67127	879.618	38.8073	64.2417	0.929288	81.0373	6.86038	18.0058	20.9269	7.49861	43.9798	11.1432	6.31378	2.11717	0.490864	2.56333	14.5129	28.79	3.15917	12.0984	2.36328	0.563943	2.07623	0.342397	1.86308	0.405799	1.04867	0.179002	1.0724	0.156139	1.92631	0.468894	1.32348	0.170593	2.83231
Iona-1	107.82	7.17224	3.79698	27.6895	0.328276	2.0222	0.0186984	1.37632	28.2651	0.865237	1.33463	0.116136	159.585	44.1124	6.2778	911.063	77.6916	70.3546	1.0561	229.918	5.67123	31.4593	22.0001	7.82095	40.8456	10.4288	5.32561	4.25074	0.373459	2.48103	12.6186	23.0179	2.73814	10.4866	2.00078	0.485702	1.75299	0.293622	1.6623	0.369368	0.955305	0.157273	0.935084	0.139854	2.09616	0.450304	0.354925	0.57762	1.72432
Iona-1	108.77	5.50831	2.9161	21.3675	0.244463	2.09683	0.0178338	1.07943	34.4092	0.625623	1.02501	0.109642	91.9513	24.1155	4.54864	1117.34	62.2811	64.8277	0.894795	92.368	6.90101	30.4816	24.6922	7.22217	32.6501	13.4949	5.12623	7.04016	0.291835	1.85823	16.644	32.5673	3.78926	14.6355	2.82547	0.598491	2.44913	0.382392	2.04246	0.474613	1.16465	0.196592	1.20294	0.172423	1.70662	0.383171	0.295058	0.520756	0.0997542
Iona-1	109.22	5.42517	2.87208	21.7164	0.217393	1.92892	0.0190227	1.19347	33.7979	0.641912	0.946474	0.092433	87.6007	22.5579	4.90379	1050.26	54.4381	54.5721	0.705082	92.2477	6.89803	22.711	19.2061	6.46017	29.2421	12.5721	4.71959	5.18738	0.399176	1.69974	14.0295	25.9951	2.84171	10.9642	2.11759	0.486718	1.86543	0.326789	1.89875	0.401751	1.13516	0.180037	1.15653	0.179129	1.42998	0.367679	0.228777	0.628499	1.32352
Iona-1	110.01	7.33957	3.88557	30.091	0.339	2.23883	0.014267	1.34093	25.8199	0.827928	1.37969	0.101741	122.443	66.8898	6.47971	859.913	143.09	71.456	1.06929	449.918	7.19235	65.9229	37.9126	8.70638	47.1951	11.6691	6.03831	17.831	0.423776	3.01442	14.3452	26.0457	2.94914	11.1333	2.177	0.518218	1.96849	0.321911	1.86716	0.417942	1.05457	0.190384	1.10818	0.162844	1.92529	0.464763	0.458622	1.02356	0.930742
Iona-1	110.49	4.27466	2.263	17.642	0.189803	1.7921	0.0150236	0.854893	37.6212	0.527571	0.801531	0.113322	94.3356	41.2273	4.30428	1211.68	76.9756	36.1625	0.722329	393.816	4.72091	37.855	22.879	4.36084	27.1425	10.786	3.77165	25.0863	0.420421	1.72412	11.5827	20.3444	2.37422	8.87683	1.7994	0.451154	1.62838	0.246799	1.53796	0.334961	0.920906	0.151065	0.90414	0.139854	0.986546	0.243742	0.125079	0.89187	1.4402
Iona-1	111.36	5.96353	3.15709	24.1898	0.269035	1.48944	0.0121053	1.16693	31.2595	0.546908	1.12221	0.0719765	91.5523	72.754	5.55611	1133.06	74.8056	64.666	1.10378	641.266	4.8309	40.6557	26.8201	7.46903	48.0167	8.76075	7.88435	31.3374	0.499809	3.26842	12.6186	21.5394	2.42164	8.87186	1.62419	0.366817	1.43725	0.23997	1.36776	0.299542	0.837366	0.137614	0.888668	0.134107	1.54389	0.480255	0.316439	0.679377	1.44376
Iona-1	111.88	5.45323	2.88694	19.8999	0.217081	1.58584	0.0275613	1.18265	35.1449	0.531564	0.78458	0.0833412	89.3485	36.8579	4.86237	1033.28	43.8083	49.4594	0.989144	383.497	5.26692	34.7182	19.8352	6.03683	34.0498	8.27453	5.48651	26.521	0.319788	2.23008	12.6186	21.6609	2.45939	8.92857	1.67252	0.403397	1.51033	0.233142	1.35043	0.281327	0.763654	0.130371	0.791968	0.118781	1.29675	0.367679	0.431896	0.659924	1.07058
Iona-1	112.45	3.07634	1.62861	13.2084	0.119837	1.05101	0.0171853	0.618952	40.9575	0.385274	0.49405	0.326762	62.7795	30.6278	3.3258	1297.63	112.247	33.3232	0.799431	322.887	4.0867	34.8914	19.5392	4.5873	18.2776	19.4683	2.95051	25.4757	0.263881	1.05662	28.2069	55.0181	6.48869	25.3809	4.73965	1.01408	4.3005	0.60968	3.1493	0.637539	1.53615	0.222459	1.2774	0.18775	0.714991	0.168347	0.241605	0.574627	1.06701
Iona-1	112.77	4.6353	2.45393	18.032	0.175226	1.31324	0.0161044	0.920072	36.8234	0.52137	0.623115	0.0902682	68.9065	33.471	5.36042	1373.09	44.1497	45.6098	0.916099	354.244	5.05684	35.0441	20.6586	7.6302	24.4749	13.1972	5.6002	26.0496	0.534472	1.55242	23.9547	46.6332	5.11914	17.889	3.34605	0.709247	2.77144	0.402877	2.27382	0.490804	1.27276	0.213147	1.29481	0.198287	1.14216	0.317072	0.280091	0.885884	1.77954
Iona-1	113.42	6.50501	3.44375	27.2892	0.283819	1.75893	0.0149155	1.27408	29.3219	0.624152	1.0705	0.106287	94.573	64.3706	5.76009	1121.53	126.677	63.5344	1.27929	682.842	6.25094	51.3594	29.022	7.84442	48.7977	10.2501	9.84669	39.1667	0.0626159	3.45028	16.3874	29.5799	3.29274	11.79	2.36328	0.524315	2.07155	0.305328	1.68065	0.37038	1.00346	0.159343	0.975697	0.14177	1.65679	0.585601	0.521696	0.939755	0.420393
Iona-1	114.04	1.49556	0.791749	7.39857	0.053203	0.690409	0.0714432	0.62141	46.9358	0.176242	0.195582	0.0528188	29.5137	15.2407	1.16796	655.835	27.3843	16.8435	0.607689	152.577	1.62219	15.0524	6.88126	1.95345	8.53224	9.71332	1.70087	9.33667	0.122996	0.562855	12.4509	18.7849	2.01126	7.20534	1.33218	0.293657	1.30889	0.207779	1.18736	0.279303	0.766603	0.127267	0.825813	0.136023	0.446488	0.103281	0.0566596	0.366624	1.41348
Iona-1	115.45	6.73781	3.567	28.5618	0.299228	1.95068	0.0157802	1.21313	27.9128	0.709803	0.993036	0.11776	91.5428	64.1406	5.59753	1056.55	95.085	61.6954	1.259	657.796	7.18343	58.8754	34.5821	7.81789	40.8456	10.8951	7.81526	44.6082	0.306371	2.71369	15.5982	27.7268	3.05174	11.5612	2.14578	0.532444	1.9638	0.318985	1.7102	0.379488	1.0015	0.161412	0.935084	0.148476	1.61814	0.464763	0.457553	1.23455	0.556664
Iona-1	116.15	5.2568	2.78295	26.7247	0.232594	1.61175	0.0127538	0.927544	30.1197	0.580222	0.858822	0.148607	81.2838	74.437	5.06221	1005.08	181.534	56.2696	1.12407	724.818	5.98437	56.9098	37.4408	6.51831	36.3219	13.8223	5.86079	47.1803	0.568016	2.40077	17.2951	30.4002	3.49116	13.5311	2.58279	0.564959	2.41821	0.372637	2.26668	0.464493	1.25114	0.188314	1.13815	0.182002	1.30285	0.362515	0.359201	1.10137	0.293919
Iona-1	116.76	6.6318	3.51088	30.1115	0.301519	1.99836	0.0163206	1.16693	28.3583	0.710854	1.00162	0.126744	98.4107	69.8794	5.53126	936.848	86.6031	58.6844	1.35335	775.911	7.12199	62.2667	37.8016	7.54247	43.9189	10.1708	7.42	55.6039	0.158776	2.94229	14.1183	24.2736	2.84074	10.9344	2.15082	0.489767	1.8748	0.295573	1.63071	0.342045	0.899284	0.1521	0.926381	0.139854	1.52965	0.417254	0.504591	1.0041	0.128255
Iona-1	117.21	1.4332	0.758736	7.91582	0.05768	0.791986	0.0799818	0.532637	47.5886	0.186331	0.186677	0.0461082	58.6284	14.2686	1.432	638.645	19.332	12.7917	0.449426	163.497	1.96506	14.2173	9.72332	1.60357	8.15796	4.20524	1.57932	13.2503	0.34886	0.555743	5.1392	9.0198	1.02305	3.82354	0.74312	0.181884	0.693328	0.124863	0.616611	0.137628	0.381336	0.0620816	0.377128	0.0593903	0.339697	0.0877885	0.0769716	0.433963	1.2968
Iona-1	118.16	3.82048	2.02256	22.1372	0.181578	1.40652	0.0123215	0.820977	35.5593	0.452218	0.62687	0.107153	74.6629	52.1299	3.63021	1139.35	121.169	39.7696	0.985086	582.359	4.50983	48.4874	29.355	4.56792	26.2905	7.50751	6.01033	41.0932	0.354451	1.78915	9.38159	14.7748	1.73638	6.60041	1.31808	0.307882	1.14586	0.192171	1.03244	0.234776	0.667338	0.107608	0.624678	0.0938749	0.996716	0.266464	0.260848	0.938259	0.612776
Iona-1	119.49	2.91733	1.54443	17.1905	0.144408	1.07381	0.0143751	0.591917	39.4033	0.437926	0.468302	0.205106	131.847	46.6316	3.05555	1222.16	114.67	34.4751	0.721314	414.153	3.58131	36.1135	26.9866	3.30506	16.3403	9.15765	3.53816	25.6295	0.314198	1.02106	10.458	16.3748	2.00352	7.58441	1.51947	0.362753	1.42038	0.216559	1.28214	0.279303	0.737118	0.123129	0.72718	0.113033	0.808561	0.185905	0.212741	0.664413	0.505006
Iona-1	119.77	6.45928	3.41954	23.9127	0.327756	2.88249	0.0177257	1.02339	31.0419	0.963709	0.734156	0.157591	141.062	44.5305	5.33453	971.961	91.9786	76.8515	0.912041	481.375	6.96641	38.2013	18.614	6.66316	26.3108	12.4728	6.72828	41.7183	0.244873	1.77188	15.0851	29.3774	3.39146	13.4217	2.49519	0.603572	2.39479	0.364833	2.11788	0.465505	1.26195	0.21832	1.31705	0.195413	1.7829	0.358384	0.65212	1.06097	0.814956
Iona-1	120.4	1.19104	0.630538	6.71197	0.0406051	0.349299	0.0445304	0.610301	48.9562	0.165102	0.112114	0.0382071	29.1147	13.6205	0.912834	651.014	13.9785	14.0548	0.383483	161.594	1.13563	7.55776	5.7128	1.08843	4.09369	3.53942	0.942694	6.63333	0.328734	0.296667	4.04112	6.3089	0.737527	2.64852	0.520586	0.119901	0.481582	0.0819411	0.482078	0.101197	0.299761	0.0620816	0.32491	0.0574744	0.347834	0.05887	0.0342096	0.249903	0.827425
Iona-1	121.09	4.36508	2.31087	26.9403	0.210313	1.32879	0.0100518	0.793549	30.3477	0.557943	0.635668	0.115704	88.8071	70.7784	3.79588	960.117	136.371	45.731	0.94552	824.499	4.79225	60.7595	35.8866	5.32176	25.2052	8.50276	4.85076	48.3588	0.2404	1.74648	11.3755	19.4837	2.24452	8.26295	1.56679	0.401365	1.55062	0.235093	1.33106	0.299542	0.787242	0.131406	0.785199	0.121654	1.14012	0.298481	0.302541	0.986144	0.239588
Iona-1	121.51	4.09694	2.16892	24.3437	0.192614	1.71125	0.0113488	0.744198	31.9433	0.498144	0.581917	0.146442	75.9928	69.4195	4.21316	993.763	182.305	45.4582	0.934361	826.904	4.60298	62.8778	36.6822	4.73623	23.2476	10.8852	4.22376	51.0027	0.20462	1.61541	12.7074	23.2609	2.81557	11.1532	2.17196	0.523299	1.97598	0.320936	1.75912	0.392643	1.01034	0.162447	0.968928	0.153265	1.19097	0.2613	0.241605	0.878402	0.0667997
Iona-1	122.18	3.66978	1.94278	20.8851	0.156694	1.06137	0.0140509	0.754618	37.8802	0.469769	0.444055	0.218635	92.7017	32.3944	2.99964	1041.45	55.1321	37.9711	0.782185	338.916	3.85085	34.7895	19.7149	4.98309	17.0604	8.03639	3.69732	30.9685	0.264999	1.10336	9.84332	17.2254	2.05191	8.057	1.46107	0.359704	1.35011	0.230215	1.2852	0.271207	0.670286	0.11692	0.679797	0.10537	0.91942	0.237545	0.253365	0.698831	0.917382
Iona-1	122.91	5.6164	2.97332	22.6503	0.244567	1.54749	0.0132943	0.922137	32.7411	0.687838	0.575588	0.105313	73.827	46.8302	4.88929	959.698	115.441	50.298	0.927259	717.304	6.2331	58.7328	35.0354	5.82976	20.0526	8.32117	3.94567	60.3589	0.185611	1.39393	10.6356	19.1394	2.35583	9.13949	1.66648	0.400349	1.52064	0.243872	1.37693	0.307638	0.813778	0.137614	0.766827	0.129317	1.39642	0.305711	0.34851	1.04899	0.231572
Iona-1	123.14	13.0848	6.92712	38.0243	0.495486	2.187	0.0163206	1.83936	17.3652	1.86436	0.768165	0.21344	131.278	64.2452	4.19659	1009.17	57.3462	138.931	1.21944	1327.41	7.2409	43.9248	22.0371	8.85634	24.5966	8.49581	6.81573	54.3742	0.694366	1.68552	12.0267	25.1242	3.14853	12.6059	2.48311	0.55175	2.01252	0.277039	1.42075	0.316746	0.786259	0.130371	0.752322	0.124528	4.59812	0.476124	1.06798	1.45303	6.08768
Iona-1	123.68	0.867507	0.459258	4.30018	0.0241548	4.53985	0.0462597	0.711657	47.1741	0.153016	0.0582561	0.0427529	20.2711	7.68726	0.260307	599.654	18.3957	14.1962	0.321599	105.091	0.968162	10.4389	5.05317	0.968056	2.16349	2.07186	0.625256	13.5474	0.100633	0.206245	2.64014	4.24408	0.483942	1.94411	0.328262	0.0701118	0.29888	0.0487744	0.25174	0.0597061	0.159218	0.0382837	0.142148	0.0258635	0.289861	0.0413122	0.0844549	0.30976	0.72678
Iona-1	124.03	6.23998	3.30345	29.9781	0.294647	1.43969	0.0108083	1.05584	27.3533	0.675017	0.664849	0.072193	67.3676	42.1785	5.24962	779.519	73.671	60.1192	1.14233	642.468	7.61945	73.3676	27.7823	9.67036	27.4265	8.21301	5.15858	68.5058	0.461792	2.02282	11.3459	21.9647	2.5736	9.71258	1.82558	0.407462	1.62932	0.242897	1.4819	0.30865	0.778397	0.139684	0.859658	0.127402	1.68425	0.311907	0.610427	1.76877	1.80181
Iona-1	125.13	3.35903	1.77827	18.9146	0.145658	2.24194	0.0201035	0.582775	37.2378	0.692568	0.370565	0.409454	257.711	31.3281	2.54094	1087.99	74.1667	35.1116	0.712184	500.811	4.38398	36.8773	17.8184	3.03168	9.99992	19.2599	2.97762	35.1291	0.0648522	0.594351	21.1725	29.5394	3.4689	14.2276	2.73484	0.719409	2.68992	0.417509	2.44096	0.553546	1.38382	0.203835	1.14782	0.179129	0.805509	0.139429	0.310024	0.772156	0.72589
Iona-1	126.33	3.24783	1.7194	23.6766	0.143471	2.00251	0.00875476	0.673809	32.5028	0.430359	0.45693	0.0829082	165.664	29.342	3.23468	988.522	130.753	41.073	0.887693	439.199	4.80117	63.3463	23.4618	6.03989	17.8009	11.5401	5.24078	56.8234	0.155422	1.18464	17.4924	30.6027	3.50858	12.7352	2.31394	0.52025	2.1971	0.324838	1.8213	0.403775	1.06636	0.166586	1.0811	0.171465	0.918403	0.296415	0.361339	0.664413	0.354484
Iona-1	127.31	6.75028	3.5736	27.9358	0.311306	2.29169	0.0154559	1.14726	25.8406	0.706125	0.753682	0.0866965	94.3261	53.4679	5.20303	809.81	138.243	81.2064	1.26509	1123.04	8.94733	96.9952	36.0346	7.47617	30.6317	9.3958	8.10997	89.2163	0.518818	2.24736	12.9442	23.0482	2.62103	10.1683	2.02495	0.450138	1.68179	0.27021	1.593	0.339009	0.910095	0.1521	0.917678	0.143686	2.42975	0.608323	0.601875	1.78075	0.944993
Iona-1	127.77	1.95493	1.03494	21.1109	0.0948493	0.652785	0.00886284	0.474242	37.3932	0.281756	0.356188	0.079553	54.8288	26.2479	2.35353	992.505	93.5538	30.5749	0.831895	405.838	3.18394	45.646	18.5678	3.19999	12.3845	9.82347	3.07031	32.4442	0.239282	0.796531	12.1549	18.471	2.0432	7.28294	1.35534	0.334301	1.40071	0.214608	1.25157	0.309662	0.831469	0.135545	0.929282	0.148476	0.680411	0.152855	0.194567	0.492324	0.635933
Iona-1	128.36	1.00282	0.530895	5.23411	0.0311306	0.279335	0.0432334	0.754029	48.8008	0.135045	0.104604	0.0529271	95.6559	10.3424	0.664124	682.354	11.2467	14.8227	0.610733	105.392	1.32689	10.388	7.81474	1.41281	3.67174	4.54162	1.10622	6.99302	0.37905	0.271268	6.89535	10.552	1.22244	4.48319	0.812598	0.172739	0.734552	0.111206	0.562594	0.140663	0.339074	0.0682898	0.347151	0.0536428	0.343765	0.0784933	0.065212	0.215485	1.40814
Iona-1	129.27	4.36196	2.30922	32.082	0.189074	1.44384	0.0098356	1.86492	27.1357	0.425524	0.72847	0.0803106	81.3883	33.701	3.60433	775.64	103.754	52.814	1.05712	351.138	7.72548	72.2066	28.4946	6.54075	29.3841	8.215	6.42658	59.1291	0.213565	2.13357	12.9245	23.0584	2.63264	9.81108	1.78026	0.416607	1.56092	0.242897	1.41056	0.287399	0.79707	0.128302	0.764893	0.118781	1.31506	0.418287	0.411584	0.902345	0.710749
Iona-1	130.17	1.05593	0.559011	5.30903	0.0294647	0.284518	0.0319927	0.860694	47.3917	0.139354	0.0837901	0.0362588	30.2166	8.33954	0.525894	675.855	13.8794	14.5802	0.465659	108.297	1.16734	9.14549	6.18	1.70965	2.99318	3.7865	0.91471	9.69738	0.362278	0.246884	5.76866	8.82132	0.976595	3.35294	0.610204	0.123966	0.550914	0.0926714	0.447425	0.10828	0.29583	0.0496653	0.246584	0.0421479	0.3041	0.0630012	0.00962145	0.227457	1.14361
Iona-1	130.74	5.27551	2.79285	31.5278	0.246858	1.63974	0.00972751	1.40188	25.7681	0.564143	0.816337	0.152179	87.9617	51.2728	4.48237	801.216	131.965	64.858	1.26915	799.654	6.7593	82.0446	32.6578	6.40406	30.5607	10.5577	7.02648	59.4366	0.166603	2.16201	15.1838	27.9698	3.29274	12.6357	2.34616	0.539556	2.15213	0.318009	1.84168	0.400739	1.01427	0.16762	0.946687	0.139854	1.61102	0.448238	0.575149	1.25849	0.516584
Iona-1	132.45	1.82398	0.965615	9.60613	0.0509125	0.395526	0.0385858	2.19917	44.9465	0.230471	0.116405	0.0606118	35.7926	16.2547	0.904033	683.088	33.3877	19.1775	0.514355	125.729	1.36454	11.2231	7.69262	2.58692	3.64131	4.53169	1.08523	10.0212	0.367868	0.275332	6.80261	10.4507	1.14694	4.36479	0.745133	0.170707	0.766408	0.108279	0.574824	0.135604	0.343006	0.0579428	0.320075	0.0469375	0.562433	0.0929526	0.0171048	0.303774	1.78934
Iona-1	132.76	3.35695	1.77717	33.2828	0.129416	1.01038	0.00778201	0.578842	29.726	0.410601	0.517331	0.128151	75.1569	29.9588	3.08972	844.085	134.608	48.4086	0.96581	432.086	4.4256	64.6804	29.7991	8.33507	16.5026	12.7407	4.07072	54.3537	0.63175	1.04037	17.6898	38.5623	4.70875	17.7397	3.40043	0.487735	2.73302	0.424338	2.36351	0.473601	1.27177	0.212112	1.2803	0.189666	1.05062	0.262333	0.204188	1.16721	0.59229
Iona-1	133.68	7.12443	3.77167	30.7786	0.305579	2.07506	0.0119973	1.04797	25.3225	0.691096	0.734907	0.158456	106.58	47.9382	3.39828	827.315	100.791	84.177	1.24074	610.009	6.09338	61.5538	27.8378	7.20381	23.0042	11.2821	6.47818	53.2675	0.316434	1.33703	14.8187	24.6888	2.85042	10.7951	1.99776	0.436929	1.73519	0.296549	1.67046	0.381512	1.02115	0.171759	1.04435	0.154223	1.91512	0.376974	0.631808	1.53533	0.687591
Iona-1	134.65	0.652475	0.34542	11.5356	0.0259248	0.295712	0.0179419	0.858138	44.8118	0.0966862	0.0881888	0.0392894	344.817	9.61587	0.504979	776.898	21.8766	17.5306	0.444354	116.512	1.35463	49.9336	7.94519	1.06802	2.69396	2.59379	0.773918	12.7071	0.214683	0.203197	2.87101	4.42737	0.54879	2.06251	0.389685	0.123966	0.371024	0.0653577	0.333276	0.0809574	0.192634	0.0393184	0.21564	0.0373584	0.305117	0.0495747	0.0630739	0.453417	0.568243
Iona-1	135.25	0.656113	0.347346	2.95984	0.0192614	0.358316	0.0195631	0.840049	50.6658	0.10688	0.0498878	0.0380988	27.1959	7.37366	0.371926	494.733	15.014	11.5489	0.327686	138.953	1.00681	7.8969	3.91986	0.624289	1.50825	1.97362	0.395267	6.35869	0.323143	0.15443	2.35206	3.68205	0.453937	1.72423	0.326248	0.0731602	0.290448	0.0497499	0.260913	0.0586941	0.143492	0.0331102	0.163422	0.0229898	0.3041	0.0330498	0.0534525	0.342681	0.768642
Iona-1	136.14	4.33078	2.29272	29.0544	0.206565	2.33315	0.00713351	0.705759	26.3483	0.500561	0.750463	0.227835	69.9799	62.9385	4.5476	703.527	255.227	52.6321	1.09059	938.406	8.71148	137.284	47.7377	5.26565	23.7953	11.421	3.42098	98.5417	0.405885	1.41628	11.9872	20.9216	2.66652	10.5364	2.08537	0.489767	1.96849	0.320936	1.77747	0.390619	1.05457	0.164516	0.966994	0.144644	1.30183	0.256136	0.359201	2.70703	0.361609
Iona-1	136.88	4.95229	2.62174	27.0018	0.203338	1.94757	0.00907901	0.804953	27.4258	0.542073	0.779967	0.164518	92.1223	59.6144	4.46166	827.21	323.963	62.0188	1.189	799.253	6.87821	114.268	44.8883	6.14088	26.0369	12.4431	4.02088	79.1429	0.362278	1.55649	12.9343	22.2685	2.81654	10.9543	2.17096	0.490783	1.96942	0.325813	1.9701	0.444253	1.16366	0.192453	1.13525	0.180087	1.50626	0.335662	0.298265	2.32395	0.56468
Iona-1	137.31	0.65102	0.34465	10.8377	0.0237383	0.306284	0.0338301	0.613939	46.8529	0.101205	0.0974154	0.0476235	41.4921	9.74549	0.511191	947.539	19.4091	12.135	0.557979	150.474	1.47949	19.1668	7.7213	0.755879	3.07737	3.66842	0.715328	15.2383	0.299662	0.223516	3.52118	4.69876	0.583634	2.25552	0.412844	0.0975469	0.422555	0.0751126	0.433156	0.103221	0.279122	0.0548388	0.292999	0.0507691	0.250196	0.0475091	0.0630739	0.424985	0.855036
Iona-1	137.85	2.76975	1.4663	26.2834	0.124418	1.4853	0.00778201	0.538634	32.1194	0.336825	0.515937	0.141788	246.312	43.4538	3.17462	822.808	168.315	55.5522	0.993202	570.036	6.46697	99.3274	37.4778	3.66209	17.3951	11.4706	3.01872	88.3965	0.267236	1.03427	11.5926	18.9672	2.3026	8.94548	1.71179	0.3973	1.67336	0.269235	1.58688	0.379488	0.999532	0.162447	1.084	0.154223	1.02214	0.173511	0.239467	1.78673	0.245823
Iona-1	138.65	8.14503	4.31198	30.7068	0.355659	2.99858	0.0151317	1.35961	22.152	0.705809	0.887145	0.21528	85.1404	94.3085	5.66172	652.796	191.778	86.9152	1.23668	1441.62	10.2068	128.831	43.6486	7.9046	30.1955	12.4431	6.02432	122.562	0.140886	1.95882	14.4932	27.9394	3.50084	14.2077	2.77512	0.597475	2.57	0.388245	2.18209	0.459433	1.1902	0.189349	1.07917	0.16955	2.46738	0.452369	0.525972	2.25062	0.660871
Iona-1	139.27	1.04138	0.551308	7.1071	0.0457067	0.638481	0.0295068	0.894119	49.9302	0.124746	0.143763	0.0601788	47.429	12.8365	1.04682	878.78	26.1396	19.5009	0.422035	172.413	2.87278	23.2609	9.19691	1.04354	4.78341	4.01373	1.02577	18.0769	0.0737973	0.331211	3.72146	6.24206	0.729784	2.95695	0.623294	0.136159	0.573401	0.0907205	0.539152	0.114352	0.317452	0.0631163	0.314273	0.0469375	0.383431	0.0568043	0.00106905	0.857452	0.977057
Iona-1	139.86	3.17611	1.68143	26.6118	0.148261	1.80765	0.00713351	0.578547	27.5191	0.349016	0.520657	0.193633	80.2199	54.6282	3.83626	705.099	259.964	47.378	1.10784	938.506	8.4786	194.418	46.7016	5.12692	18.8963	13.7032	3.30905	180.052	0.2527	1.2334	14.1577	25.8229	3.19014	12.5661	2.51734	0.545653	2.3011	0.385318	2.19126	0.485744	1.29929	0.197626	1.21841	0.185834	0.996716	0.187971	0.406239	3.15147	0.12113
Iona-1	140.39	3.92857	2.07979	20.5259	0.172936	1.75893	0.0136185	1.60145	32.6168	0.454215	0.430752	0.178913	91.3243	41.3841	3.23261	900.896	112.027	45.5997	0.874505	541.284	6.37481	78.6431	30.4744	3.7641	14.3624	12.3934	3.55653	68.6902	0.0659703	0.897114	13.2303	22.9774	2.87558	11.8099	2.34717	0.535492	2.07436	0.332642	1.86716	0.402763	1.06931	0.171759	1.00664	0.158055	1.04757	0.219988	0.383789	1.78972	0.475614
Iona-1	141.15	4.81406	2.54856	25.37	0.230304	1.60138	0.00832243	0.908865	27.861	0.378443	0.666888	0.135835	121.683	73.4753	3.95534	760.442	218.105	56.9869	1.19103	915.565	7.19433	124.554	43.5468	8.02905	25.5501	9.05049	3.96054	91.7373	0.148713	1.62049	11.2374	20.2634	2.54553	9.78322	2.04308	0.456235	1.70334	0.280941	1.57159	0.328889	0.84228	0.135545	0.820978	0.118781	1.58051	0.352187	0.533456	1.95882	0.179023
Iona-1	141.77	0.706831	0.374196	3.87735	0.0244672	0.55836	0.0190227	0.868853	49.0495	0.0738809	0.0699502	0.0430777	49.2243	8.59146	0.613077	795.346	19.1007	10.7608	0.295221	113.807	1.43887	17.5068	6.51676	0.679373	2.16957	2.47373	0.526439	15.9044	0.0592615	0.215389	2.39744	3.96053	0.452002	1.77298	0.334303	0.0823052	0.335421	0.0624313	0.3027	0.0718497	0.186737	0.037249	0.210805	0.0316109	0.278674	0.0382138	0.0106905	0.534224	0.45691
Iona-1	142.27	3.15741	1.67153	35.6433	0.143159	1.50395	0.00637692	0.535783	26.5244	0.334513	0.534497	0.116461	77.5791	53.7293	3.25849	782.558	177.348	81.5095	0.987115	522.45	6.87227	105.611	43.1952	4.81886	18.805	11.8675	2.99336	64.1095	0.171076	1.14705	11.632	18.5115	2.31615	9.12756	1.72186	0.407462	1.72114	0.296549	1.73772	0.402763	1.08504	0.190384	1.17006	0.172423	1.29777	0.16938	0.330336	2.18927	0.279668
Iona-1	142.71	2.17007	1.14883	18.4528	0.0827719	0.843189	0.00951135	0.542271	38.6055	0.271877	0.308554	0.15824	63.15	30.9414	2.54508	1165.56	105.704	31.8884	0.708126	244.244	3.38906	52.4389	29.0127	3.49785	9.27774	7.89747	1.63004	28.919	0.251582	0.565903	8.85869	15.6862	1.97545	7.56849	1.47718	0.313979	1.28547	0.226313	1.26482	0.280315	0.730238	0.11899	0.708807	0.111117	0.755674	0.11051	0.132562	1.24203	0.838113
Iona-1	143.37	14.041	7.43331	38.2295	0.894144	4.27451	0.0226975	1.62308	12.05	1.26218	1.12114	0.203482	134.982	104.636	5.03425	782.244	174.264	154.491	1.42335	1477.69	13.1599	89.9884	48.1448	9.42452	27.6496	11.421	11.7706	78.4563	0.466265	1.67028	22.238	37.3673	4.14641	15.4315	2.89394	0.651329	2.46881	0.370686	2.09953	0.445265	1.2187	0.198661	1.15846	0.172423	4.39267	0.603159	1.97881	2.62323	1.93007
Iona-1	144.21	0.533475	0.282422	12.0384	0.0185326	0.235803	0.0235622	0.74115	44.8429	0.0823935	0.0686628	0.0357177	21.7434	8.57682	0.33113	810.754	15.4656	8.77841	0.298265	126.33	1.0841	11.7323	4.92827	0.479438	2.47995	1.52611	0.578034	14.0701	0.101751	0.202181	1.72754	2.39495	0.307787	1.18597	0.222533	0.0579185	0.248286	0.0380441	0.183455	0.0435146	0.125802	0.026902	0.130544	0.0191581	0.205446	0.0464763	0.0331405	0.22596	0.554883
Iona-1	144.63	3.62717	1.92023	24.9903	0.18897	1.76515	0.0100518	0.614135	30.3166	0.357214	0.518619	0.286932	83.4781	60.0953	2.74492	787.589	136.591	46.9233	0.906969	878.998	7.61647	119.258	38.6158	3.93037	18.3181	10.3394	3.24521	131.888	0.171076	1.12469	12.0563	21.7014	2.95688	11.9989	2.41061	0.572072	2.22427	0.343372	1.7367	0.358236	0.911078	0.131406	0.713642	0.10537	1.07605	0.171446	0.289712	1.61764	0.406142
Iona-1	145.75	2.22203	1.17634	17.8268	0.0993262	1.57755	0.00853859	0.447698	38.0356	0.211449	0.330118	0.263769	60.4618	37.7777	2.39702	1042.61	182.856	29.908	0.722329	687.45	5.24512	97.5553	27.7267	2.60018	10.6704	8.8302	1.45427	89.2266	0.023481	0.690869	8.94354	15.5545	2.15838	8.72859	1.7128	0.432864	1.6162	0.25948	1.43808	0.292458	0.769551	0.11692	0.667226	0.0967486	0.71194	0.111543	0.149667	1.5473	0.689373
Iona-1	146.46	3.7893	2.00606	29.1057	0.149302	2.29065	0.00832243	0.566652	27.861	0.304877	0.502955	0.270155	58.0015	53.4993	3.09076	732.561	173.493	43.3465	0.99726	1130.05	8.82147	138.914	40.0497	4.80458	17.1517	12.0461	2.69778	163.143	0.521054	1.10742	11.8195	22.0052	2.96656	12.2676	2.60998	0.525331	2.33764	0.374588	2.05265	0.446277	1.09192	0.16762	0.966027	0.126444	1.18792	0.227217	0.300403	2.15785	0.417721
Iona-1	146.7	0.682199	0.361156	10.0577	0.0164503	0.257984	0.0162125	0.659947	47.0291	0.0686262	0.059329	0.0355012	17.4403	7.67994	0.611524	703.003	15.9062	8.71678	0.337831	104.29	1.20896	11.9156	4.12524	0.908891	2.0225	3.72696	0.477468	14.3775	0.0849787	0.192021	2.93908	4.92661	0.624285	2.32318	0.442045	0.0701118	0.445978	0.089745	0.464751	0.10828	0.333177	0.0589775	0.313306	0.0450216	0.279691	0.0423451	0.0630739	0.523749	0.956571
Iona-1	147.23	7.20238	3.81294	28.8286	0.368361	4.54918	0.0201035	0.601158	25.105	0.392315	0.474095	0.366052	54.4013	63.3671	3.69752	686.756	128.99	74.7297	1.06929	1138.07	11.8023	84.1324	27.8285	4.82804	14.5754	13.6437	8.29448	165.193	0.337679	0.962137	14.3649	28.4964	3.67021	14.9838	3.03994	0.685877	2.72646	0.417509	2.42975	0.467529	1.20691	0.181071	1.09174	0.170508	2.16328	0.325334	0.856309	3.51959	1.86059
Iona-1	147.86	3.1387	1.66163	25.3495	0.143471	1.85325	0.0118892	0.539912	32.6375	0.258215	0.282912	0.137892	39.1648	44.2796	3.0804	936.114	109.636	31.171	0.76088	858.06	8.30618	97.0563	31.3811	2.58692	9.77272	10.7066	2.63307	154.125	0.153185	0.721349	8.87842	15.19	1.91157	7.97144	1.59398	0.364785	1.69397	0.269235	1.55936	0.357224	0.948425	0.139684	0.810341	0.125486	0.821782	0.100182	0.317508	2.98836	0.320638
Iona-1	148.23	3.25614	1.7238	27.2995	0.15888	2.22225	0.00832243	0.447797	28.4516	0.226687	0.387408	0.203482	91.0394	42.8057	3.04002	852.366	164.24	38.9512	0.995231	850.847	10.9897	130.868	40.4383	3.5203	14.1393	10.2998	2.27891	234.774	0.187848	0.973313	10.0337	18.7545	2.49908	9.99912	2.16592	0.475541	1.99753	0.322887	1.70103	0.367344	0.898301	0.141753	0.787133	0.111117	0.958068	0.135298	0.372029	2.87314	0.0187039
Iona-1	148.9	4.33286	2.29382	18.8428	0.15357	2.18389	0.0139428	0.599291	35.0827	0.219015	0.388696	0.378715	67.5861	42.1263	3.57637	944.919	138.133	46.6808	0.766967	690.255	6.43922	80.7207	28.7352	3.31832	11.3804	14.7253	2.26054	159.147	0.395822	0.792467	16.2986	32.3749	4.14254	16.7746	3.34907	0.793585	2.95507	0.46921	2.46237	0.526223	1.31993	0.183141	1.13042	0.180087	1.17979	0.181774	0.235191	2.34041	0.829207
Iona-1	149.49	0.254526	0.134746	1.6667	0.00843336	0.173613	0.00778201	0.933344	50.6865	0.0481329	0.0246757	0.0583388	123.108	5.09383	0.232247	1029.51	7.45633	3.82439	0.238409	39.2814	0.987981	5.96188	5.51574	0.232578	0.915907	1.97561	0.318312	6.01847	0.152067	0.140206	1.74727	2.49824	0.331984	1.19591	0.221526	0.0558863	0.2258	0.0429215	0.247664	0.0576821	0.150372	0.0341449	0.148917	0.0249056	0.134252	0.0216889	0.0117595	0.338192	0.448894
Iona-1	149.57	2.56085	1.35571	19.1712	0.0922464	1.25312	0.00832243	0.472079	34.4507	0.143348	0.361982	0.199586	67.0446	40.1402	2.53991	917.352	158.291	31.363	0.824794	713.698	6.67209	120.582	34.1473	3.28976	13.4495	10.6074	1.89676	206.593	0.194557	0.973313	9.54536	17.7925	2.38099	9.69268	2.12363	0.387139	1.96193	0.31996	1.7897	0.377464	0.941546	0.148996	0.906074	0.127402	0.810595	0.140462	0.96749	2.60528	0.454238
Iona-1	150.15	5.47194	2.89684	29.8755	0.207919	2.12171	0.00961943	0.80918	24.7734	0.226162	0.796167	0.170471	95.086	73.5276	4.56935	760.337	364.72	59.7656	1.19205	1340.44	8.216	156.736	53.2886	6.28165	30.6621	14.4375	3.64922	268.694	0.338797	2.38553	14.582	27.6154	3.7612	15.332	3.27657	0.687909	3.05439	0.463357	2.70901	0.55051	1.45851	0.211078	1.2716	0.193497	1.45338	0.27989	0.376305	3.36845	1.07592
Iona-1	150.5	1.58806	0.840717	8.08311	0.0534113	0.422268	0.0174014	0.698386	48.3035	0.065053	0.202448	0.0425365	253.436	13.6205	1.41647	763.691	21.2928	16.8132	0.51334	220	1.6648	12.6896	5.10868	1.68721	9.49886	4.96631	1.21903	18.1691	0.404767	0.755892	6.38429	9.68917	1.11791	3.96483	0.711905	0.181884	0.735489	0.111206	0.679801	0.163939	0.435391	0.0920877	0.585032	0.0910012	0.466829	0.108445	0.0117595	0.585102	1.12758
Iona-1	151.85	7.85714	4.15957	34.7401	0.284444	2.99962	0.0102679	1.02831	15.9561	0.265992	1.13079	0.208353	130.803	69.1059	6.09039	554.478	235.179	92.8867	1.42741	1524.77	16.4003	148.181	40.0497	9.07565	49.2338	15.1222	5.90714	215.714	0.431603	4.19093	18.923	38.6433	4.76296	18.8839	3.81327	0.787488	3.42354	0.525788	2.81603	0.604144	1.48898	0.229702	1.40504	0.214571	2.29957	0.385237	0.654258	5.62057	1.29324
Iona-1	152.75	1.29289	0.684458	9.82986	0.0482055	0.492024	0.0257239	1.21018	44.9879	0.0512857	0.118873	0.0483812	38.3479	11.9271	0.984072	601.855	16.9747	22.1178	0.457542	177.322	1.64697	14.37	5.67209	1.57908	4.13629	6.03101	1.09573	14.9411	0.177784	0.306827	7.22784	10.6431	1.18469	4.6175	0.834751	0.16461	0.871344	0.134617	0.841852	0.188226	0.544485	0.0972612	0.556022	0.0900433	0.59803	0.0795261	0.0962145	0.664413	1.33599
Iona-1	152.97	9.60733	5.08612	18.8531	0.400637	2.53008	0.0256158	1.11286	31.2905	0.123695	0.531815	0.272861	59.5404	35.3526	5.48363	545.883	103.666	139.032	0.735517	540.182	6.2767	30.8788	11.7494	11.0475	16.3606	22.4054	10.7474	57.633	1.02645	0.949945	23.9349	53.7421	6.84971	26.9827	5.5885	0.935841	4.70057	0.741371	4.09511	0.870292	2.26443	0.341449	2.27727	0.341015	3.9533	0.706439	0.648913	1.86455	3.58403
Iona-1	153.05	9.1968	4.86879	19.2328	0.241236	1.96001	0.024643	0.820682	33.3835	0.1176	0.449312	0.142871	78.643	24.6068	3.57948	473.455	83.5518	119.43	0.649284	273.297	4.84081	28.7095	12.1842	11.6187	16.2794	16.0946	6.30153	46.2376	1.25679	1.20089	15.1443	30.4306	3.74087	15.332	3.08425	0.537524	2.71147	0.440921	2.63257	0.578845	1.60397	0.270055	1.72802	0.260551	3.72548	0.803523	0.408377	1.54281	5.38227
Iona-1	154.7	0.313246	0.165833	0.925308	0.0109321	0.0860291	0.0199954	0.517203	52.0956	0.0532825	0.027787	0.0284659	32.2209	3.51331	0.172192	519.784	2.80562	3.63241	0.202901	4.66849	0.724388	0.766877	3.0937	0.283582	1.00314	0.983339	0.401388	0.174211	0.109578	0.117854	0.994494	1.37621	0.186802	0.749188	0.153054	0.0375962	0.159278	0.0273137	0.128418	0.0263111	0.0737118	0.0227633	0.0705906	0.00957907	0.137303	0.0237545	0.0352786	0.0269357	0.460472
Iona-1	157.23	5.29941	2.80551	27.2789	0.235926	1.32257	0.0191308	4.77584	29.353	0.152491	0.89959	0.205864	47.524	32.0285	3.65921	466.118	34.3791	46.1958	0.907983	37.5783	6.38868	14.0441	8.92029	7.18136	42.2555	9.94254	4.08909	0.414006	1.06559	2.76043	10.5172	18.1368	2.62103	11.3821	2.11557	0.47859	2.0575	0.286794	1.61338	0.339009	0.819675	0.127267	0.721378	0.119738	1.37201	0.315006	0.647844	0.335199	7.74075
Iona-1	159.435	21.0147	11.1252	33.1904	0.538902	3.40903	0.0190227	3.58434	13.3244	0.179815	1.00044	0.249699	30.2451	22.9133	2.81533	348.409	98.4557	132.363	0.786243	52.1749	9.31001	23.8923	17.8646	14.2097	32.0212	10.3692	14.1666	4.71598	1.58329	2.161	15.1739	27.7571	3.40889	13.0635	2.40557	0.517202	2.11371	0.304352	1.62459	0.339009	0.85604	0.126233	0.755223	0.119738	4.92154	2.21021	0.824237	1.09538	24.8049
Iona-1	161.79	0.511857	0.270977	2.63553	0.0226972	0.367748	0.0351271	8.12326	42.5738	0.0636868	0.0807861	0.04968	10.7055	5.56213	0.488101	632.881	5.96154	5.27938	0.242467	7.01275	1.4785	2.45543	3.42028	0.722217	3.64233	2.35664	0.619135	0.0204954	0.153185	0.291587	1.97024	3.09166	0.438451	1.95306	0.40781	0.0823052	0.35697	0.0595048	0.339391	0.0678018	0.18084	0.0434571	0.150851	0.0229898	0.208497	0.0289186	0.0662811	0.0538713	0.769532
Iona-1	165.5	0.529422	0.280276	2.53392	0.0246754	0.194032	0.0342625	0.797776	50.0027	0.0580117	0.0697357	0.0573647	241.277	6.51232	0.656565	533.934	2.53244	4.13256	0.231308	6.06503	1.07221	1.01843	0.975108	0.646731	3.06824	3.60293	0.453857	0.0420155	0.0335442	0.249932	2.52471	3.7985	0.572019	2.57589	0.482323	0.138191	0.476897	0.0721862	0.452521	0.103221	0.26438	0.0475959	0.214673	0.0316109	0.1729	0.0309842	0.0780406	0.02095	0.585165
Iona-1	166.87	0.833314	0.441157	4.18831	0.0336293	0.197867	0.0313442	0.604108	49.1945	0.0631613	0.102243	0.0445929	318.03	7.24614	0.899373	610.555	6.2909	5.62999	0.28812	7.62086	1.20005	1.5144	1.77536	0.974177	4.36146	4.35408	0.60252	0.0491889	0.0849787	0.357626	3.28637	5.10788	0.715266	3.1052	0.583017	0.187981	0.591202	0.0926714	0.536095	0.125484	0.329246	0.0548388	0.267857	0.0373584	0.216633	0.0444107	0.0363477	0.0194535	0.823863
Iona-1	171.51	0.584817	0.309602	2.72071	0.0237383	0.179728	0.0279936	0.599192	49.9613	0.0457158	0.0887252	0.0429694	28.0223	5.93008	0.493796	494.942	5.34688	5.48348	0.271888	7.84126	0.994918	2.59597	2.65333	0.76302	3.72449	2.64043	0.634001	0.0194706	0.272826	0.270252	2.24649	3.42382	0.478135	1.82969	0.382636	0.0833213	0.347601	0.0634068	0.35366	0.0748856	0.178874	0.0382837	0.192432	0.0268214	0.239008	0.0382138	0.0587977	0.0299285	0.83366
Iona-1	174.51	1.93622	1.02504	5.78215	0.0613241	0.352512	0.0314523	0.729156	46.3867	0.0634766	0.25019	0.0917835	29.4852	10.2044	1.81925	484.67	7.94982	11.9026	0.306381	20.1366	2.07605	5.70829	5.76183	1.88307	10.5791	6.44975	1.19367	0.350471	0.509872	0.623814	5.94427	9.04917	1.26793	4.98563	1.01801	0.225577	0.990334	0.166809	0.92033	0.201381	0.540553	0.0796714	0.496068	0.0689693	0.440386	0.105346	0.0256572	0.070332	1.56578
Iona-1	177.45	0.663804	0.351418	2.44361	0.0264454	0.226371	0.0317765	0.550234	49.723	0.0521265	0.0996684	0.0436188	32.2684	7.18551	0.570314	505.005	3.19997	5.91694	0.284062	11.2104	1.11383	2.75994	2.89387	0.748739	4.20019	2.67218	0.529063	0.0174211	0.0268354	0.277364	2.59772	3.56964	0.454905	1.89038	0.387671	0.0863697	0.330736	0.0702352	0.309834	0.0738736	0.201479	0.037249	0.187597	0.0287372	0.210531	0.0330498	0.0898002	0.0314249	0.660871
Well X	5315.75	4.41861	2.33921	18.6952	0.211648	1.59229	0.0155517	0.750869	40.869	0.865844	0.645506	0.0923362	179.297	31.4045	4.73152	1293.8	47.0461	41.6864	0.623909	51.7588	5.6977	19.046	19.4951	4.60103	22.3607	10.0453	3.99675	0.810942	0.578052	1.32102	10.2985	17.8679	2.17127	8.56688	1.73905	0.417291	1.7062	0.260753	1.50687	0.320385	0.86365	0.132081	0.841507	0.130555	1.15108	0.226791	0.815711	0.19494	2.42746
Well X	5318	3.82374	2.02429	16.0719	0.195452	1.66611	0.0166828	0.670344	42.8397	0.804198	0.532661	0.118255	165.752	22.0756	4.63306	1274.49	24.931	40.8741	0.599199	37.9156	4.43847	11.1902	15.51	3.8273	16.6488	7.8759	3.0854	0.487142	0.457088	0.847662	7.77012	13.2745	1.61943	6.44893	1.28004	0.349921	1.38741	0.205441	1.17969	0.25828	0.654877	0.1099	0.629652	0.104249	0.913267	0.171088	0.441221	0.215282	1.59645
Well X	5318.65	4.99712	2.64548	16.2829	0.245245	1.85805	0.014892	0.822857	41.0903	0.880683	0.741236	0.0811317	129.962	25.9312	4.85235	1428.97	50.0291	47.8801	0.679504	57.5745	5.54683	17.9105	19.2047	5.16508	23.2647	8.66863	3.96723	1.19527	0.319267	1.30642	9.76286	17.3917	2.19174	8.2317	1.63105	0.410252	1.62399	0.255814	1.35242	0.28884	0.763203	0.112925	0.75775	0.116915	1.39388	0.273542	0.323695	0.327161	1.2133
Well X	5319.7	4.62916	2.45068	17.67	0.229377	1.84215	0.0153632	0.732846	40.8795	0.797027	0.684967	0.0708721	159.189	22.0635	4.66887	1253.03	29.6368	47.3725	0.672298	37.2718	5.64238	14.3181	16.0507	4.65025	21.1985	8.19952	4.28807	0.599559	0.8061	1.09372	9.46651	17.0941	2.06012	8.00922	1.53004	0.384109	1.5438	0.241986	1.25386	0.271095	0.736614	0.119982	0.69173	0.110095	1.16606	0.258622	0.304771	0.233928	2.32477
Well X	5321	3.56207	1.88576	18.3736	0.169844	1.19706	0.0127241	0.611741	41.3643	0.741854	0.507652	0.0635824	184.184	21.1391	3.90247	1524.45	35.0885	32.8866	0.584786	31.7989	3.75656	11.2521	18.3136	3.65897	17.6323	7.79573	3.35211	0.551518	0.772389	1.09164	9.02543	15.4472	1.92655	7.34178	1.44304	0.376065	1.48164	0.218282	1.17562	0.252365	0.673588	0.111916	0.628667	0.0964547	0.915265	0.212866	0.211149	0.179684	1.09939
Well X	5321.3	3.54776	1.87819	16.9363	0.169734	1.46168	0.0130069	0.674981	40.869	0.774021	0.495045	0.0569676	321.589	19.2173	3.73688	1494.41	46.1589	33.7327	0.561106	35.0078	4.67784	14.2561	21.8081	3.63337	17.6919	8.22031	3.19465	1.0646	0.660348	1.09164	9.08549	15.4571	1.99967	7.2575	1.43504	0.389136	1.48164	0.231122	1.19899	0.268138	0.734644	0.1099	0.700599	0.107172	0.92226	0.212866	0.203181	0.296648	0.972539
Well X	5322.45	3.36889	1.78349	13.2173	0.109764	1.85124	0.0247885	0.568949	44.547	0.528729	0.476187	0.0657423	66.4264	8.20143	2.37751	906.624	21.2151	29.4569	0.494185	19.7523	2.67535	2.47237	10.9941	3.03487	12.8641	6.39137	3.06473	0.920477	0.684144	0.603685	8.63062	14.1376	1.64088	6.01083	1.15703	0.28054	1.11374	0.17186	0.921598	0.202089	0.532765	0.0877182	0.614871	0.0935318	0.807352	0.253648	0.100594	0.145781	1.59127
Well X	5323.1	4.37057	2.31378	19.0169	0.209897	1.65476	0.0140437	0.632294	39.8151	0.804994	0.621113	0.0913912	149.414	21.0418	4.41601	1299.16	32.2084	43.4012	0.611554	32.4739	4.50787	8.67033	20.2861	4.15608	19.9071	8.82797	3.87176	0.527497	0.626636	1.03012	10.1606	17.2429	2.22197	8.41497	1.66305	0.399192	1.59592	0.2489	1.40729	0.28884	0.783883	0.118974	0.780414	0.115941	1.11111	0.219829	0.138442	0.206806	2.69066
Well X	5324.45	3.89528	2.06216	20.4843	0.205082	1.55027	0.0128184	0.672241	38.4873	0.65999	0.612196	0.0764068	129.892	30.5045	4.25826	1469.74	66.384	45.9397	0.738189	64.792	4.96449	18.0034	23.3601	4.39726	22.8475	8.67952	4.38944	1.6805	0.758508	1.55665	9.96371	16.2607	2.09912	7.68579	1.48304	0.324783	1.52174	0.232109	1.34226	0.278981	0.738583	0.113933	0.746911	0.108146	1.20903	0.283489	0.22808	0.472942	1.74401
Well X	5326	5.06152	2.67957	21.6302	0.233973	2.21013	0.0154575	0.990759	35.7894	0.828199	0.735496	0.0630424	144.247	25.6758	5.0034	1439.7	68.004	51.4226	0.747455	60.7626	7.1108	17.064	26.0235	5.45449	26.8011	10.6391	4.42487	1.77177	0.792219	1.81314	11.5193	20.4177	2.67241	10.0556	1.88705	0.470584	2.02498	0.30915	1.68469	0.364746	0.965082	0.158296	0.945956	0.143221	1.38589	0.285479	0.25298	0.474637	1.04244
Well X	5326.7	2.30589	1.22074	11.0262	0.101775	1.05759	0.0145149	0.535537	45.5587	0.534505	0.29139	0.0757319	125.899	10.1305	3.14055	1845.22	28.3254	41.5736	0.641411	50.8346	3.59764	6.49423	11.0542	2.4777	9.18865	11.4011	1.96442	0.981009	0.341081	0.549468	9.27945	16.102	1.97432	7.69657	1.58205	0.334838	1.66108	0.278531	1.57088	0.350945	1.03303	0.162329	0.999166	0.152964	0.699439	0.109417	0.0129478	0.345807	0.922488
Well X	5327.4	2.88134	1.52538	17.8509	0.119503	2.8132	0.0222437	0.575273	41.5856	0.466484	0.423095	0.0677672	81.1304	11.6654	2.73106	1057.78	18.965	37.7039	0.716568	19.3576	3.54132	4.86525	9.21386	3.28195	14.076	9.44553	3.65819	1.88803	0.894345	0.780933	9.4675	15.348	1.88073	7.05658	1.41604	0.290595	1.3844	0.224208	1.27825	0.279967	0.781914	0.125024	0.722277	0.114966	0.913267	0.184019	0.0687229	0.228843	2.35757
Well X	5329.33	4.23769	2.24343	30.033	0.190308	1.46963	0.0149862	0.705126	34.2613	0.622842	0.650836	0.0502179	135.632	21.2607	4.26497	1158.62	29.0068	38.3808	0.723775	30.1996	4.31778	8.59187	15.7002	4.87075	21.5461	9.28422	5.78205	0.699486	0.977632	1.14794	10.6135	18.2846	2.17419	8.04744	1.53204	0.360982	1.48766	0.240011	1.31381	0.276024	0.807518	0.125024	0.814902	0.121786	1.11411	0.319298	0.187245	0.25088	3.13508
Well X	5330.45	3.09701	1.63956	18.5947	0.139858	1.15277	0.0157402	0.728841	40.9849	0.548547	0.443594	0.0788367	134.515	18.0011	3.16628	1422.53	36.3871	41.2803	0.741277	55.8298	3.74147	10.6431	15.6401	3.35282	14.6025	8.28662	3.70051	1.13763	0.687119	0.8706	9.35821	14.7229	1.87488	6.93113	1.38504	0.336849	1.41247	0.207417	1.21423	0.251379	0.71101	0.110908	0.697643	0.097429	0.911269	0.187003	0.0796788	0.3136	1.37899
Well X	5332.3	3.00604	1.5914	21.198	0.16864	1.36628	0.0158345	0.585497	38.9826	0.654811	0.399829	0.0859915	175.666	19.3876	3.10475	1544.83	42.6488	39.4075	0.701125	51.9146	4.89006	13.6884	20.6466	4.13049	14.076	7.51169	4.20146	1.62092	0.739669	0.905007	9.18197	14.5741	1.69353	6.38915	1.10703	0.252386	1.24907	0.17186	1.02016	0.217862	0.638136	0.0957842	0.58531	0.0935318	0.880293	0.239723	0.124498	0.471247	2.08574
Well X	5333.65	5.57973	2.95391	38.4961	0.278185	1.79218	0.0144207	1.28799	26.1886	0.814854	0.811342	0.0788367	145.923	35.2115	6.25984	955.866	57.4222	59.0717	0.842174	109.562	5.86365	18.6847	24.0309	6.83066	30.4567	10.0255	5.13742	1.18759	0.837829	2.03522	10.8006	20.497	2.47351	9.51756	1.90305	0.477622	1.79842	0.279519	1.59629	0.343059	0.937508	0.152246	1.00409	0.142246	1.53277	0.36406	0.296803	0.417003	1.94767
Well X	5334.4	5.58484	2.95662	36.9984	0.309702	2.30099	0.0147977	0.970733	27.2425	0.946513	0.732114	0.0988159	163.099	34.4453	5.52701	1104.98	52.9992	53.8821	0.818494	84.5028	6.44498	16.8369	19.6753	5.83151	27.4467	9.01997	7.26423	1.1799	0.866583	1.73077	10.6923	19.9216	2.43549	9.01478	1.66805	0.423324	1.62901	0.266679	1.41339	0.313485	0.810472	0.128048	0.789282	0.119838	1.48781	0.455572	0.306763	0.418698	2.26523
Well X	5335.7	7.19978	3.81157	26.7161	0.22872	2.3998	0.0200759	1.44398	30.8783	1.19908	0.864433	0.197362	264.337	22.0026	4.82438	1132.88	55.6607	62.9527	0.774223	138.744	7.21038	19.397	19.3048	6.22428	25.0527	10.2729	4.52526	3.11886	0.817999	1.50661	12.2183	22.7987	2.77673	10.8593	2.08906	0.582196	1.96383	0.284457	1.50179	0.3263	0.910919	0.131073	0.822785	0.137375	1.7396	0.366049	0.143422	0.713651	2.16858
Well X	5336.7	5.68194	3.00802	44.0443	0.308608	4.83366	0.0154575	1.0286	24.7343	0.800811	0.762862	0.0656073	223.563	44.5648	7.975	898.685	23.9923	48.0606	0.798932	60.2746	8.44848	20.3054	14.3385	6.36505	27.6057	8.79432	6.3263	1.35381	1.82339	1.57751	10.5348	20.0307	2.41696	9.00694	1.92005	0.477622	1.7894	0.28347	1.53735	0.316442	0.844939	0.128048	0.852346	0.123735	1.29796	0.358092	0.855551	0.308514	1.7863
Well X	5337.65	4.25609	2.25317	22.2232	0.191293	3.01763	0.0351563	3.94723	34.1348	0.615672	0.596002	0.0618274	96.6863	14.2671	5.2831	1180.08	39.0743	47.0566	0.771135	78.4483	6.5345	13.7916	16.9618	4.80283	19.1521	9.89584	4.25658	1.66993	1.00639	1.13439	9.88495	18.7112	2.32726	8.92657	1.93106	0.452484	1.82449	0.289396	1.59933	0.342073	0.922737	0.147205	0.942015	0.147118	1.25499	0.291447	0.473093	0.530577	1.10975
Well X	5338.45	1.59961	0.846834	17.0468	0.057563	2.3521	0.0524046	0.584864	43.6196	0.328352	0.196686	0.0469781	51.6107	11.6387	1.43881	756.432	9.72809	19.7996	0.61979	11.9012	1.89789	4.42755	4.77815	1.7463	6.51848	4.1438	1.49398	0.858984	0.450147	0.36805	4.66877	7.86646	0.903802	3.36756	0.723021	0.187027	0.725785	0.104696	0.573078	0.118296	0.306266	0.0524292	0.30448	0.0477402	0.391686	0.115385	0.248996	0.0813664	0.425432
Well X	5340.25	4.23871	2.24398	32.7166	0.193372	3.62865	0.0441103	5.30794	27.2425	0.578126	0.561154	0.0457631	359.432	22.8784	4.63306	889.566	49.0519	47.4514	0.800992	66.1005	5.33864	18.5402	19.4851	5.1828	19.7183	11.8861	4.33629	1.54406	0.437257	1.23344	12.4842	22.2729	2.67143	10.0164	1.91805	0.423324	1.92273	0.28742	1.60645	0.362775	0.977884	0.154263	1.02971	0.145169	1.18705	0.323277	0.327679	0.547528	1.29183
Well X	5341.1	11.5295	6.1037	39.6118	0.661428	6.34191	0.0382667	1.09616	19.9708	1.66815	1.26375	0.0773518	141.734	296.044	25.6659	820.049	106.32	73.7945	0.901888	167.095	25.265	78.6719	32.9524	11.1433	41.2148	13.9644	9.61346	0.850336	0.809075	2.48147	12.2971	21.8959	2.66851	9.78218	2.19706	0.521865	2.14628	0.37335	2.3929	0.526417	1.50474	0.23089	1.54802	0.237727	2.08633	0.553053	0.391422	0.269526	0.966499
Well X	5341.75	3.60807	1.91011	33.8826	0.21515	4.07954	0.0460897	4.18227	27.8537	0.585695	0.464707	0.0419833	223.563	52.8963	6.37396	997.276	48.049	40.1295	0.714509	69.5795	10.5304	27.5006	19.1346	5.17295	16.1422	16.9038	3.23893	3.27355	0.46502	0.990503	11.923	20.884	2.62268	10.4183	2.16006	0.476617	2.42296	0.387178	2.38274	0.526417	1.52148	0.225849	1.56477	0.249418	0.904274	0.201924	0.218121	0.82214	1.0597
Well X	5342.65	2.90894	1.53999	23.7711	0.171704	4.16472	0.0536299	5.70108	31.7214	0.633698	0.355244	0.121225	195.774	20.9201	4.8076	1073.87	41.2859	34.3645	0.602288	53.7008	7.10678	22.8036	14.779	3.69834	12.8144	7.67697	2.65925	1.29424	0.736694	0.793445	6.34645	11.1513	1.38251	5.36006	1.15203	0.323778	1.16085	0.191614	1.04048	0.221805	0.636166	0.0917512	0.603047	0.0964547	0.701437	0.168104	0.155374	0.56787	0.525534
Well X	5343.9	16.5378	8.75513	44.758	1.26836	7.16418	0.0363816	2.57703	9.48165	2.10735	1.76392	0.123115	359.152	234.135	45.6705	582.316	125.259	90.2886	0.98837	371.679	34.0454	35.0158	70.7611	15.6616	48.2081	15.8349	8.97572	2.15995	0.835846	2.91938	8.73499	17.2727	2.33994	9.88901	2.48107	0.77224	2.72069	0.495825	2.85421	0.649642	1.72238	0.274245	1.69385	0.263058	2.53796	0.576926	0.977061	0.559394	0.251117
Well X	5344.8	19.8086	10.4867	48.5875	1.57368	7.13011	0.0353448	1.59576	7.33176	2.84034	1.95763	0.149169	189.63	304.923	68.6289	502.714	133.077	87.6374	0.704214	455.798	45.833	53.0501	95.8734	19.9929	44.0956	16.4188	7.38135	0.992539	1.00242	2.60867	5.33728	12.8975	1.91485	9.03046	2.72508	0.90899	3.14473	0.57089	3.41103	0.687103	1.79525	0.255088	1.57167	0.236752	2.52797	0.465519	0.255968	0.311905	0.40127
Well X	5345.65	16.824	8.90664	42.9287	1.19832	5.28114	0.0290299	1.42395	12.1406	2.77062	1.50666	0.11191	101.504	410.983	47.4047	715.773	120.579	67.3413	0.622879	387.672	43.2783	58.0052	94.1512	14.1063	32.4335	11.8861	5.56849	1.73334	0.611764	1.99352	4.55554	9.98065	1.42834	6.74883	1.96706	0.653588	2.11119	0.401006	2.27707	0.498815	1.28513	0.192577	1.21989	0.179269	1.9964	0.387933	0.132466	0.367844	0.104416
Well X	5349.3	3.46395	1.83382	24.7661	0.236271	2.28282	0.0687103	0.898851	38.3713	0.615871	0.312196	0.0696571	34.2535	97.899	10.3547	686.7	47.0847	16.9228	0.349018	68.8422	11.7172	37.5552	27.1149	3.33609	9.41812	10.837	1.80302	0.588029	0.683153	0.48691	4.47678	6.70866	0.797529	3.21074	0.829024	0.299645	1.00848	0.193589	1.33312	0.309541	0.890239	0.154263	0.928219	0.153938	0.456633	0.0994699	0.0737028	0.147477	0.460813
Well X	5350.15	9.47195	5.01445	30.636	0.589966	4.94496	0.0439218	2.2935	25.609	1.40224	1.03929	0.0926062	156.256	392.618	25.1848	1070.76	73.9828	48.0494	0.697007	214.035	32.6373	112.624	43.3157	8.50314	30.1686	14.7166	4.81559	3.99322	0.630603	1.84442	8.55284	16.0921	2.10985	8.92363	2.00906	0.641522	2.21044	0.39508	2.3929	0.538247	1.40035	0.224841	1.41696	0.224087	1.27298	0.329245	0.0976065	1.40357	0.502234
Well X	5350.8	5.2271	2.76723	25.6004	0.333997	3.95574	0.0579655	3.5309	31.6582	0.804198	0.62388	0.0518379	70.2665	121.75	16.0328	1144.68	35.4228	35.6506	0.632145	104.681	16.6958	82.3057	37.0677	5.4604	21.0296	14.6374	3.608	1.87074	0.81899	1.2105	8.18462	14.2467	1.7686	7.03208	1.62805	0.486672	1.82348	0.330879	1.96411	0.46234	1.33142	0.206692	1.21398	0.190961	0.964226	0.223807	0.062747	1.02556	1.3367
Well X	5352.1	3.26566	1.72884	25.9723	0.192825	2.40093	0.0548552	0.758563	38.7823	0.636586	0.290878	0.101111	60.1706	103.81	12.777	569.765	42.0959	17.3628	0.307836	55.2067	11.4457	34.799	19.7855	2.84586	8.57078	14.7562	1.75578	0.140281	0.601849	0.469185	7.32313	11.9847	1.34644	5.34536	1.18603	0.352938	1.61196	0.293347	2.02914	0.500787	1.44664	0.249039	1.76086	0.276698	0.441646	0.101459	0.062747	0.0915372	1.23401
Well X	5353.25	3.29224	1.74291	24.4747	0.1473	2.84841	0.0637149	2.95647	37.0119	0.422963	0.467885	0.1138	66.7197	39.9672	4.29518	860.064	26.8853	33.5748	0.670238	58.3429	6.10302	17.4976	13.4874	3.50048	17.9104	9.49898	3.61095	0.203696	0.711907	0.974863	9.23908	15.0404	1.79395	6.83998	1.38704	0.35696	1.36937	0.208405	1.23354	0.269123	0.708055	0.107883	0.643447	0.0993776	0.860309	0.208887	0.0139438	0.12205	2.46716
Well X	5353.8	4.78759	2.53455	23.4494	0.24426	4.87569	0.058908	5.89291	30.8256	0.493673	0.737648	0.11299	100.624	55.4262	5.60421	899.865	59.3123	48.7263	0.885415	88.5529	9.27623	31.1859	25.0522	5.27632	28.46	10.3719	6.19442	0.212344	0.770406	1.62338	12.6614	21.9852	2.52323	9.71554	1.83705	0.485666	1.80444	0.275568	1.4896	0.315456	0.911904	0.130065	0.771545	0.118863	1.25599	0.350134	0.112546	0.25088	4.39412
Well X	5354.95	12.4392	6.58529	34.1339	0.524524	5.41516	0.0305379	2.06373	16.5668	1.4371	1.51896	0.143634	173.432	96.3664	11.1793	708.263	67.3226	106.602	1.0903	152.556	19.3611	58.511	38.069	10.4247	48.983	14.6968	11.5936	0.859945	1.53685	2.9371	19.1299	36.7776	4.38056	16.8378	3.11509	0.818494	3.16177	0.458292	2.6012	0.551062	1.44171	0.217783	1.40809	0.207524	3.21142	0.830574	0.911326	0.562784	9.19037
Well X	5355.9	3.75934	1.9902	19.3787	0.149817	3.36857	0.0448644	5.93823	27.1371	0.464692	0.5466	0.0448182	78.6449	16.724	3.7257	1013.26	27.2453	34.0937	0.725834	47.3764	3.8863	14.8549	20.0858	4.27126	20.1157	11.0152	4.18375	0.483298	0.782304	1.2595	11.7753	20.2192	2.38966	8.95892	1.71705	0.439412	1.7483	0.265691	1.55056	0.34503	0.942432	0.13309	0.918366	0.141272	0.930253	0.273542	0.501976	0.283087	3.50183
Well X	5356.8	5.32727	2.82026	22.1528	0.232879	2.26692	0.0246	2.29034	29.5399	0.678912	0.792073	0.0915262	134.892	24.496	4.76173	1086.75	36.7343	51.4452	0.861735	76.6413	7.31095	14.9684	27.2451	5.88467	32.1752	12.2622	7.50142	0.280563	0.784287	1.87257	15.5658	28.9498	3.45044	13.0351	2.48207	0.557058	2.28261	0.365449	2.02508	0.393334	1.07538	0.16737	1.0307	0.167578	1.48581	0.394896	0.464129	0.284782	5.96123
Well X	5357.7	7.59637	4.02152	27.6006	0.346254	2.27373	0.0172483	1.68218	24.9556	0.87909	1.11206	0.097466	186	37.6927	6.50598	1046.95	56.9465	76.9873	1.02337	114.754	7.75752	29.08	35.3956	8.14974	46.3803	12.8758	10.5307	0.734076	1.20568	2.86412	17.8697	32.9778	4.03932	15.3775	2.98409	0.598285	2.77683	0.401994	2.27097	0.451497	1.21522	0.201651	1.20018	0.175372	2.26019	0.609751	0.528868	0.572955	5.59447
Well X	5358.75	6.0264	3.19037	22.5348	0.263411	2.10791	0.0216782	1.8582	28.7706	0.61617	0.920293	0.0527828	143.828	27.6584	5.04815	1121.08	35.9628	57.5374	0.946158	96.7363	8.28856	17.1053	27.4954	6.66725	38.5725	11.9257	8.69129	0.700446	0.833863	2.31778	16.0089	27.8387	3.33734	12.4666	2.40507	0.534937	2.22848	0.336805	1.88994	0.402207	1.08424	0.154263	1.0376	0.156861	1.72362	0.502323	0.317719	0.274612	3.59676
Well X	5360	4.97259	2.63249	17.4087	0.204972	2.13176	0.0239402	2.28296	30.2355	0.584101	0.702186	0.100031	164.914	19.6187	4.39364	1192.95	43.5359	48.1283	0.775253	69.5587	6.57171	20.2745	24.2112	5.26155	28.7481	9.91662	5.80371	1.96298	0.772389	1.82461	12.4645	22.888	2.80988	10.7515	2.01406	0.46455	1.96684	0.291371	1.56987	0.330243	0.909935	0.128048	0.840521	0.131529	1.33693	0.350134	0.248	0.452601	1.90021
Well X	5361	4.85505	2.57026	17.3484	0.185712	2.08066	0.0246	2.37466	30.6886	0.566972	0.680047	0.103541	747.35	18.597	4.38916	1225.14	30.5497	45.5561	0.787607	66.4536	6.38967	19.7583	23.0597	5.07353	27.5461	10.1838	5.45826	1.60555	0.860634	1.72869	12.5826	23.2948	2.87423	10.9377	2.12706	0.495722	2.1142	0.320015	1.69993	0.347002	0.890239	0.139139	0.857273	0.132503	1.33193	0.317309	0.212145	0.391576	2.01153
Well X	5362	3.58456	1.89767	14.9562	0.150911	1.55368	0.0298782	1.4482	34.9568	0.410514	0.514314	0.0657423	121.388	13.6224	2.95818	1138.24	22.7709	35.4927	0.815405	49.9415	4.7754	7.31491	26.0736	4.13738	20.8707	6.96044	4.75555	0.257503	1.04803	1.18026	9.55315	16.479	1.98992	7.50546	1.48104	0.291601	1.35032	0.194577	1.03642	0.223777	0.613517	0.0917512	0.621769	0.0954804	1.03517	0.256632	0.0886426	0.157647	2.49995
Well X	5363	6.48328	3.43225	21.3085	0.269868	2.22262	0.0201701	1.3976	28.7495	0.702117	0.942124	0.0982759	149.973	25.8583	5.24394	1123.22	44.8346	56.3077	1.04602	88.9579	9.75297	15.0407	44.0467	7.55222	38.4135	11.4407	7.403	0.563048	1.00242	2.3574	15.3886	28.3149	3.35489	12.6626	2.38607	0.569125	2.29063	0.339769	1.86555	0.386434	1.07538	0.161321	0.979459	0.162706	1.73461	0.462535	0.270908	0.266136	3.49579
Well X	5363.4	6.52519	3.45443	21.208	0.244479	2.16924	0.0202644	1.35544	29.287	0.704806	0.914963	0.0862614	134.961	21.8567	5.09738	1174.72	43.896	56.7138	0.998666	77.7214	8.37104	13.678	34.6346	7.47741	34.8175	11.4902	7.27997	0.594755	0.848735	1.98309	15.5166	29.0391	3.43971	12.9371	2.48407	0.565102	2.32472	0.337793	1.87673	0.392349	1.07045	0.164346	1.05829	0.158809	1.71462	0.439657	0.22808	0.264441	3.74518
Well X	5365	6.46284	3.42143	24.0626	0.286064	2.33392	0.0198874	1.93725	25.9884	0.776113	0.939356	0.0931462	125.983	23.3162	6.22851	1168.28	51.1862	59.8389	0.961602	104.577	10.0678	21.8436	23.6705	7.87313	37.2215	11.3913	6.35386	2.4482	0.77338	2.69208	12.9075	24.029	2.8791	11.1043	2.09506	0.483655	1.96583	0.310138	1.85641	0.369675	1.03697	0.16737	1.02281	0.163681	1.61171	0.420758	0.355566	0.779761	1.47391
Well X	5366	7.29178	3.86027	27.48	0.369454	2.46908	0.017154	1.18048	24.924	1.03077	0.99665	0.0949011	147.459	35.7832	7.17392	1058.1	72.1056	66.1793	1.05632	212.996	8.59231	37.0701	27.8859	8.30429	38.9102	12.6976	6.39815	4.18731	1.06191	2.6264	13.9413	26.0727	3.16477	12.153	2.42207	0.571136	2.34276	0.365449	2.1084	0.441639	1.19355	0.178461	1.16569	0.170501	1.93045	0.44662	0.366522	0.839091	1.45147
Well X	5366.55	8.1064	4.29153	29.2188	0.353476	2.29304	0.0141379	1.16994	23.3116	1.09152	1.11616	0.105431	128.747	41.8524	7.05645	981.827	100.932	80.5185	1.05426	286.003	7.31699	38.1953	27.1549	9.36054	43.0625	14.8255	7.04672	5.50076	0.890379	2.96108	17.535	33.2854	3.96035	14.9364	2.80108	0.717942	2.78986	0.419772	2.35734	0.497829	1.34422	0.200643	1.31251	0.201678	2.47102	0.501328	0.432257	1.27983	1.81046
Well X	5367.65	9.41369	4.98361	33.762	0.384337	2.29531	0.0141379	1.48509	20.8455	1.03475	1.37444	0.0751919	138.801	36.2454	7.37195	774.562	62.9253	90.0065	1.3796	107.381	8.42635	28.729	27.0748	11.5173	57.8339	14.7265	11.2393	1.92935	0.835846	4.02457	20.3902	39.3571	4.6555	17.3866	3.17409	0.648561	3.12869	0.468169	2.48943	0.529375	1.46633	0.211733	1.45244	0.227984	2.97761	0.754977	0.466121	0.464467	3.12386
Well X	5369.4	7.65156	4.05074	30.8873	0.34494	1.8819	0.0157402	1.16994	24.2811	0.969319	1.08336	0.12217	123.455	29.0328	6.66821	904.371	45.1946	78.5329	1.16854	78.3964	6.9187	24.4037	24.8219	9.93247	45.0492	16.0032	9.93037	1.1751	0.75355	3.08516	19.9373	38.3451	4.41176	16.4163	3.3271	0.707886	3.02945	0.476071	2.62559	0.541204	1.51459	0.221816	1.4889	0.218241	2.27617	0.551063	0.398394	0.352588	2.64665
Well X	5370.05	8.53671	4.51934	31.7718	0.34122	2.25215	0.0141379	1.04241	23.1746	0.87899	1.12846	0.0754619	171.756	31.587	6.49927	816.294	57.6536	86.701	1.1809	86.6005	7.43969	23.774	28.6969	9.36644	44.4035	13.1331	10.5209	0.685073	1.30681	2.87976	18.4407	36.599	4.19922	15.5833	2.83308	0.636494	2.52621	0.381252	2.23643	0.464312	1.23885	0.191568	1.2258	0.187064	2.70883	0.668438	0.387438	0.3831	4.89117
Well X	5371.8	8.48969	4.49444	31.2994	0.373065	2.20672	0.0137609	1.18997	22.9427	0.928985	1.21865	0.12568	176.085	36.7197	7.12805	857.919	66.7954	85.821	1.22208	107.173	8.24129	22.7313	31.6708	9.962	51.5756	14.6473	12.253	0.748488	1.08571	3.47927	21.0892	41.9862	4.76373	17.4846	3.3561	0.761179	3.09661	0.464219	2.49248	0.524446	1.44664	0.211733	1.34109	0.201678	2.39608	0.700268	0.445205	0.398356	3.72879
Well X	5373.65	8.43246	4.46414	34.0233	0.363982	1.63772	0.0102736	0.983908	21.6043	1.00288	1.23505	0.135939	155.279	60.3522	7.56663	736.263	92.4207	82.3462	1.23649	197.315	6.75677	41.7567	35.5057	9.56923	54.9531	16.4089	10.8752	1.80829	0.923099	3.89632	20.4591	38.6527	4.55898	16.8182	3.3351	0.697831	3.08258	0.470145	2.5758	0.530361	1.45058	0.224841	1.40711	0.219215	2.3681	0.64357	0.437237	0.335636	2.48442
Well X	5374.8	9.97381	5.28013	36.6266	0.432489	2.25897	0.00951954	1.054	18.2846	1.06662	1.50666	0.10975	942.146	74.4733	8.6284	692.278	133.077	92.0937	1.45888	223.07	9.30238	50.1287	36.8574	11.2712	65.8106	17.2799	13.7982	3.08043	1.38911	4.63242	23.9543	44.8336	5.17809	18.9744	3.5061	0.828549	3.35625	0.505702	2.77191	0.574722	1.57564	0.220808	1.54703	0.230907	2.62689	0.798743	0.490024	0.444125	3.02203
Well X	5375.95	11.6521	6.16863	37.1191	0.516316	2.89725	0.0153632	1.27534	15.9661	1.56159	1.63478	0.155514	220.211	80.3479	9.67226	604.845	127.741	89.0137	1.46196	440.636	10.3796	50.9236	35.8361	12.738	71.0655	15.3401	14.5659	22.1664	0.819982	5.09848	20.272	38.9106	4.87195	18.5823	3.6621	0.932117	3.32818	0.494837	2.6012	0.543176	1.41316	0.21375	1.35291	0.198755	2.6129	0.819632	1.3147	1.09675	1.28751
Well X	5377	5.75247	3.04536	22.5046	0.220075	1.30836	0.0115931	0.81959	28.8971	0.646645	0.84004	0.101651	221.328	56.6912	5.06717	1339.93	61.228	44.5294	0.955424	471.479	4.70198	38.4533	22.9696	6.00476	35.7016	10.3917	6.79477	13.4613	0.803126	2.46166	13.6164	25.0211	3.05167	11.2317	2.21806	0.468572	1.96283	0.298285	1.6664	0.348973	0.975915	0.14418	0.910483	0.135426	1.20303	0.375002	0.644402	0.747554	1.51188
Well X	5378.9	6.49555	3.43874	23.0273	0.257173	1.37083	0.0101793	0.859958	28.1172	0.545261	1.05261	0.0595325	233.477	66.166	5.95104	1282	87.5476	55.4051	1.21384	583.845	4.95946	44.0071	25.3727	7.89183	47.5724	9.85328	9.20503	16.3053	0.477909	3.19359	14.2662	25.3485	2.98245	10.5163	2.02206	0.449468	1.8295	0.285445	1.49366	0.325314	0.8863	0.147205	0.906541	0.137375	1.53077	0.520228	0.589623	0.917067	1.60249
Well X	5380.35	6.04377	3.19957	20.4843	0.247105	1.52756	0.0130069	0.93026	29.2448	0.589579	0.947556	0.0951711	194.797	45.2945	5.29317	1419.32	78.9202	53.0247	1.06044	428.07	5.93305	43.8729	25.4528	7.01967	41.2744	9.31094	7.51618	17.6217	0.798168	2.72753	13.3703	23.8305	2.81963	10.4869	1.93806	0.466561	1.84253	0.273593	1.50484	0.318414	0.861681	0.135106	0.88979	0.132503	1.37989	0.400864	0.534844	1.33916	1.4601
Well X	5381.5	9.00791	4.76879	29.2791	0.349208	1.79786	0.0136667	1.17626	23.1956	0.744244	1.41749	0.0845065	527.976	75.6896	7.24888	930.869	87.3933	75.9494	1.47123	458.913	6.45806	40.6625	26.424	10.8972	61.2212	12.1632	12.1054	12.8175	1.02522	4.20807	19.1595	37.105	4.45758	16.2987	3.12209	0.663643	2.77182	0.405944	2.22728	0.432766	1.22506	0.184511	1.22482	0.191935	2.38908	0.702258	0.62249	0.893335	2.94955
Well X	5383.3	6.30441	3.33756	28.7866	0.266366	1.31404	0.0113103	0.883146	25.6195	0.620452	0.981071	0.0923362	278.022	71.8704	5.16115	1124.3	74.6771	62.806	1.1356	608.977	5.53878	45.153	29.2877	8.70986	43.1022	12.4007	10.1272	15.2676	1.08868	2.91104	18.5392	30.7158	3.51868	12.6136	2.22406	0.586218	2.18537	0.340756	1.79646	0.389391	1.06258	0.171403	1.09179	0.172449	1.41387	0.48044	0.467117	0.842481	1.98995
Well X	5385	5.04005	2.6682	23.9922	0.211429	1.16639	0.0120644	0.920247	28.3491	0.491183	0.805192	0.0858565	118.233	59.3913	4.57489	1423.61	62.8867	49.9447	1.10368	467.325	4.6185	39.9812	23.2199	6.20361	36.3771	10.5401	8.01811	15.4117	0.813041	2.50128	14.3942	25.0112	2.92102	11.0357	2.10706	0.475611	1.89666	0.295322	1.58816	0.335172	0.942432	0.134098	0.867126	0.128606	1.17805	0.402853	0.415326	1.01538	1.89848
Well X	5386.3	5.35282	2.83378	24.0726	0.210335	1.22204	0.0115931	0.823384	28.0645	0.537592	0.833275	0.103946	348.4	68.027	4.87249	1417.17	138.22	47.4966	1.0347	651.243	5.19984	50.4694	25.7331	6.56783	38.4632	11.7574	7.8134	23.1464	0.78627	2.62327	15.8612	28.2454	3.36464	12.1432	2.48707	0.538959	2.12222	0.348658	1.82897	0.391363	1.01531	0.160312	1.02281	0.160758	1.27198	0.387933	0.345607	1.04929	1.69655
Well X	5389.7	4.92864	2.60922	22.7961	0.208474	1.11426	0.0135724	0.955872	28.9708	0.501341	0.779056	0.097196	100.261	64.3173	3.95953	1362.46	79.4345	48.196	0.994547	527.87	4.57626	43.8213	27.3953	6.0845	35.2248	9.29708	8.6096	20.6195	0.722813	2.37721	13.6853	23.5726	2.7543	10.1242	1.83405	0.419302	1.71522	0.245937	1.44794	0.309541	0.781914	0.121999	0.774501	0.127632	1.25299	0.421752	0.308755	0.995043	1.37208
Well X	5391.4	7.32653	3.87866	28.3243	0.300728	1.80581	0.0110276	0.986965	23.691	0.616966	1.12026	0.100166	245.626	88.8863	5.98796	1206.9	147.22	65.6716	1.33739	740.658	6.36553	51.192	29.6882	10.0014	53.1253	12.1137	10.9539	25.3179	0.869557	3.64922	18.8149	34.466	4.07929	15.1716	2.79608	0.650572	2.63348	0.385203	2.06674	0.418965	1.18075	0.177453	1.17259	0.170501	1.75759	0.52918	0.445205	1.15269	1.39883
Well X	5392.3	3.41489	1.80784	17.7504	0.144236	0.899043	0.0176253	0.718933	32.4697	0.403344	0.526101	0.0916612	83.5741	40.5753	2.81609	1279.85	45.3103	35.5152	0.922479	437.936	3.63084	32.786	23.7205	4.46616	22.9468	7.37512	4.69552	16.3534	0.479892	1.5358	9.6201	16.0226	1.90608	7.21339	1.27004	0.320761	1.29318	0.202478	1.03947	0.219833	0.661771	0.0967924	0.630637	0.101326	0.879294	0.241712	0.177285	0.7662	1.15376
Well X	5395.75	6.56403	3.475	27.1382	0.283	1.49576	0.0099908	0.858588	24.6184	0.703909	1.01807	0.147414	141.175	107.155	5.59638	1052.2	147.863	61.6327	1.1356	958.743	6.11006	62.0828	39.5008	7.54828	45.7247	11.322	8.91667	34.196	0.732728	3.2916	15.3394	26.8168	3.40169	12.545	2.48607	0.513821	2.17936	0.333842	1.83405	0.389391	1.0675	0.162329	1.01198	0.161732	1.58373	0.467509	0.498988	1.23067	1.15376
Well X	5397.3	6.08159	3.21959	24.7762	0.25772	1.46282	0.00857701	0.768576	26.02	0.570358	0.968875	0.11704	186	93.7028	5.30772	1089.97	157.635	58.361	1.21178	929.146	5.9602	61.9796	35.3054	7.75992	47.3439	10.7183	9.78176	37.5589	0.633577	3.4261	15.428	27.0847	3.35879	12.2118	2.39707	0.505777	2.23951	0.325941	1.75175	0.355874	0.988717	0.148213	0.998181	0.156861	1.4918	0.455572	0.434249	1.23575	1.31081
Well X	5401	5.19439	2.74991	20.9869	0.231675	1.8308	0.0116874	0.704599	28.7706	0.610593	0.75046	0.0992209	165.333	63.0158	4.13631	1196.17	155.32	44.7212	1.02337	679.075	5.94713	52.8127	29.538	6.45364	34.3904	9.09123	8.60862	26.5574	0.593917	2.37408	12.6811	21.8662	2.69191	10.0262	1.93106	0.431368	1.80043	0.26174	1.4835	0.311513	0.796685	0.12704	0.726218	0.115941	1.17006	0.336208	0.396402	1.01878	1.06056
Well X	5404.45	3.96581	2.0995	20.1929	0.172032	1.61841	0.00942529	0.681516	29.5505	0.482021	0.589442	0.0946311	183.626	69.8271	3.37662	1148.97	78.7916	48.4781	0.883356	597.968	3.95067	42.8923	25.5429	4.66993	25.3607	9.16051	6.08518	22.2529	0.430317	1.76622	11.4701	18.9196	2.41014	9.03536	1.68005	0.396175	1.72023	0.2489	1.39307	0.298698	0.792746	0.118974	0.840521	0.128606	1.19104	0.305373	0.237044	0.683139	1.03553
Well X	5406.25	8.66857	4.58914	31.8723	0.365405	2.94722	0.0111218	0.889154	19.2542	0.955078	1.233	0.121495	173.432	138.778	6.7745	682.194	144.648	87.5809	1.44137	1095.62	7.23954	68.0186	39.8413	10.5526	55.0922	13.1034	11.0523	39.6343	0.764457	4.02353	17.5251	33.335	4.14267	15.6813	3.06309	0.677721	2.66956	0.421748	2.28215	0.473184	1.23393	0.193585	1.26817	0.192909	2.43505	0.680374	0.670298	1.19507	1.09076
Well X	5410.5	5.11569	2.70825	30.5054	0.208912	1.39808	0.00772874	0.651055	23.7331	0.565378	0.736111	0.134589	127.63	69.8392	4.03897	958.869	192.093	61.2604	1.00896	892.799	6.64513	76.8448	39.2705	7.60538	35.0758	11.3418	7.31934	41.1044	0.878481	2.67436	15.9006	28.6919	3.43679	13.2213	2.47307	0.563091	2.24652	0.356559	1.93058	0.399249	1.07932	0.159304	0.984385	0.167578	1.53976	0.391911	0.995984	1.84939	1.17447
Well X	5413.45	4.57192	2.42038	27.7312	0.191074	1.09325	0.00933103	0.583705	26.3151	0.493274	0.655243	0.0919312	118.009	79.2654	3.96512	919.819	78.5987	57.12	0.900858	599.63	4.46965	53.1224	33.5031	7.02852	28.1123	11.5694	6.85284	26.8168	0.814032	1.9956	17.1313	30.7852	3.69125	13.5447	2.57307	0.556053	2.37484	0.358535	1.93363	0.397278	1.1	0.166362	1.14007	0.166604	1.54476	0.371023	0.589623	1.07132	1.92264
Well X	5417.05	5.5552	2.94092	20.9567	0.252686	1.389	0.0102736	0.645996	28.4017	0.666264	0.684557	0.196957	121.64	82.3913	4.11281	1126.44	105.355	50.8134	0.921449	899.445	5.64942	55.6928	28.4266	6.05201	28.301	11.8168	6.345	30.7274	0.572103	2.07693	14.473	26.2116	3.41534	13.1821	2.52907	0.61739	2.51719	0.346682	1.96513	0.374604	0.99561	0.15023	0.894717	0.144195	1.43385	0.377986	0.524884	1.4273	1.71899
Well X	5421.45	4.1273	2.18499	23.3389	0.19961	1.45941	0.0109333	0.631135	28.2542	0.685186	0.501605	0.125815	161.563	43.3606	3.41354	1117.86	88.1134	50.678	0.876149	664.329	6.54858	60.9989	28.1462	5.64841	23.513	10.0057	5.66887	36.5308	0.755533	1.64423	11.9131	19.743	2.49984	9.50776	1.78505	0.459523	1.81546	0.27458	1.52109	0.336158	0.905011	0.139139	0.848404	0.128606	1.23401	0.283489	0.397398	1.97992	1.05193
Well X	5429.6	8.09414	4.28504	39.1092	0.291536	1.92393	0.00942529	0.7378	17.4204	1.14231	0.809189	0.12649	93.3768	107.447	6.11999	549.167	178.721	74.4038	1.04294	799.957	7.18221	87.0439	49.764	10.5329	31.6487	15.5281	9.09185	46.7925	0.874515	2.39285	20.3114	38.7916	4.90997	18.5333	3.6081	0.664649	3.39836	0.534345	2.9355	0.590494	1.6111	0.245006	1.66429	0.245521	2.06234	0.566979	0.64739	1.73921	1.42041
Well X	5435.8	4.74671	2.51291	23.4394	0.18024	1.07849	0.00810575	0.675824	28.3912	0.561494	0.576118	0.0855865	143.549	50.0016	4.14861	992.019	293.54	53.9611	0.924538	894.979	5.11334	74.2434	32.1814	6.75191	23.3044	10.2729	6.11864	41.9787	0.752559	1.84338	13.833	26.162	3.32661	12.6038	2.48907	0.535942	2.1553	0.339769	1.74362	0.369675	0.973945	0.145189	0.913439	0.143221	1.50279	0.430705	0.38445	1.62394	1.4601
Well X	5446.7	8.62155	4.56425	30.4953	0.43227	2.79389	0.0147034	1.12146	21.8045	1.15326	0.737853	0.193852	183.765	68.6473	6.29117	853.199	112.839	83.9031	1.18501	963.001	9.73587	98.5438	31.9912	8.17829	28.6885	15.4094	11.6724	51.1451	0.44519	2.152	20.3705	37.105	4.57166	17.024	3.3281	0.771234	3.2119	0.496813	2.62661	0.547119	1.43187	0.215766	1.37755	0.22019	2.53397	0.564989	1.241	2.23758	1.1598
Well X	5452.8	4.483	2.3733	22.6956	0.197312	1.63204	0.0082	0.560095	28.1067	0.450649	0.547522	0.189937	547.665	72.3934	4.10498	1042.12	167.921	52.4606	0.992488	776.071	6.36452	82.6876	30.1388	5.98803	25.3309	14.2415	6.6747	47.6284	0.708932	1.77561	15.8907	27.5014	3.65128	13.9956	2.85208	0.593257	2.80891	0.415821	2.28621	0.4929	1.28809	0.193585	1.23763	0.191935	1.41387	0.41479	0.522892	2.38844	0.792184
Well X	5454.3	5.27616	2.7932	22.8162	0.230471	2.06362	0.00867126	0.925095	26.705	0.662479	0.546702	0.206946	315.585	59.9508	4.24931	853.199	141.948	61.3958	0.993518	609.392	7.46785	104.16	44.6575	6.21641	24.1885	11.8267	6.37847	64.9907	0.272666	1.75892	14.0792	24.902	3.38609	12.6626	2.59407	0.598285	2.34777	0.36051	1.9631	0.412065	1.06061	0.164346	1.0238	0.151989	1.48481	0.365055	0.614522	2.21893	0.123401
Well X	5454.6	0.764543	0.404749	8.96567	0.0282343	0.717554	0.0151747	0.654112	39.3514	0.169803	0.0728731	0.0417133	2802.56	5.14854	0.662905	847.942	19.4665	14.531	0.394318	105.512	1.42417	13.2341	9.53026	0.756009	2.93441	2.03083	1.01666	9.03182	0.390656	0.245019	2.39641	3.3831	0.441664	1.7465	0.36401	0.18401	0.36189	0.0533358	0.2967	0.0630912	0.169382	0.0282311	0.140908	0.0263058	0.259791	0.0576926	0.0786828	0.527186	0.360711
Well X	5456.65	4.56988	2.41929	30.9275	0.209897	1.69564	0.00735172	0.679408	23.849	0.54297	0.556439	0.221661	763.967	83.6198	3.77604	731.972	124.41	54.8072	1.0069	589.349	5.96322	85.8568	42.775	6.07564	25.2216	13.9743	5.51928	42.9108	0.623662	1.88613	14.7782	24.8623	3.37439	13.2017	2.56707	0.624428	2.47208	0.385203	2.10433	0.439667	1.19454	0.175436	1.10756	0.174398	1.42885	0.365055	0.462137	1.92398	1.08817
Well X	5458	1.44936	0.767291	18.263	0.0582196	0.565593	0.0112161	0.64568	34.9568	0.183845	0.196788	0.0656073	87.6376	13.963	1.24302	937.843	32.0798	22.2139	0.586845	239.686	2.66831	31.2272	12.3859	1.79552	7.94495	5.60754	1.58847	16.8434	0.210201	0.570321	5.88863	9.53916	1.15047	4.59266	0.813023	0.211159	0.837058	0.132352	0.732605	0.170543	0.4658	0.0725943	0.454256	0.0730718	0.507593	0.102454	0.0866506	1.15608	1.02345
Well X	5463.35	4.62099	2.44635	28.0026	0.207599	1.83647	0.0082	0.653901	24.9134	0.526139	0.571506	0.172928	454.386	71.2988	4.12288	780.677	117.069	54.0175	0.992488	550.821	6.15633	79.952	36.0564	5.26549	25.1719	14.8353	5.24076	45.8509	0.666297	1.79854	14.2958	25.1104	3.42021	13.2017	2.64208	0.655599	2.64751	0.408908	2.26589	0.485014	1.3196	0.199634	1.25832	0.200704	1.41586	0.366049	0.390426	2.07654	0.661879
Well X	5471.75	5.3334	2.8235	27.5503	0.23452	1.88758	0.0099908	0.773003	24.2179	0.586093	0.685582	0.218961	550.737	78.2924	4.45405	869.291	141.948	54.2205	1.0244	569.098	6.50935	82.7599	36.557	6.56783	33.0493	13.2519	5.59014	37.0785	0.849727	2.21247	14.2859	24.4556	3.23984	12.7214	2.46807	0.604318	2.43699	0.376313	2.05658	0.43671	1.20438	0.187535	1.14106	0.183167	1.40487	0.407827	0.412338	1.6714	0.693808
Well X	5476.35	7.29893	3.86405	35.0184	0.299087	2.42137	0.00829425	0.90528	18.5165	0.663774	1.01961	0.165098	118.386	103.202	5.8772	609.673	137.448	66.7998	1.32092	587.272	8.12462	105.192	47.3509	8.16648	47.8406	14.9046	7.81143	56.9869	0.672246	3.21027	17.1608	31.6186	4.08514	15.7695	3.09409	0.653588	2.88309	0.423723	2.37461	0.52346	1.40626	0.211733	1.36868	0.205575	1.95743	0.555042	0.594603	1.99009	0.426295
Well X	5482.25	5.80971	3.07566	28.9474	0.246449	2.11473	0.0099908	0.827389	22.7741	0.563884	0.789613	0.166718	1044.78	92.5351	4.58719	790.332	153.392	66.5967	1.23649	765.686	7.45981	117.786	48.202	6.87988	36.5857	13.3409	7.35871	69.6795	0.652416	2.57114	14.8176	25.1798	3.30711	12.4666	2.56307	0.575158	2.35279	0.367424	2.01898	0.437695	1.20438	0.19056	1.25635	0.187064	1.72561	0.494366	0.475085	1.99517	0.211422
USGS Portland-1	145.24	3.18883	1.68816	12.9506	0.0610514	0.871874	0.034276	0.682151	39.5481	0.241153	0.260379	0.0632413	156.748	5.87724	1.48862	1021.6	13.5949	25.3666	0.381519	16.1884	4.48774	6.82328	12.8085	3.70209	9.14325	15.4833	1.09437	1.02166	0.725326	0.646084	24.8633	39.7875	4.70141	17.1075	3.18575	0.516074	2.77624	0.427239	2.54366	0.547931	1.5231	0.25128	1.67001	0.255787	0.634802	0.389568	0.504537	0.0633093	6.13184
USGS Portland-1	145.92	6.71515	3.555	25.7569	0.244703	1.60094	0.0255728	1.16132	31.5893	0.39832	1.03847	0.0873124	288.93	28.5217	5.63147	898.365	27.4319	50.6219	0.911706	48.3282	10.1191	13.5968	22.1733	6.80584	40.8877	12.8851	2.56071	0.540409	1.12094	2.98918	17.2413	29.5866	3.62027	13.8389	2.73165	0.606111	2.40306	0.37666	2.21777	0.466732	1.24508	0.186653	1.21214	0.175588	1.51115	0.345729	0.367869	0.154	8.99431
USGS Portland-1	146.18	6.17978	3.27157	30.0354	0.252886	1.58663	0.0257565	1.19653	29.4091	0.369476	1.1208	0.070403	256.125	29.8954	5.46424	938.691	20.0696	49.9304	0.907847	49.2424	10.6287	16.4425	22.5796	6.55194	45.6211	10.4746	4.29585	0.304987	1.13434	3.66506	13.5328	23.0258	2.87288	10.8572	2.01982	0.471723	1.84534	0.277669	1.71458	0.363492	0.980478	0.150401	0.963033	0.151489	1.34703	0.370527	0.697502	0.166612	5.53845
USGS Portland-1	146.53	12.0536	6.38117	30.3071	0.90649	2.18072	0.0507436	1.73641	24.3927	0.759132	1.50259	0.113273	254.582	146.269	35.5978	670.34	120.33	63.4611	1.06423	244.998	27.3582	49.8683	158.185	12.3153	42.6666	13.518	5.91569	0.402458	0.916847	2.62392	6.18035	13.1212	1.81602	7.91031	2.04436	0.635986	2.17161	0.388567	2.42182	0.531296	1.45312	0.209878	1.32417	0.201465	1.76414	0.349603	1.82157	0.114421	3.65482
USGS Portland-1	146.94	2.00591	1.06193	10.758	0.115225	0.755101	0.122124	0.489671	43.9181	0.161652	0.234446	0.0497138	57.582	39.8717	6.15066	361.368	19.5464	14.2613	0.587359	33.7631	3.95558	12.0554	18.639	2.19704	8.13523	21.3791	0.0295483	0.14883	0.208282	0.456066	12.4224	16.1582	1.77557	6.88362	1.43174	0.387127	1.73012	0.310043	2.17914	0.542629	1.75319	0.275213	1.9272	0.327294	0.259403	0.0521416	-0.193414	0.00580819	0.957539
USGS Portland-1	147.22	24.5048	12.9729	55.881	0.244496	1.78397	0.00230996	3.26644	1.15709	1.01262	3.45682	0.0310139	291.921	2.93015	5.04519	735.981	70.6155	164.039	0.940444	13.3535	1.35845	13.3166	2.58472	27.9161	72.9072	9.56966	1.00281	1.49092	2.6795	4.4909	47.7183	97.4798	10.2082	33.3789	4.99907	0.736905	3.47671	0.473684	2.41093	0.439389	1.0984	0.146563	0.87594	0.116328	6.11923	3.39374	34.3202	0.157817	34.4006
USGS Portland-1	147.9	6.55264	3.46897	22.6647	0.249304	5.12542	0.0487764	1.08078	31.2922	0.361424	1.13276	0.116138	197.991	23.9944	5.1125	794.737	69.5439	64.2422	1.02109	57.573	8.86918	22.6666	20.6339	8.11254	45.7918	15.4487	1.52619	2.16183	1.3552	2.90495	23.3104	38.2047	4.70687	17.2167	3.29668	0.671118	2.86031	0.430604	2.53497	0.526233	1.43901	0.208347	1.37939	0.202979	2.01038	0.583703	0.176059	0.2226	13.2751
USGS Portland-1	149.45	17.297	9.15701	40.317	0.355718	3.51456	0.017442	1.96056	8.98075	0.518742	2.1604	0.094152	410.344	45.3888	7.34562	594.285	59.0661	134.117	1.63298	114.305	10.9408	40.6537	19.742	17.3765	69.4353	12.5483	10.5415	20.8328	1.46123	5.24596	25.0151	44.3867	4.72038	15.9449	2.80179	0.600366	2.52643	0.410368	2.1199	0.434558	1.22063	0.182654	1.17868	0.188193	4.49995	1.23613	0.690729	1.93789	6.97715
USGS Portland-1	150.83	12.0638	6.3866	34.5861	0.39322	2.41542	0.0164227	1.45572	14.9855	0.299244	1.86358	0.114905	378.344	54.163	7.35865	792.805	47.7522	83.1383	1.5951	194.883	6.76323	39.3464	19.8801	12.1332	81.7811	11.7482	9.57467	20.4981	0.750984	6.26621	20.7015	36.0005	4.11115	14.8416	2.56112	0.549469	2.22082	0.323056	1.87211	0.39745	1.14784	0.181667	1.14698	0.176612	2.52277	0.802064	0.935988	1.29285	2.37112
USGS Portland-1	155.45	10.5789	5.60047	42.0865	0.244764	2.15485	0.0151768	1.53708	13.52	0.364603	1.78514	0.100815	331.307	43.0809	6.52799	594.285	67.0471	98.5196	1.79679	94.2635	5.85986	30.595	17.0697	17.6387	70.1054	32.7735	14.1347	13.5214	2.34278	5.37438	34.2572	61.7779	7.26382	27.2909	6.20725	0.786292	6.00604	1.0332	6.1726	1.26266	3.41009	0.531179	3.59752	0.525974	2.76011	0.96268	0.797842	1.64659	8.41033
USGS Portland-1	158.57	9.13288	4.83495	33.5505	0.359823	2.81765	0.0207266	1.28907	17.5331	0.232882	1.67701	0.132053	351.517	67.553	7.65834	1233.72	102.237	79.9703	1.5992	135.526	7.91051	39.8853	21.6847	10.9167	83.2634	14.8777	9.11907	22.0316	0.841854	6.43438	21.8706	38.9456	4.6561	17.185	3.17582	0.738512	2.79077	0.397756	2.33938	0.504869	1.41046	0.222147	1.37465	0.221971	2.2079	0.621117	1.06012	1.15691	3.53285
USGS Portland-1	160.07	9.7289	5.15048	34.0533	0.369809	2.85797	0.0183481	1.26162	15.3838	0.228197	1.71729	0.111628	278.615	66.1391	8.32395	576.903	91.1016	79.1158	1.63298	178.788	8.69243	61.8686	25.8066	12.0283	85.5478	14.8575	10.0253	30.9199	0.781274	6.49146	23.1304	42.7494	4.9516	17.9856	3.27009	0.667881	2.92637	0.42104	2.45266	0.522446	1.42718	0.213261	1.45246	0.232587	2.19371	0.665845	0.986041	1.37054	3.16896
USGS Portland-1	163.03	11.7873	6.24021	42.5892	0.453912	3.99951	0.0229918	2.00565	10.3636	0.240131	2.03955	0.161653	304.841	66.0144	8.57695	450.139	74.4262	109.837	1.73946	130.503	8.37625	32.3812	18.963	13.6957	92.7665	17.5211	12.5267	11.1454	1.38707	7.62178	28.3512	52.663	5.75369	20.7977	3.88379	0.740589	3.46487	0.518053	2.98162	0.64549	1.74193	0.281387	1.7733	0.272156	3.39931	1.01859	1.3254	0.923864	4.44452
USGS Portland-1	169.19	11.644	6.16431	43.9666	0.453579	3.28398	0.0369227	2.13211	10.8746	0.204329	2.05863	0.146143	493.231	71.1084	8.53134	479.604	80.2447	110.566	1.68929	161.258	7.43976	37.9594	19.9886	13.5803	93.6498	16.6805	12.8245	14.2666	1.13327	7.46992	24.2189	46.3334	5.20585	18.962	3.69025	0.721893	3.32337	0.479248	2.80564	0.598616	1.64947	0.245843	1.66379	0.26154	3.30097	0.999276	1.38947	1.13194	3.02106
USGS Portland-1	170.71	13.1596	6.9667	47.6363	0.485423	3.10096	0.0338647	2.31836	7.98122	0.228755	2.37771	0.179457	588.99	82.1177	9.08294	358.882	92.4726	122.029	1.93091	120.046	7.14967	38.0592	25.4023	15.1429	105.894	18.0072	14.1347	3.55206	1.54479	8.42697	25.0655	49.4383	5.55125	20.6903	3.95599	0.796679	3.54054	0.548128	3.05141	0.644513	1.76258	0.278425	1.76754	0.268295	3.50994	1.09992	1.52661	0.731045	5.687
USGS Portland-1	172.26	12.9446	6.85285	50.6124	0.486754	3.37808	0.0395277	2.12917	7.26126	0.272476	2.40315	0.166677	686.433	69.3307	9.18609	309.067	93.0076	125.989	2.31791	116.561	8.14037	34.856	21.4579	14.9331	103.457	23.4053	14.6806	5.08887	1.29098	7.98768	28.0287	56.3868	6.28425	23.3755	4.56869	0.868349	4.25395	0.651932	3.81907	0.812477	2.23864	0.363334	2.34775	0.356118	3.69905	1.09077	1.85396	0.839246	3.38787
USGS Portland-1	173.76	12.0741	6.39202	44.8413	0.435716	3.42874	0.0706742	1.89096	10.0103	0.187711	1.88478	0.187212	459.788	57.5521	10.2383	377.43	73.501	118.486	2.13363	92.0491	10.6497	29.5672	19.1306	13.2238	86.4514	31.781	15.1472	7.2834	0.849166	7.3364	32.0198	64.4036	7.20146	27.0565	5.25661	1.00857	5.06465	0.763498	4.49064	0.993136	2.76879	0.431459	2.81846	0.463243	3.52129	1.044	1.73884	1.19436	2.98701
USGS Portland-1	175.29	15.6379	8.27872	53.5984	0.563645	3.73274	0.0342045	2.15172	4.09808	0.211133	2.56746	0.147563	588.629	86.1098	10.88	234.132	90.4885	155.272	2.26979	117.278	9.25051	36.9316	26.2602	18.163	116.555	23.2939	17.0927	5.10183	1.29203	9.57462	32.2818	62.1273	6.94146	25.3869	4.92168	0.97845	4.34436	0.670365	3.77861	0.806618	2.27995	0.347537	2.25649	0.355153	4.39404	1.31644	1.76186	1.08616	2.92766
USGS Portland-1	178.1	17.7885	9.41725	54.815	0.646972	3.88887	0.0245774	2.14976	1.33246	0.257419	2.81657	0.144942	670.313	82.939	12.6607	187.92	112.47	167.673	2.58922	136.859	9.05579	39.8154	31.3387	20.2709	123.154	25.9778	19.1275	6.73261	1.55524	9.85898	33.3502	65.8312	7.52767	27.906	5.10418	1.11764	4.61656	0.726633	4.32982	0.923802	2.53371	0.383081	2.5783	0.397617	4.77227	1.50552	1.87598	1.18743	6.79034
USGS Portland-1	178.33	17.5223	9.27629	56.7152	0.656181	3.95815	0.0294476	2.1527	1.59399	0.224405	2.82081	0.203159	605.832	88.0642	12.4979	202.865	107.9	180.803	2.50629	141.062	8.74161	41.8411	32.5319	20.0821	120.21	31.781	19.3558	6.89136	1.94065	9.05583	37.5731	76.0344	9.06083	34.2528	7.0546	1.40847	6.17506	0.965286	5.37056	1.15133	3.05796	0.439358	2.96639	0.469034	5.10416	1.49231	1.79189	1.18743	7.91315
USGS Portland-1	179.86	17.6452	9.34135	58.4646	0.658955	4.77087	0.0237846	2.03408	0.844717	0.249054	3.00208	0.220962	723.245	97.7221	12.7042	195.021	202.646	196.018	2.28924	129.58	11.252	47.08	34.6324	19.8514	122.24	32.0747	19.4352	5.68826	1.62522	9.00997	40.7479	83.5619	9.87251	37.8264	7.62418	1.51961	6.7342	1.01864	5.56374	1.11716	3.10321	0.45318	2.99521	0.460348	5.246	1.48112	1.62972	1.16246	9.41444
USGS Portland-1	180.04	19.0379	10.0787	57.2782	0.633546	4.08947	0.0181216	1.84979	0.499766	0.239462	2.93636	0.134128	475.306	79.3524	12.487	190.252	99.0937	183.513	2.50117	117.176	7.75092	33.2494	27.9662	22.3997	123.052	26.8893	22.7604	3.92465	2.26235	8.81224	39.8408	72.59	8.09085	28.7946	5.42407	1.06155	4.7502	0.737304	4.35208	0.942356	2.6242	0.39789	2.61577	0.402443	5.33772	1.69054	1.69779	1.18882	11.5686
USGS Portland-1	181.48	17.1843	9.09737	56.0818	0.654073	4.36968	0.0210663	1.89096	0.627826	0.224851	2.77099	0.159905	463.637	90.0498	12.5196	172.976	122.725	188.202	2.35784	135.936	9.31977	41.1326	26.7139	20.0402	120.413	28.0641	20.5569	6.11918	1.6388	9.06908	36.6761	72.6499	8.20598	30.1225	5.98663	1.1758	5.18847	0.804244	4.57964	0.968723	2.71076	0.403814	2.74641	0.425605	5.2895	1.62853	1.69279	1.10558	5.08765
USGS Portland-1	182.98	17.0409	9.02147	59.7314	0.651077	4.52064	0.0300139	2.06741	0.832692	0.244816	2.9353	0.176398	767.395	104.895	12.6607	186.966	111.801	184.346	2.37013	122.404	9.63394	42.829	23.5188	19.9982	128.738	28.4186	20.5271	1.92993	2.18402	9.03647	39.1454	76.224	8.61278	31.7629	5.99867	1.15711	5.33685	0.823646	4.61706	0.99216	2.73141	0.414675	2.72816	0.418849	5.11078	1.55432	1.67176	0.736594	10.1578
USGS Portland-1	184.53	17.2355	9.12448	55.4886	0.650078	4.81947	0.0440581	2.14976	2.69122	0.224851	2.73071	0.166241	488.299	76.9925	12.7693	224.593	80.3339	173.717	2.24215	112.255	10.1579	32.3014	21.7636	19.411	119.397	27.1526	19.8025	2.95915	1.65342	8.59412	37.17	75.2157	8.51971	32.3976	6.02374	1.21839	5.52847	0.801333	4.6737	0.954075	2.67633	0.399865	2.55333	0.401478	5.21763	1.56753	1.59669	0.817051	9.49811
USGS Portland-1	185.98	14.3066	7.57392	48.0787	0.531691	3.75755	0.0560636	1.88508	7.84595	0.197637	2.33531	0.17334	481.923	73.593	11.2926	358.564	232.519	135.576	2.03329	99.9531	7.99583	30.8645	21.0141	16.4852	104.676	24.2561	16.3284	1.63401	1.96154	7.92857	32.9672	64.4535	7.47394	28.0525	5.35187	1.04285	4.84748	0.734394	4.11844	0.847632	2.32618	0.378144	2.2392	0.37542	3.91559	1.28188	1.5166	0.768499	10.8486
USGS Portland-1	186.75	17.3891	9.20581	55.1267	0.629774	4.59302	0.0378288	2.25465	2.27036	0.204552	2.84096	0.15641	483.848	78.3856	10.425	205.09	96.7641	176.635	2.40289	98.2821	9.58074	37.6999	19.5152	18.7922	111.377	22.3014	21.212	2.3306	2.11195	7.64726	32.3423	64.5334	6.92994	24.7034	4.59276	0.889123	4.36303	0.647081	3.62083	0.758768	2.15602	0.319892	2.14987	0.332956	5.26775	1.67834	1.72983	1.20269	10.9751
USGS Portland-1	189.17	13.6717	7.23778	62.7979	0.584394	4.17632	0.0440581	2.54677	1.71724	0.187822	2.42117	0.216593	572.268	107.39	9.36091	146.796	53.9498	205.293	1.83877	97.5747	7.2099	39.3963	22.6609	15.9608	97.3861	25.2486	16.8941	5.01004	1.53644	7.79811	31.3042	57.0258	6.28809	22.9458	4.40123	0.905742	4.08985	0.63544	3.82817	0.855445	2.48552	0.376169	2.57062	0.42657	5.41431	1.2402	1.48256	1.04455	6.24353
USGS Portland-1	190.58	15.5867	8.25161	59.8621	0.60836	4.02743	0.0429255	2.2468	1.45421	0.216486	2.78583	0.199882	575.757	95.5389	10.2285	168.418	85.3499	210.711	2.36398	90.8702	7.46585	39.0371	27.3253	17.5234	106.706	25.9575	16.7651	3.36306	1.89574	8.17114	33.5013	62.6964	6.86278	25.0354	4.81939	0.922361	4.33748	0.693648	3.97988	0.8906	2.57011	0.4127	2.732	0.415954	5.45024	1.2341	1.49758	0.893346	9.87562
USGS Portland-1	192.07	15.3717	8.13776	62.9186	0.558319	4.15254	0.0241244	1.99193	0.644585	0.224405	2.96074	0.15925	353.322	76.7326	10.109	170.114	82.5186	205.814	2.48377	79.2346	7.51805	31.1039	25.1558	17.8484	117.976	27.3147	17.7577	4.27241	2.3292	9.22808	35.3457	67.4785	7.60058	27.8474	5.33282	0.981566	4.83864	0.744095	4.20542	0.958957	2.72846	0.419611	2.85976	0.432361	5.43228	1.39472	1.69779	1.06258	13.6897
USGS Portland-1	192.91	14.4807	7.66608	64.6781	0.574075	4.03156	0.0326188	1.889	0.810146	0.26545	2.92152	0.241606	299.668	91.6508	8.68553	161.529	71.5949	222.383	2.39879	78.722	7.1035	36.2131	25.3234	17.2926	114.321	37.8071	18.9786	5.23251	2.01481	8.59107	39.6896	76.6134	9.06275	35.61	7.34942	1.51961	6.9268	1.04872	6.15845	1.27047	3.44254	0.510445	3.40732	0.526939	5.96841	1.49231	1.95707	1.08062	12.668
USGS Portland-1	194.01	19.4271	10.2847	58.2032	0.506282	4.13496	0.0377155	2.23896	0.7628	0.23277	3.22788	0.148874	474.705	58.5189	10.4858	207.846	81.8498	184.659	2.42439	75.4825	7.05131	28.8886	20.8761	20.2604	114.727	33.0875	19.8918	7.11384	2.77311	8.49832	33.6727	67.6183	7.84044	29.937	5.97761	0.973257	5.55795	0.874094	5.37157	1.14645	3.24386	0.504521	3.38234	0.527905	6.11403	2.30047	1.32139	1.08062	13.3491
USGS Portland-1	195.2	15.7915	8.36004	64.4669	0.658178	4.49376	0.0280885	1.83999	0.619409	0.208902	2.9671	0.191581	712.779	108.43	10.9886	164.92	83.2766	216.339	2.32303	92.4489	9.01162	40.9131	23.0652	17.8275	117.367	28.9452	17.3408	10.9294	1.49152	9.74381	35.8396	64.2139	7.29549	26.6367	4.88658	1.00338	4.52517	0.714991	4.21655	0.944309	2.70682	0.413688	2.7906	0.43043	5.43889	1.33982	1.78589	1.10281	9.4913
USGS Portland-1	196.49	14.2861	7.56307	66.3671	0.605808	4.78948	0.0369227	1.68412	0.862002	0.202656	2.66287	0.234288	593.321	123.504	9.93097	154.215	122.056	251.561	1.83877	78.5375	10.4389	45.2539	21.5663	14.8492	97.5079	34.1104	15.3159	8.73813	1.48943	7.43832	38.6918	77.3721	9.30069	36.1177	7.11176	1.47183	6.62217	0.977898	5.63049	1.12106	3.02255	0.446269	2.88954	0.465174	6.44119	1.21275	1.60269	1.07645	8.35001
USGS Portland-1	198.27	15.6584	8.28956	63.1297	0.591495	4.73468	0.0345443	1.76549	0.712824	0.182134	2.86428	0.162964	624.358	96.7241	10.4033	147.538	76.9899	199.978	2.04967	82.1256	8.88314	34.8859	19.5349	17.5338	109.955	27.8616	16.1199	9.03297	1.20533	8.8948	37.8352	69.3953	7.83468	28.2868	5.13326	1.08959	4.76789	0.726633	4.33994	0.94138	2.67141	0.4127	2.73872	0.460348	5.44835	1.28798	1.64073	1.07645	6.21435
USGS Portland-1	201.27	16.4982	8.73413	64.2256	0.638317	3.91989	0.0236713	1.75078	0.56823	0.159716	3.03177	0.160124	653.11	114.667	11.9007	142.556	98.2689	230.511	2.49298	79.3474	8.35316	33.2693	22.513	18.7084	117.671	35.1131	16.4772	1.95693	1.855	9.18731	37.8352	71.1424	8.61949	32.7588	6.7648	1.36069	6.00801	0.933272	5.40394	1.17672	3.06977	0.458117	3.01346	0.460348	6.01285	1.32356	1.66276	0.77821	8.49109
USGS Portland-1	204.39	13.3747	7.08056	69.9464	0.518154	4.5496	0.0201603	1.61942	0.475867	0.165293	2.61834	0.144614	738.403	80.5999	8.33589	136.091	116.482	237.285	2.21758	66.0101	15.0963	40.2645	17.3753	15.5414	96.4926	32.3583	14.9089	2.50124	1.84665	7.17944	39.8005	76.7532	9.27574	35.815	7.1619	1.369	6.43154	0.940063	5.11063	1.04489	2.88485	0.424548	2.84055	0.4285	5.64786	1.01961	1.64173	0.582617	11.4421
USGS Portland-1	204.93	19.1096	10.1166	61.692	0.685916	4.28903	0.0146105	1.93703	0.40357	0.16005	3.15367	0.104856	598.734	82.6895	12.9105	159.939	119.492	215.297	3.50246	96.9186	12.336	39.3963	26.4969	21.4034	138.282	33.3508	18.7999	3.16111	2.16626	12.8728	44.4568	81.8647	9.33235	34.1161	6.10396	1.1301	5.61101	0.843049	5.06815	1.10837	3.25173	0.476876	3.13738	0.485441	6.02231	1.53399	2.28441	0.8767	14.1275
USGS Portland-1	205.16	13.4668	7.12935	64.8691	0.570857	3.48044	0.0152901	1.39592	0.440545	0.105288	2.11588	0.126483	413.713	95.4454	8.62364	112.349	71.8179	387.763	2.48991	70.1517	17.4752	42.1006	22.6116	16.0028	102.036	32.9052	19.336	2.19884	2.22266	9.38097	51.2498	95.3724	10.6305	38.9005	7.10574	1.21735	6.23599	0.891556	4.99937	1.12204	3.22025	0.504521	3.27763	0.525009	9.52185	1.4303	1.90101	0.744917	17.8345
USGS Portland-1	207.31	20.7174	10.9678	59.4901	1.06438	3.03375	0.0104199	1.45768	0.325637	0.134509	2.51658	0.0539572	554.825	67.5946	14.5392	156.229	112.358	256.251	5.1938	87.2206	24.7523	26.7731	21.5861	25.7345	120.007	57.3132	34.5923	2.71075	3.42695	14.2488	77.8473	155.044	16.8379	61.9147	11.4819	2.0857	10.1313	1.57744	9.20581	1.98432	5.47758	0.824413	5.57543	0.850245	7.00475	2.26591	3.95818	0.692204	33.5771
USGS Portland-1	208.97	16.4982	8.73413	47.757	0.551995	2.78353	0.00679559	0.697372	0.169019	0.0863269	1.18515	0.0363719	280.781	39.1824	8.60192	77.3514	71.7398	311.482	5.46921	47.8647	13.6911	15.8863	8.79319	24.8431	61.577	53.4241	28.3488	3.13843	1.73698	6.26213	82.1811	164.129	17.9605	65.0587	11.9031	1.93405	10.8486	1.592	8.99645	1.84077	5.20218	0.763199	4.98273	0.780758	10.5431	2.06971	2.90507	0.321826	8.95422
USGS Portland-1	209.59	16.0271	8.48474	53.0354	0.675598	2.19621	0.00407736	0.429755	0.174956	0.0736121	0.699744	0.037355	467.006	50.8779	9.01128	70.8543	65.6983	412.148	5.37092	41.7958	11.5631	17.8521	11.0346	23.8678	34.1745	57.7689	30.2943	3.71946	2.07852	3.99333	76.8495	150.551	16.3774	59.7568	10.9605	1.88939	10.318	1.55901	9.05309	1.95991	5.39299	0.808616	5.48898	0.835768	12.264	2.24151	3.2194	0.307955	8.47747
USGS Portland-1	211.53	12.7705	6.76068	71.0423	0.765803	0.877762	0.00317128	0.257422	0.128812	0.0559898	0.598615	0.0399764	220.27	109.989	9.41195	68.5755	72.6427	561.897	2.28413	56.7529	15.538	39.0171	12.928	14.4822	31.5246	56.0371	21.2914	3.35118	2.24146	4.89025	76.9402	155.942	17.6631	65.1954	12.6752	2.25501	11.1827	1.74819	9.64476	1.99799	5.46873	0.837248	5.22961	0.80006	15.2993	1.60616	2.02614	0.406445	19.6539
USGS Portland-1	211.61	19.212	10.1708	48.8629	1.09378	1.26768	0.00543647	0.563073	0.175106	0.0936881	1.41094	0.0668457	1021.95	115.811	15.7988	98.6448	74.5934	765.522	5.50811	109.897	17.4752	40.0749	22.6313	27.664	85.3245	73.3151	33.0835	4.24541	3.57527	12.8423	123.564	261.668	28.8116	100.181	18.2106	3.05792	15.7619	2.31281	12.946	2.68449	7.5077	1.1522	7.86939	1.18706	24.1308	2.50886	3.08526	0.883636	19.0507
ODP Site 1260	424.53	7.31325	3.87163	40.7571	0.293424	2.18851	0.00942945	1.32251	10.6177	2.03771	1.54412	0.618355	1174.78	317.455	6.83694	783.935	1289.82	75.7588	1.49677	1657.93	7.22506	177.378	142.58	11.6375	51.1095	15.6695	6.28152	69.5887	0.110146	2.99315	10.8613	14.6523	2.14971	8.18843	1.84196	0.47437	1.21317	0.222142	1.69139	0.337556	0.994939	0.182864	1.01552	0.172628	1.78821	0.444565	2.66153	0.0126778	0.354384
ODP Site 1260	425.17	6.77616	3.5873	47.6229	0.271092	1.8777	0.00838378	1.20057	7.98608	1.84573	1.4468	2.05404	1148.7	298.401	7.57102	747.316	700.053	76.0289	1.40589	1183.94	6.57939	133.991	110.028	9.89052	48.9096	26.1517	6.22508	53.4428	0.194201	2.86923	18.559	24.8522	3.67196	14.0668	2.86301	0.699389	2.37768	0.394418	2.69762	0.570445	1.64503	0.274676	1.60875	0.279615	1.82543	0.445145	2.05705	0.0376265	0.995443
ODP Site 1260	425.48	0.556767	0.294752	1.80841	0.0245697	0.331914	0.00483565	0.599262	45.3827	0.147315	0.0652619	0.0509395	881.701	12.2962	1.03508	370.533	28.0459	8.42158	0.359749	126.567	1.65353	20.7894	38.6458	0.828963	2.89773	2.25517	0.999491	9.1046	0.653555	0.31386	2.18876	3.65361	0.453816	1.84019	0.445921	0.13491	0.344612	0.0634358	0.592623	0.0654232	0.200276	0.0665714	0.241209	0.0470869	0.37572	0.0570363	<LOD	0.143875	2.4723
ODP Site 1260	426.33	3.7996	2.01151	19.5256	0.162129	1.33579	0.00601762	0.735642	32.2467	1.34256	0.767374	0.231246	506.804	126.296	4.20326	889.859	1211.3	42.7523	0.781853	1863.24	4.54462	144.071	99.9372	6.41151	28.0683	10.0112	3.7765	101.416	0.199171	1.55595	9.20402	15.0543	2.1126	7.88681	1.71464	0.405952	1.08095	0.201637	1.46902	0.254941	0.750624	0.14098	0.700968	0.116121	1.06768	0.23294	2.40912	0.0761403	3.12179
ODP Site 1260	426.87	4.20416	2.22568	22.2819	0.18682	1.47898	0.00584073	0.802803	27.3654	1.40058	0.856016	1.96527	622.396	137.749	5.328	961.667	992.448	59.9533	1.03298	1798.27	5.03325	141.593	126.307	7.43601	31.6046	22.9471	4.46166	102.433	0.172154	1.75144	16.9193	23.8577	3.1223	11.7464	2.33792	0.575096	1.86862	0.327967	2.39813	0.523568	1.57543	0.273888	1.64261	0.260765	1.29524	0.301963	2.18381	0.0481004	1.29227
ODP Site 1260	427.835	4.19436	2.2205	23.238	0.178404	1.5305	0.00581664	0.770246	27.2791	1.30914	0.837787	0.372539	533.925	135.694	5.13186	888.559	1438.73	52.515	0.827248	1910.36	5.08707	229.522	108.961	7.4463	31.9569	16.8327	4.70206	88.6995	0.222531	1.87598	14.4994	23.9405	3.02648	11.7725	2.41488	0.558449	1.77702	0.306956	2.10901	0.426405	1.23145	0.218615	1.22966	0.193524	1.28662	0.302163	1.35238	0.283422	2.50507
ODP Site 1260	422.02	3.62193	1.91745	15.4455	0.153701	1.3225	0.00470824	0.841482	25.5988	1.03816	0.691272	1.03225	433.921	139.182	4.18915	831.091	1091.09	30.7276	0.903661	1706.32	4.64846	115.974	61.6275	6.24939	26.8529	13.3625	3.21044	62.7086	0.512162	1.50296	10.4782	15.9786	2.00366	7.77631	1.5462	0.362319	1.5074	0.236264	1.68284	0.339214	1.01834	0.186974	1.06501	0.185772	0.932693	0.192494	0.348315	0.230366	3.98504
ODP Site 1260	423.07	1.00993	0.534659	3.92059	0.0500689	0.540431	0.00318605	0.461299	40.4675	0.409494	0.200656	0.164104	126.648	32.5288	1.66499	693.491	88.4664	13.9704	0.387935	526.051	2.66962	87.3197	41.4949	1.46743	7.85607	6.98741	1.34115	56.4923	0.0857357	0.534976	5.4444	8.40291	1.09831	4.38109	0.95211	0.197585	0.835842	0.138077	1.05388	0.182891	0.543326	0.114118	0.543496	0.0967555	0.516949	0.082884	0.277164	0.255888	0.726145
ODP Site 1260	428.47	4.58879	2.4293	14.9925	0.21485	2.04071	0.00648477	0.809838	30.6373	1.00021	0.944801	1.24125	275.228	138.95	5.79506	875.804	1430.82	54.9	0.936574	2178.21	7.36304	385.872	95.9088	6.35589	35.688	25.7548	4.54533	381.355	0.0958555	2.02703	18.4143	30.369	4.07346	16.4143	3.32348	0.783905	2.8654	0.473915	3.11717	0.664203	1.88079	0.308008	1.7465	0.270067	1.3715	0.29641	1.83966	0.46774	1.30548
ODP Site 1260	431.115	3.64494	1.92963	12.8064	0.196113	2.07571	0.00774387	0.877614	30.2239	0.838746	0.761659	0.904753	293.977	111.159	5.64085	767.516	683.949	36.0795	0.783304	1804.04	6.7104	329.221	64.8801	6.05333	28.8849	28.5776	3.24792	157.208	0.689551	1.51814	19.6696	29.368	4.0031	15.8633	3.23445	0.743185	3.00788	0.478496	3.09779	0.694375	2.0284	0.301974	1.80764	0.299546	1.03998	0.161546	0.721151	0.174625	0.722488
ODP Site 1260	432.75	0.56284	0.297967	1.83195	0.0243317	0.25892	0.00413147	0.491691	45.1658	0.143947	0.099619	0.105337	94.3056	15.6369	1.05574	795.858	111.832	5.59133	0.33031	211.583	1.66093	48.2243	23.0826	0.858772	3.83411	2.44677	0.85331	26.0197	0.0685131	0.350752	2.30822	4.26894	0.526168	2.07009	0.50687	0.0893633	0.351679	0.0615991	0.595298	0.0680069	0.21016	0.0650612	0.229094	0.0425171	0.309278	0.0543554	11.1891	0.203535	1.18572
ODP Site 1260	435.99	3.20763	1.69812	11.5959	0.163702	1.61456	0.00594208	0.747825	28.6209	0.76101	0.638815	0.777429	137.543	170.991	4.52645	751.309	1244.87	29.3565	0.830533	2469.95	5.84363	538.424	84.9796	5.26792	27.212	24.9357	3.12738	270.968	0.0985582	1.40275	17.6308	24.2832	3.43252	13.2858	2.71738	0.617638	2.75466	0.413088	2.83112	0.611095	1.79053	0.27627	1.56954	0.258528	0.879241	0.164724	0.213821	0.215562	0.103384
ODP Site 1260	437.56	2.71904	1.43946	11.0042	0.138616	1.43211	0.00514967	0.598423	27.9765	0.80245	0.496775	0.672024	137.759	111.104	3.37283	767.787	638.615	34.3779	0.834916	1737.9	5.65568	434.516	64.2621	4.30569	22.0268	18.1446	2.8114	248.491	0.0872851	1.15515	12.6959	18.8259	2.53637	10.3003	2.09922	0.478238	2.09637	0.330892	2.1711	0.455464	1.27357	0.211726	1.16839	0.197824	1.06159	0.150961	0.745209	0.102628	0.0579728
ODP Site 1260	439.29	3.06078	1.62038	11.3639	0.143628	1.29185	0.00464831	0.559053	28.8854	0.796188	0.541612	0.332651	157.238	142.07	3.654	762.44	1149.7	26.9762	0.738483	2109.46	5.45477	453.061	48.4993	5.08321	26.3317	17.4058	3.06578	238.739	0.133408	1.45703	14.2681	21.1586	2.99882	11.7543	2.44473	0.54913	2.3181	0.353791	2.34332	0.47972	1.29451	0.20664	1.12991	0.175723	0.897504	0.163171	0.563596	0.818766	1.47736
ODP Site 1260	441.97	3.7652	1.9933	13.7509	0.190831	1.9306	0.007848	0.74887	33.6077	0.938279	0.742678	0.726082	239.301	146.52	5.4933	855.871	1073.4	62.8042	0.803201	2584.1	6.42966	609.256	71.2312	5.74009	31.689	23.7647	4.11328	310.755	0.239058	1.69204	16.5584	24.4871	3.32495	13.0359	2.77465	0.62763	2.14902	0.375314	2.54659	0.536491	1.52594	0.259289	1.53427	0.250296	1.49341	0.262042	2.34758	0.673734	2.10075
ODP Site 1260	445.19	0.979078	0.518324	3.62809	0.0462213	0.425347	0.00323199	0.462974	41.5587	0.384493	0.174674	0.138783	73.3007	47.4104	1.67633	780.882	370.685	12.3641	0.384274	735.686	2.15519	153.269	30.999	1.57452	7.89808	5.37881	1.29998	80.8667	0.190166	0.554749	4.5956	6.80436	0.914627	3.57885	0.809131	0.164535	0.663424	0.112886	0.926162	0.138569	0.413803	0.0955094	0.433999	0.0756706	0.469619	0.0882703	0.87394	0.354139	3.13912
ODP Site 1260	446.53	1.97289	1.04445	6.8635	0.0930068	0.832875	0.0043517	0.508457	36.3418	0.787846	0.329604	0.375964	192.457	97.1409	2.52418	865.961	619.507	17.4914	0.546163	1445.12	3.33166	306.213	72.7959	3.0663	15.0834	11.3783	2.05735	156.275	0.959252	0.914648	8.81548	12.7805	1.77183	7.36703	1.53644	0.352362	1.42513	0.220408	1.54483	0.296183	0.808519	0.144253	0.758896	0.125641	0.633334	0.126194	0.0960494	0.214029	3.57427
ODP Site 1260	449.38	2.41087	1.27631	8.5172	0.12155	1.35546	0.0063778	0.601744	41.3781	0.90249	0.457734	3.66582	427.957	137.294	6.51385	1261.33	1539.77	58.3498	0.845981	1958.65	4.70315	565.19	71.5497	5.37054	19.7919	60.2894	2.64039	204.119	0.0744087	1.15235	32.0672	37.0478	5.54218	22.9156	4.53211	1.11617	4.83919	0.773447	5.2717	1.2648	3.64638	0.567749	3.49957	0.571789	1.13561	0.15682	1.88853	0.00735347	1.23625
ODP Site 1260	450.82	5.3851	2.85087	22.9041	0.20704	3.21854	0.0135274	0.719658	20.1381	1.61689	1.06519	0.164989	1232.15	71.4313	7.07452	999.107	70.2116	47.9998	0.902545	231.963	13.5107	117.836	66.7874	8.81397	30.6822	17.8149	4.40646	25.6507	0.0102996	1.92646	17.8	31.1647	4.98701	20.7729	4.57058	1.2223	3.63628	0.582451	3.2838	0.580376	1.36177	0.20673	1.00659	0.151742	1.24388	0.30404	1.97697	0.115703	0.394313
ODP Site 1260	451.97	6.06161	3.20901	27.2276	0.240314	2.22503	0.0099628	1.22429	26.0389	1.55732	1.31193	10.6007	1423.28	282.682	11.8293	1193.07	591.967	79.5411	1.91039	911.991	6.23815	112.462	109.961	9.71691	43.9356	109.889	5.06303	50.4217	0.0944591	2.64656	65.5654	70.1985	11.4208	47.2446	8.84756	2.2378	9.53859	1.44839	9.10605	2.19707	5.94047	0.875214	5.35156	0.84615	1.68047	0.365804	1.53761	0.042503	0.86208
ODP Site 1260	453.33	0.301238	0.159476	1.27822	0.0139215	0.115637	0.00246028	0.379237	46.6361	0.39975	0.0623191	10.6632	267.736	11.7606	11.1319	1123.29	123.67	34.6252	1.86098	135.934	1.8946	26.655	8.11263	1.85946	1.61704	252.345	0.585124	5.62462	0.149177	0.24487	147.971	102.975	16.9919	69.8591	12.5476	3.5251	16.1818	2.32789	15.4413	4.14866	12.0772	1.65264	10.3888	1.69971	0.458261	0.0554473	0.499326	0.0869083	0.769238
ODP Site 1260	456.38	2.82612	1.49615	11.9041	0.111486	1.90235	0.00722506	0.514669	33.6953	1.11639	0.623653	0.595382	628.996	59.0788	4.3293	962.864	97.7127	38.0128	0.704776	504.115	9.18554	259.437	82.8819	4.06149	21.16	25.7433	4.05704	83.8923	0.0938518	1.30122	19.1009	20.1055	3.22104	12.427	2.5173	0.594217	2.05897	0.344886	2.44612	0.520768	1.49254	0.251745	1.46642	0.23528	0.922708	0.289517	0.8498	0.0857673	1.11343
ODP Site 1260	459.28	2.88999	1.52996	14.4304	0.1225	1.05669	0.00518829	0.616308	34.8853	1.2802	0.604368	2.01781	824.961	115.625	4.49511	1062.42	1287.54	41.8649	0.869672	1683.66	3.57973	128.203	99.7728	5.12509	22.3741	22.2751	3.03857	71.1735	0.106376	1.27876	14.2101	18.0656	2.43586	9.4157	1.89059	0.472503	1.40779	0.260809	2.02783	0.449529	1.42434	0.250751	1.56113	0.253451	0.966435	0.170101	1.16982	0.00330689	0.741848
ODP Site 1260	462.7	2.95407	1.56388	12.2461	0.12307	1.69037	0.00657049	0.517702	34.5084	1.04798	0.648517	0.321677	727.399	62.2668	4.12426	986.224	170.16	36.063	0.682196	515.043	7.65455	166.411	90.9575	4.46847	22.6034	13.6326	3.90351	47.1728	0.0119342	1.40895	11.5632	12.8545	1.95912	7.7561	1.59194	0.409127	1.06061	0.200157	1.51445	0.294344	0.852783	0.166211	0.90615	0.151177	0.950953	0.249592	0.730778	0.0418427	0.625605
ODP Site 1260	466.5	1.84174	0.975017	8.18221	0.0776701	0.637247	0.0043688	0.539716	39.0954	0.66801	0.383704	0.0818498	296.238	60.9382	2.37445	818.198	629.236	13.5429	0.577708	789.124	2.78831	71.4755	38.258	2.94818	13.9411	3.8526	1.77112	36.7843	0.754134	0.875077	3.95892	6.30853	0.779627	3.04785	0.656455	0.15257	0.496596	0.0885093	0.774147	0.102781	0.321382	0.0828621	0.381865	0.0655907	0.527931	0.12125	0.586007	0.421014	3.64932
ODP Site 1261	622.57	7.42419	3.93037	37.9753	0.299645	2.20867	0.00742233	1.13853	5.48074	2.04774	1.48446	0.389884	1943.69	278.308	6.25219	793.931	640.935	46.4002	1.40954	1162.3	5.7652	67.1416	35.5695	10.8857	56.2088	18.1294	5.38215	34.2013	0.122024	3.37577	14.5419	20.1965	2.80355	10.7283	2.14136	0.604515	2.07093	0.313221	2.10344	0.445055	1.2857	0.219226	1.24524	0.212989	1.41593	0.442567	0.400581	0.149548	0.676658
ODP Site 1261	627.12	0.465309	0.246335	2.00701	0.0166404	0.19066	0.0159249	0.547744	45.3594	0.280283	0.0816704	0.0316861	314.804	7.18096	0.797034	649.278	6.66922	4.37351	0.340432	41.8705	1.88316	11.9774	5.02021	0.676982	2.64248	1.72358	0.744606	9.72432	0.0303106	0.306683	1.82189	2.86634	0.348666	1.43301	0.363446	0.0872008	0.241131	0.0466145	0.514584	0.0413318	0.130434	0.0583819	0.165578	0.034099	0.256942	0.0446555	0.233976	0.225653	0.767942
ODP Site 1261	627.535	1.02238	0.54125	10.7939	0.040004	0.506594	0.00518707	0.406891	38.2278	0.516823	0.204991	0.040632	304.404	25.5697	1.77069	642.102	43.8447	7.25477	0.442234	352.282	2.78986	59.6843	7.68958	1.47428	7.06301	3.72213	1.22493	28.0535	0.0968796	0.571462	3.53968	5.31263	0.673829	2.71743	0.616547	0.132745	0.450871	0.0781171	0.706003	0.0921053	0.282394	0.0807579	0.375407	0.0697609	0.362421	0.118749	0.239997	0.506142	1.18515
ODP Site 1261	630.165	4.57372	2.42133	23.5505	0.177942	1.77571	0.00488417	0.603097	12.6624	1.53096	0.966767	0.324459	1350.97	91.4107	4.30795	740.448	715.132	26.7203	1.01123	1130.05	5.7587	138.305	38.3982	9.66825	32.1789	20.689	3.52406	49.8087	0.129048	2.03772	15.7119	18.5668	2.76739	10.906	2.08117	0.61227	2.16753	0.325974	2.21979	0.476152	1.335	0.214583	1.16631	0.19304	0.925913	0.244093	0.588346	0.286408	0.286185
ODP Site 1261	633.66	1.74396	0.923251	9.11712	0.0793185	0.992426	0.0114444	0.464643	36.3961	0.66081	0.337953	0.058737	434.144	23.0312	5.61165	579.74	88.748	15.1476	0.523302	65.2615	5.03436	24.4583	79.2467	2.88282	11.3634	8.32109	1.70849	4.39682	0.223779	0.901228	7.01999	9.36348	1.22023	4.64949	0.997085	0.273226	0.858559	0.173563	1.2368	0.245545	0.724524	0.173082	0.930912	0.182712	0.57847	0.103509	<LOD	0.410624	15.6964
ODP Site 1261	636.44	1.59395	0.843836	10.7266	0.0651296	1.03213	0.00643923	0.370619	33.8953	0.737119	0.30376	0.276152	416.071	23.785	2.76495	782.636	101.619	13.1495	0.59101	231.565	5.35527	125.938	19.6445	3.0143	11.4705	18.2349	1.93411	47.5784	0.0335495	0.803584	13.848	17.3275	2.47143	9.79958	1.93706	0.477548	1.92329	0.298388	2.048	0.435152	1.26414	0.213286	1.18078	0.201913	0.469809	0.113284	0.479139	0.837213	0.839122
ODP Site 1261	637.57	1.73013	0.91593	10.0255	0.0801183	0.684635	0.00741932	0.516083	35.5616	0.63926	0.336187	2.22676	329.315	54.7808	2.5377	750.68	256.862	17.0133	0.65155	610.815	2.91738	43.2144	30.6619	3.04728	14.5441	11.5905	1.83573	19.3311	0.205717	0.929423	9.47517	14.425	1.78572	6.92176	1.30756	0.322363	1.24863	0.204001	1.44404	0.29121	0.883727	0.159768	0.835398	0.138233	0.577963	0.127371	0.236924	0.142972	3.37947
ODP Site 1261	647.995	2.6841	1.42096	10.9936	0.118261	1.04213	0.0102753	0.701355	35.575	0.845985	0.52606	0.0921924	286.699	73.5354	3.36652	648.87	806.974	19.9162	0.640244	1135.91	3.55556	87.4555	25.4287	4.58256	20.8956	4.32851	2.68081	66.2154	0.110691	1.30104	4.54999	7.78291	0.961781	3.71604	0.834678	0.174649	0.620802	0.107487	0.855548	0.128859	0.377658	0.0957336	0.474988	0.0831064	0.724928	0.168992	0.780851	0.35896	1.85835
[truncated: 81 more columns]
